# Supplementary material for: A Novel Goodness-of-Fit Test for Cauchy Distribution
Source: Hindawi journal article supplement (doi:10.1155/2023/9200213), 2023-03-14
Supplement: f1 [file 9200213.f1.pdf]

**Table 1.** The empirical power of tests for different alternatives (1/10)

| Distributions<br>( $R(\theta, P_5)$ ) | Statistics      | $n=10$  | $n=15$  | $n=20$  | $n=25$  | $n=30$  | $n=40$  | $n=50$  | $n=70$  | $n=100$ | $n=150$ |
|---------------------------------------|-----------------|---------|---------|---------|---------|---------|---------|---------|---------|---------|---------|
| Pareto(0.5,1)<br>(0.00700)            | $KS$            | 0.70604 | 0.90150 | 0.98257 | 0.99427 | 0.99958 | 1.00000 | 1.00000 | 1.00000 | 1.00000 | 1.00000 |
|                                       | $A^2$           | 0.71638 | 0.89196 | 0.97545 | 0.99291 | 0.99917 | 0.99999 | 1.00000 | 1.00000 | 1.00000 | 1.00000 |
|                                       | $W^2$           | 0.64621 | 0.82308 | 0.94650 | 0.97725 | 0.99598 | 0.99993 | 0.99999 | 1.00000 | 1.00000 | 1.00000 |
|                                       | $D_1$           | 0.58132 | 0.68517 | 0.71168 | 0.56598 | 0.47553 | 0.22653 | 0.12556 | 0.07061 | 0.06065 | 0.04339 |
|                                       | $D_2$           | 0.04385 | 0.02554 | 0.01529 | 0.01020 | 0.00619 | 0.00263 | 0.00120 | 0.00031 | 0.00003 | 0.00000 |
|                                       | $D_3$           | 0.04622 | 0.02487 | 0.01539 | 0.01081 | 0.00743 | 0.00429 | 0.00238 | 0.00083 | 0.00033 | 0.00004 |
|                                       | $D_4$           | 0.02665 | 0.01253 | 0.00661 | 0.00471 | 0.00265 | 0.00136 | 0.00064 | 0.00020 | 0.00003 | 0.00002 |
|                                       | $D_5$           | 0.52473 | 0.82901 | 0.63791 | 0.35862 | 0.16606 | 0.08811 | 0.05628 | 0.04195 | 0.04211 | 0.03650 |
|                                       | $D_6$           | 0.08178 | 0.07208 | 0.04173 | 0.04375 | 0.03099 | 0.02515 | 0.02172 | 0.01803 | 0.01531 | 0.01277 |
|                                       | $D_7$           | 0.07507 | 0.07158 | 0.06708 | 0.05466 | 0.05122 | 0.03882 | 0.02860 | 0.01533 | 0.00630 | 0.00140 |
|                                       | $D_{n,\lambda}$ | 0.03971 | 0.19577 | 0.38354 | 0.49326 | 0.73261 | 0.93820 | 0.98915 | 1.00000 | 1.00000 | 1.00000 |
|                                       | $Z_A$           | 0.78010 | 0.96005 | 0.99743 | 0.99976 | 0.99999 | 1.00000 | 1.00000 | 1.00000 | 1.00000 | 1.00000 |
|                                       | $Z_C$           | 0.68486 | 0.89720 | 0.97959 | 0.99582 | 0.99973 | 1.00000 | 1.00000 | 1.00000 | 1.00000 | 1.00000 |
|                                       | $Z_K$           | 0.72020 | 0.93656 | 0.99387 | 0.99906 | 1.00000 | 1.00000 | 1.00000 | 1.00000 | 1.00000 | 1.00000 |
|                                       | $M_{A^2}$       | 0.18891 | 0.49086 | 0.80759 | 0.96133 | 0.99565 | 0.99999 | 1.00000 | 1.00000 | 1.00000 | 1.00000 |
|                                       | $AP_{P_1}$      | 0.21258 | 0.25341 | 0.26450 | 0.24892 | 0.25517 | 0.29036 | 0.31379 | 0.35256 | 0.41050 | 0.49892 |
|                                       | $AP_{P_2}$      | 0.20597 | 0.24097 | 0.30864 | 0.33085 | 0.40603 | 0.45648 | 0.52502 | 0.63300 | 0.76333 | 0.88203 |
|                                       | $AP_{P_3}$      | 0.05835 | 0.03985 | 0.22390 | 0.27479 | 0.32423 | 0.45000 | 0.56696 | 0.68379 | 0.81679 | 0.93473 |
|                                       | $AP_{P_4}$      | 0.05823 | 0.04137 | 0.02898 | 0.02511 | 0.02125 | 0.29674 | 0.38875 | 0.60253 | 0.77200 | 0.91370 |
|                                       | $AP_{P_5}$      | 0.05843 | 0.04145 | 0.02920 | 0.02515 | 0.02151 | 0.01115 | 0.35077 | 0.54631 | 0.71951 | 0.89923 |
| $AP_{P_6}$                            | 0.05886         | 0.04178 | 0.02980 | 0.02578 | 0.03274 | 0.01207 | 0.01963 | 0.01823 | 0.50292 | 0.73774 |         |
| Weibull(0.2,1)<br>(0.01752)           | $KS$            | 0.94682 | 0.99540 | 0.99994 | 1.00000 | 1.00000 | 1.00000 | 1.00000 | 1.00000 | 1.00000 | 1.00000 |
|                                       | $A^2$           | 0.95057 | 0.99489 | 0.99991 | 1.00000 | 1.00000 | 1.00000 | 1.00000 | 1.00000 | 1.00000 | 1.00000 |
|                                       | $W^2$           | 0.92369 | 0.98645 | 0.99945 | 0.99995 | 1.00000 | 1.00000 | 1.00000 | 1.00000 | 1.00000 | 1.00000 |
|                                       | $D_1$           | 0.94941 | 0.98496 | 0.99374 | 0.97552 | 0.95287 | 0.67093 | 0.39758 | 0.21659 | 0.23456 | 0.22928 |
|                                       | $D_2$           | 0.02108 | 0.00901 | 0.00457 | 0.00213 | 0.00123 | 0.00026 | 0.00007 | 0.00000 | 0.00000 | 0.00000 |
|                                       | $D_3$           | 0.02416 | 0.00964 | 0.00532 | 0.00292 | 0.00185 | 0.00067 | 0.00046 | 0.00008 | 0.00004 | 0.00000 |
|                                       | $D_4$           | 0.01011 | 0.00365 | 0.00139 | 0.00073 | 0.00038 | 0.00016 | 0.00004 | 0.00000 | 0.00000 | 0.00000 |
|                                       | $D_5$           | 0.92489 | 0.99862 | 0.98568 | 0.83430 | 0.41946 | 0.18419 | 0.09811 | 0.06945 | 0.09427 | 0.12495 |
|                                       | $D_6$           | 0.09571 | 0.10214 | 0.04403 | 0.04985 | 0.03039 | 0.02389 | 0.02157 | 0.02062 | 0.02610 | 0.03479 |
|                                       | $D_7$           | 0.04354 | 0.03047 | 0.02499 | 0.01763 | 0.01668 | 0.01067 | 0.00729 | 0.00345 | 0.00116 | 0.00028 |
|                                       | $D_{n,\lambda}$ | 0.08112 | 0.44635 | 0.84189 | 0.92674 | 0.98856 | 0.99947 | 0.99999 | 1.00000 | 1.00000 | 1.00000 |
|                                       | $Z_A$           | 0.97094 | 0.99924 | 1.00000 | 1.00000 | 1.00000 | 1.00000 | 1.00000 | 1.00000 | 1.00000 | 1.00000 |
|                                       | $Z_C$           | 0.93436 | 0.99447 | 0.99990 | 0.99999 | 1.00000 | 1.00000 | 1.00000 | 1.00000 | 1.00000 | 1.00000 |
|                                       | $Z_K$           | 0.95279 | 0.99799 | 0.99999 | 1.00000 | 1.00000 | 1.00000 | 1.00000 | 1.00000 | 1.00000 | 1.00000 |
|                                       | $M_{A^2}$       | 0.65724 | 0.96645 | 0.99913 | 1.00000 | 1.00000 | 1.00000 | 1.00000 | 1.00000 | 1.00000 | 1.00000 |
|                                       | $AP_{P_1}$      | 0.34628 | 0.45509 | 0.47203 | 0.44379 | 0.46002 | 0.53615 | 0.57132 | 0.65162 | 0.74851 | 0.85457 |
|                                       | $AP_{P_2}$      | 0.25842 | 0.37310 | 0.49149 | 0.55415 | 0.65138 | 0.73482 | 0.80686 | 0.89905 | 0.96535 | 0.99408 |
|                                       | $AP_{P_3}$      | 0.03035 | 0.01284 | 0.24645 | 0.41830 | 0.48170 | 0.65495 | 0.78620 | 0.88790 | 0.96462 | 0.99589 |
|                                       | $AP_{P_4}$      | 0.03123 | 0.01418 | 0.00845 | 0.00496 | 0.00313 | 0.29381 | 0.49368 | 0.72961 | 0.90080 | 0.98114 |
|                                       | $AP_{P_5}$      | 0.03118 | 0.01424 | 0.00853 | 0.00501 | 0.00322 | 0.00116 | 0.43503 | 0.64789 | 0.85295 | 0.97283 |
| $AP_{P_6}$                            | 0.03171         | 0.01489 | 0.00888 | 0.00533 | 0.00371 | 0.00131 | 0.00074 | 0.00014 | 0.39359 | 0.71790 |         |
| $HTD_1$<br>(0.05291)                  | $KS$            | 0.06481 | 0.06602 | 0.06538 | 0.06420 | 0.06584 | 0.06602 | 0.06928 | 0.07362 | 0.07890 | 0.09765 |
|                                       | $A^2$           | 0.07297 | 0.07437 | 0.07952 | 0.08487 | 0.08664 | 0.09253 | 0.09964 | 0.10908 | 0.11621 | 0.15285 |
|                                       | $W^2$           | 0.06687 | 0.06701 | 0.06872 | 0.06872 | 0.07126 | 0.07334 | 0.07678 | 0.08045 | 0.08210 | 0.09814 |
|                                       | $D_1$           | 0.04671 | 0.03770 | 0.03263 | 0.02695 | 0.02604 | 0.02351 | 0.02220 | 0.02304 | 0.02295 | 0.02185 |
|                                       | $D_2$           | 0.03676 | 0.02823 | 0.02472 | 0.02145 | 0.02008 | 0.01671 | 0.01460 | 0.01325 | 0.01192 | 0.01038 |
|                                       | $D_3$           | 0.03670 | 0.02976 | 0.02821 | 0.02569 | 0.02587 | 0.02455 | 0.02399 | 0.02427 | 0.02472 | 0.02309 |
|                                       | $D_4$           | 0.03520 | 0.02784 | 0.02591 | 0.02399 | 0.02347 | 0.02187 | 0.02093 | 0.02142 | 0.02177 | 0.02038 |
|                                       | $D_5$           | 0.04418 | 0.04135 | 0.03094 | 0.02566 | 0.02444 | 0.02294 | 0.02218 | 0.02280 | 0.02322 | 0.02213 |
|                                       | $D_6$           | 0.03764 | 0.03071 | 0.02817 | 0.02600 | 0.02585 | 0.02405 | 0.02279 | 0.02312 | 0.02320 | 0.02199 |
|                                       | $D_7$           | 0.03911 | 0.03252 | 0.03031 | 0.02798 | 0.02691 | 0.02303 | 0.02102 | 0.01779 | 0.01376 | 0.01126 |
|                                       | $D_{n,\lambda}$ | 0.07571 | 0.08569 | 0.09563 | 0.10170 | 0.10520 | 0.11910 | 0.12679 | 0.14872 | 0.16916 | 0.22149 |
|                                       | $Z_A$           | 0.06740 | 0.06371 | 0.06016 | 0.05876 | 0.05584 | 0.05178 | 0.04952 | 0.04931 | 0.04990 | 0.05781 |
|                                       | $Z_C$           | 0.06938 | 0.06733 | 0.07088 | 0.07044 | 0.06942 | 0.07188 | 0.07068 | 0.07665 | 0.08030 | 0.09530 |
|                                       | $Z_K$           | 0.06955 | 0.07278 | 0.07612 | 0.08002 | 0.07664 | 0.08158 | 0.08497 | 0.09321 | 0.10277 | 0.12620 |
|                                       | $M_{A^2}$       | 0.07338 | 0.08037 | 0.08434 | 0.09128 | 0.09277 | 0.10803 | 0.11516 | 0.13848 | 0.16678 | 0.22711 |
|                                       | $AP_{P_1}$      | 0.06985 | 0.07615 | 0.07667 | 0.07905 | 0.07793 | 0.08353 | 0.08957 | 0.09277 | 0.09998 | 0.12334 |
|                                       | $AP_{P_2}$      | 0.04576 | 0.05045 | 0.05474 | 0.05289 | 0.06602 | 0.06902 | 0.07517 | 0.09291 | 0.12276 | 0.16943 |
|                                       | $AP_{P_3}$      | 0.03690 | 0.02979 | 0.03296 | 0.03536 | 0.03301 | 0.03870 | 0.05094 | 0.05612 | 0.07741 | 0.11913 |
|                                       | $AP_{P_4}$      | 0.03733 | 0.02967 | 0.02648 | 0.02375 | 0.02206 | 0.02380 | 0.02566 | 0.03088 | 0.04081 | 0.05569 |
|                                       | $AP_{P_5}$      | 0.03745 | 0.02968 | 0.02639 | 0.02367 | 0.02219 | 0.01844 | 0.02381 | 0.02688 | 0.03250 | 0.05057 |
| $AP_{P_6}$                            | 0.03771         | 0.02976 | 0.02695 | 0.02436 | 0.02327 | 0.02029 | 0.01801 | 0.01656 | 0.01900 | 0.02302 |         |

**Table 2.** The empirical power of tests for different alternatives (2/10)

| Distributions<br>( $R(\theta, \mathbf{P}_5)$ ) | Statistics      | $n=10$  | $n=15$  | $n=20$  | $n=25$  | $n=30$  | $n=40$  | $n=50$  | $n=70$  | $n=100$ | $n=150$ |
|------------------------------------------------|-----------------|---------|---------|---------|---------|---------|---------|---------|---------|---------|---------|
| $HTD_2$<br>(0.06056)                           | $KS$            | 0.05932 | 0.06217 | 0.06347 | 0.06238 | 0.06329 | 0.06515 | 0.06588 | 0.07457 | 0.08021 | 0.09664 |
|                                                | $A^2$           | 0.06387 | 0.06622 | 0.07152 | 0.07353 | 0.07754 | 0.07904 | 0.08480 | 0.09351 | 0.09517 | 0.11609 |
|                                                | $W^2$           | 0.06181 | 0.06337 | 0.06839 | 0.06727 | 0.07153 | 0.07296 | 0.07687 | 0.08283 | 0.08632 | 0.10313 |
|                                                | $D_1$           | 0.04716 | 0.03982 | 0.03763 | 0.03410 | 0.03379 | 0.03319 | 0.03307 | 0.03585 | 0.03631 | 0.03413 |
|                                                | $D_2$           | 0.04049 | 0.03410 | 0.03169 | 0.02828 | 0.02848 | 0.02566 | 0.02411 | 0.02392 | 0.02281 | 0.02109 |
|                                                | $D_3$           | 0.04049 | 0.03600 | 0.03550 | 0.03472 | 0.03543 | 0.03510 | 0.03457 | 0.03692 | 0.03743 | 0.03493 |
|                                                | $D_4$           | 0.04001 | 0.03374 | 0.03215 | 0.03231 | 0.03282 | 0.03265 | 0.03242 | 0.03481 | 0.03565 | 0.03315 |
|                                                | $D_5$           | 0.04522 | 0.04342 | 0.03596 | 0.03296 | 0.03284 | 0.03265 | 0.03282 | 0.03552 | 0.03666 | 0.03452 |
|                                                | $D_6$           | 0.04119 | 0.03656 | 0.03497 | 0.03421 | 0.03472 | 0.03400 | 0.03368 | 0.03595 | 0.03664 | 0.03446 |
|                                                | $D_7$           | 0.04249 | 0.03749 | 0.03642 | 0.03441 | 0.03366 | 0.03159 | 0.03103 | 0.02799 | 0.02462 | 0.02268 |
|                                                | $D_{n,\lambda}$ | 0.06839 | 0.07412 | 0.07731 | 0.08234 | 0.08466 | 0.09095 | 0.09617 | 0.10719 | 0.11372 | 0.13609 |
|                                                | $Z_A$           | 0.05898 | 0.05792 | 0.05568 | 0.05322 | 0.05195 | 0.04839 | 0.04722 | 0.04587 | 0.04409 | 0.04584 |
|                                                | $Z_C$           | 0.05992 | 0.06009 | 0.06158 | 0.05982 | 0.05932 | 0.05922 | 0.05922 | 0.06148 | 0.06005 | 0.06541 |
|                                                | $Z_K$           | 0.06050 | 0.06384 | 0.06285 | 0.06452 | 0.06375 | 0.06570 | 0.06566 | 0.07031 | 0.07098 | 0.07809 |
|                                                | $M_{A^2}$       | 0.06555 | 0.07019 | 0.07129 | 0.07298 | 0.07740 | 0.08315 | 0.09133 | 0.10448 | 0.12234 | 0.16184 |
|                                                | $AP_{P_1}$      | 0.06296 | 0.06843 | 0.06932 | 0.07240 | 0.07334 | 0.07924 | 0.08345 | 0.08518 | 0.09128 | 0.10763 |
|                                                | $AP_{P_2}$      | 0.04598 | 0.04665 | 0.04759 | 0.04730 | 0.05495 | 0.05426 | 0.05839 | 0.06696 | 0.08254 | 0.10310 |
|                                                | $AP_{P_3}$      | 0.04120 | 0.03473 | 0.03588 | 0.03537 | 0.03557 | 0.03777 | 0.04369 | 0.04193 | 0.04864 | 0.06197 |
|                                                | $AP_{P_4}$      | 0.04160 | 0.03589 | 0.03334 | 0.03151 | 0.03151 | 0.03054 | 0.03086 | 0.03291 | 0.03521 | 0.03716 |
|                                                | $AP_{P_5}$      | 0.04168 | 0.03583 | 0.03327 | 0.03169 | 0.03174 | 0.02803 | 0.03005 | 0.03158 | 0.03124 | 0.03621 |
| $AP_{P_6}$                                     | 0.04185         | 0.03558 | 0.03355 | 0.03294 | 0.03252 | 0.03019 | 0.02926 | 0.02980 | 0.02743 | 0.02838 |         |
| $HTD_3$<br>(0.07562)                           | $KS$            | 0.04396 | 0.04764 | 0.04733 | 0.05069 | 0.05055 | 0.05481 | 0.05621 | 0.06312 | 0.07137 | 0.08299 |
|                                                | $A^2$           | 0.04185 | 0.04470 | 0.04120 | 0.04178 | 0.04242 | 0.04186 | 0.04436 | 0.04743 | 0.04684 | 0.05592 |
|                                                | $W^2$           | 0.04392 | 0.04669 | 0.04420 | 0.04671 | 0.04703 | 0.04726 | 0.04965 | 0.05426 | 0.05484 | 0.06538 |
|                                                | $D_1$           | 0.05425 | 0.06065 | 0.06288 | 0.06209 | 0.06466 | 0.06256 | 0.06079 | 0.06079 | 0.06136 | 0.06023 |
|                                                | $D_2$           | 0.06051 | 0.06426 | 0.06965 | 0.06749 | 0.07200 | 0.07259 | 0.07431 | 0.07692 | 0.07799 | 0.07640 |
|                                                | $D_3$           | 0.06074 | 0.06216 | 0.06389 | 0.06035 | 0.06254 | 0.06005 | 0.05872 | 0.05903 | 0.06030 | 0.05882 |
|                                                | $D_4$           | 0.06260 | 0.06348 | 0.06572 | 0.06248 | 0.06435 | 0.06216 | 0.06152 | 0.06205 | 0.06302 | 0.06150 |
|                                                | $D_5$           | 0.05537 | 0.05851 | 0.06332 | 0.06294 | 0.06500 | 0.06177 | 0.06079 | 0.06048 | 0.06112 | 0.06010 |
|                                                | $D_6$           | 0.05930 | 0.06263 | 0.06396 | 0.06112 | 0.06330 | 0.06047 | 0.05967 | 0.06002 | 0.06092 | 0.06045 |
|                                                | $D_7$           | 0.05815 | 0.06177 | 0.06371 | 0.06412 | 0.06248 | 0.06297 | 0.06632 | 0.07156 | 0.07368 | 0.07449 |
|                                                | $D_{n,\lambda}$ | 0.04139 | 0.04137 | 0.03814 | 0.03670 | 0.03757 | 0.03863 | 0.03823 | 0.04429 | 0.04369 | 0.05175 |
|                                                | $Z_A$           | 0.04366 | 0.04807 | 0.04967 | 0.05072 | 0.05434 | 0.05608 | 0.05854 | 0.06298 | 0.06564 | 0.07044 |
|                                                | $Z_C$           | 0.04492 | 0.04539 | 0.04635 | 0.04491 | 0.04732 | 0.05008 | 0.05028 | 0.05580 | 0.05393 | 0.06000 |
|                                                | $Z_K$           | 0.04237 | 0.04567 | 0.04465 | 0.04482 | 0.04354 | 0.04664 | 0.04813 | 0.05227 | 0.05242 | 0.05745 |
|                                                | $M_{A^2}$       | 0.04447 | 0.04495 | 0.04580 | 0.04677 | 0.04739 | 0.05233 | 0.05484 | 0.06403 | 0.06915 | 0.09021 |
|                                                | $AP_{P_1}$      | 0.04494 | 0.04383 | 0.04455 | 0.03903 | 0.04118 | 0.04010 | 0.04243 | 0.04390 | 0.04873 | 0.05546 |
|                                                | $AP_{P_2}$      | 0.05679 | 0.05582 | 0.05831 | 0.06047 | 0.05875 | 0.06184 | 0.06630 | 0.07168 | 0.06923 | 0.08212 |
|                                                | $AP_{P_3}$      | 0.05980 | 0.06230 | 0.06487 | 0.06339 | 0.06567 | 0.06788 | 0.06759 | 0.07387 | 0.07291 | 0.07613 |
|                                                | $AP_{P_4}$      | 0.06018 | 0.06268 | 0.06625 | 0.06410 | 0.06772 | 0.06858 | 0.07154 | 0.07208 | 0.07234 | 0.07586 |
|                                                | $AP_{P_5}$      | 0.06011 | 0.06269 | 0.06605 | 0.06420 | 0.06736 | 0.06853 | 0.07138 | 0.07235 | 0.07347 | 0.07429 |
| $AP_{P_6}$                                     | 0.05975         | 0.06241 | 0.06529 | 0.06309 | 0.06663 | 0.06512 | 0.06612 | 0.06952 | 0.07326 | 0.07127 |         |
| $HTD_4$<br>(0.07693)                           | $KS$            | 0.04683 | 0.05949 | 0.06260 | 0.08280 | 0.08723 | 0.12236 | 0.15504 | 0.24176 | 0.37902 | 0.58715 |
|                                                | $A^2$           | 0.04496 | 0.05217 | 0.04963 | 0.05649 | 0.06010 | 0.06997 | 0.08608 | 0.11971 | 0.17150 | 0.29430 |
|                                                | $W^2$           | 0.04718 | 0.05992 | 0.05913 | 0.07490 | 0.07884 | 0.10046 | 0.12771 | 0.18901 | 0.28453 | 0.46510 |
|                                                | $D_1$           | 0.06127 | 0.06595 | 0.06988 | 0.07174 | 0.07339 | 0.07133 | 0.06651 | 0.06548 | 0.06611 | 0.06404 |
|                                                | $D_2$           | 0.06728 | 0.07272 | 0.07879 | 0.08238 | 0.08648 | 0.09064 | 0.09106 | 0.09391 | 0.09476 | 0.09221 |
|                                                | $D_3$           | 0.06630 | 0.06629 | 0.06864 | 0.06698 | 0.06733 | 0.06630 | 0.06423 | 0.06393 | 0.06481 | 0.06160 |
|                                                | $D_4$           | 0.06944 | 0.06945 | 0.07131 | 0.07114 | 0.07087 | 0.06991 | 0.06804 | 0.06842 | 0.06822 | 0.06593 |
|                                                | $D_5$           | 0.06110 | 0.06218 | 0.06653 | 0.07102 | 0.07153 | 0.06971 | 0.06632 | 0.06473 | 0.06573 | 0.06357 |
|                                                | $D_6$           | 0.06539 | 0.06692 | 0.06910 | 0.06880 | 0.06936 | 0.06799 | 0.06535 | 0.06505 | 0.06560 | 0.06414 |
|                                                | $D_7$           | 0.06501 | 0.06752 | 0.06986 | 0.07348 | 0.07206 | 0.07365 | 0.07721 | 0.08480 | 0.08944 | 0.08957 |
|                                                | $D_{n,\lambda}$ | 0.04102 | 0.04093 | 0.03884 | 0.04054 | 0.04138 | 0.04852 | 0.05276 | 0.06649 | 0.08414 | 0.12576 |
|                                                | $Z_A$           | 0.04553 | 0.05105 | 0.05256 | 0.05632 | 0.06101 | 0.06495 | 0.06829 | 0.07587 | 0.08479 | 0.09826 |
|                                                | $Z_C$           | 0.04576 | 0.04811 | 0.04823 | 0.04855 | 0.05123 | 0.05460 | 0.05641 | 0.06495 | 0.07189 | 0.08697 |
|                                                | $Z_K$           | 0.04404 | 0.04685 | 0.04550 | 0.04628 | 0.04701 | 0.05049 | 0.05345 | 0.05963 | 0.07247 | 0.10555 |
|                                                | $M_{A^2}$       | 0.04842 | 0.05072 | 0.05539 | 0.06240 | 0.06919 | 0.08580 | 0.10128 | 0.13677 | 0.19465 | 0.31220 |
|                                                | $AP_{P_1}$      | 0.04499 | 0.04467 | 0.04177 | 0.03649 | 0.03967 | 0.04115 | 0.04327 | 0.04698 | 0.05555 | 0.06464 |
|                                                | $AP_{P_2}$      | 0.06302 | 0.06171 | 0.06534 | 0.06769 | 0.06320 | 0.07058 | 0.07346 | 0.07800 | 0.07974 | 0.09581 |
|                                                | $AP_{P_3}$      | 0.06586 | 0.06891 | 0.07034 | 0.07276 | 0.07409 | 0.07654 | 0.07489 | 0.07843 | 0.08138 | 0.08600 |
|                                                | $AP_{P_4}$      | 0.06564 | 0.06733 | 0.07051 | 0.07148 | 0.07285 | 0.07722 | 0.07705 | 0.07764 | 0.07935 | 0.08543 |
|                                                | $AP_{P_5}$      | 0.06560 | 0.06714 | 0.07009 | 0.07102 | 0.07262 | 0.07632 | 0.07724 | 0.07795 | 0.07998 | 0.08255 |
| $AP_{P_6}$                                     | 0.06552         | 0.06637 | 0.06917 | 0.06996 | 0.07163 | 0.07189 | 0.07111 | 0.07361 | 0.07859 | 0.07606 |         |

**Table 3.** The empirical power of tests for different alternatives (3/10)

| Distributions<br>( $R(\theta, \mathbf{P}_5)$ ) | Statistics      | $n=10$  | $n=15$  | $n=20$  | $n=25$  | $n=30$  | $n=40$  | $n=50$  | $n=70$  | $n=100$ | $n=150$ |
|------------------------------------------------|-----------------|---------|---------|---------|---------|---------|---------|---------|---------|---------|---------|
| $HTD_5$<br>(0.08175)                           | $KS$            | 0.04053 | 0.04450 | 0.04456 | 0.04703 | 0.04728 | 0.05102 | 0.05174 | 0.05814 | 0.06152 | 0.07482 |
|                                                | $A^2$           | 0.03990 | 0.04012 | 0.03739 | 0.03721 | 0.03772 | 0.03845 | 0.04116 | 0.04497 | 0.04631 | 0.05961 |
|                                                | $W^2$           | 0.04068 | 0.04396 | 0.04220 | 0.04412 | 0.04300 | 0.04429 | 0.04628 | 0.04988 | 0.05000 | 0.05929 |
|                                                | $D_1$           | 0.05723 | 0.06419 | 0.07034 | 0.07486 | 0.07580 | 0.07436 | 0.07006 | 0.07137 | 0.07052 | 0.06778 |
|                                                | $D_2$           | 0.06598 | 0.07244 | 0.08025 | 0.08299 | 0.08787 | 0.09029 | 0.09188 | 0.09803 | 0.09721 | 0.09650 |
|                                                | $D_3$           | 0.06694 | 0.06983 | 0.07271 | 0.07386 | 0.07162 | 0.07054 | 0.06813 | 0.06920 | 0.06736 | 0.06516 |
|                                                | $D_4$           | 0.06965 | 0.07260 | 0.07503 | 0.07728 | 0.07568 | 0.07384 | 0.07306 | 0.07396 | 0.07116 | 0.06977 |
|                                                | $D_5$           | 0.05759 | 0.06138 | 0.07127 | 0.07692 | 0.07622 | 0.07386 | 0.07086 | 0.07083 | 0.07000 | 0.06728 |
|                                                | $D_6$           | 0.06522 | 0.06960 | 0.07267 | 0.07475 | 0.07320 | 0.07179 | 0.06927 | 0.07081 | 0.06959 | 0.06760 |
|                                                | $D_7$           | 0.06400 | 0.06688 | 0.07172 | 0.07617 | 0.07489 | 0.07583 | 0.07978 | 0.08925 | 0.09149 | 0.09338 |
|                                                | $D_{n,\lambda}$ | 0.03849 | 0.03662 | 0.03389 | 0.03241 | 0.03221 | 0.03586 | 0.03839 | 0.04653 | 0.05569 | 0.08001 |
|                                                | $Z_A$           | 0.04046 | 0.04664 | 0.04935 | 0.05371 | 0.05918 | 0.06520 | 0.06919 | 0.07893 | 0.08618 | 0.09919 |
|                                                | $Z_C$           | 0.04197 | 0.04281 | 0.04520 | 0.04517 | 0.04693 | 0.05217 | 0.05440 | 0.06163 | 0.06531 | 0.07779 |
|                                                | $Z_K$           | 0.03989 | 0.04253 | 0.04211 | 0.04134 | 0.04267 | 0.04762 | 0.05018 | 0.05690 | 0.06415 | 0.07595 |
|                                                | $M_{A^2}$       | 0.04121 | 0.04241 | 0.04226 | 0.04576 | 0.04604 | 0.05221 | 0.05774 | 0.07037 | 0.08146 | 0.11343 |
|                                                | $AP_{P_1}$      | 0.04228 | 0.04173 | 0.04103 | 0.03663 | 0.03856 | 0.03923 | 0.04080 | 0.04384 | 0.05138 | 0.06007 |
|                                                | $AP_{P_2}$      | 0.05901 | 0.05935 | 0.06467 | 0.06637 | 0.06383 | 0.07394 | 0.08285 | 0.09421 | 0.10283 | 0.13804 |
|                                                | $AP_{P_3}$      | 0.06467 | 0.07099 | 0.07462 | 0.07662 | 0.08141 | 0.08716 | 0.08725 | 0.10094 | 0.11027 | 0.12547 |
|                                                | $AP_{P_4}$      | 0.06491 | 0.07072 | 0.07668 | 0.08005 | 0.08423 | 0.08833 | 0.09099 | 0.09693 | 0.10089 | 0.11583 |
|                                                | $AP_{P_5}$      | 0.06488 | 0.07049 | 0.07642 | 0.07985 | 0.08374 | 0.08712 | 0.09118 | 0.09720 | 0.10234 | 0.11185 |
| $AP_{P_6}$                                     | 0.06524         | 0.07063 | 0.07516 | 0.07891 | 0.08067 | 0.08150 | 0.08267 | 0.09006 | 0.09454 | 0.09746 |         |
| $HTD_6$<br>(0.08244)                           | $KS$            | 0.05889 | 0.12621 | 0.15559 | 0.30123 | 0.32919 | 0.51774 | 0.66836 | 0.86292 | 0.96645 | 0.99837 |
|                                                | $A^2$           | 0.05368 | 0.09370 | 0.10108 | 0.15683 | 0.17489 | 0.27007 | 0.38283 | 0.61460 | 0.83371 | 0.97412 |
|                                                | $W^2$           | 0.06399 | 0.12268 | 0.14457 | 0.23744 | 0.26722 | 0.40957 | 0.55817 | 0.78630 | 0.94009 | 0.99596 |
|                                                | $D_1$           | 0.08340 | 0.09354 | 0.09766 | 0.10077 | 0.09980 | 0.09138 | 0.08658 | 0.08446 | 0.08283 | 0.07986 |
|                                                | $D_2$           | 0.09061 | 0.10526 | 0.11551 | 0.12618 | 0.13194 | 0.13657 | 0.14213 | 0.14754 | 0.14722 | 0.14335 |
|                                                | $D_3$           | 0.08642 | 0.08706 | 0.08531 | 0.08738 | 0.08414 | 0.07934 | 0.07982 | 0.07951 | 0.07774 | 0.07557 |
|                                                | $D_4$           | 0.09130 | 0.09506 | 0.09296 | 0.09662 | 0.09336 | 0.08781 | 0.08918 | 0.08816 | 0.08605 | 0.08374 |
|                                                | $D_5$           | 0.07635 | 0.08308 | 0.07840 | 0.09021 | 0.09256 | 0.08612 | 0.08466 | 0.08260 | 0.08108 | 0.07832 |
|                                                | $D_6$           | 0.08592 | 0.08995 | 0.08789 | 0.09125 | 0.08794 | 0.08334 | 0.08333 | 0.08310 | 0.08160 | 0.07981 |
|                                                | $D_7$           | 0.08630 | 0.09145 | 0.09499 | 0.10058 | 0.09753 | 0.10005 | 0.11270 | 0.13014 | 0.13682 | 0.13814 |
|                                                | $D_{n,\lambda}$ | 0.03909 | 0.05068 | 0.05148 | 0.06267 | 0.07014 | 0.10914 | 0.14619 | 0.24606 | 0.39222 | 0.63361 |
|                                                | $Z_A$           | 0.04982 | 0.06817 | 0.07369 | 0.08527 | 0.09265 | 0.10762 | 0.12370 | 0.16145 | 0.22291 | 0.34753 |
|                                                | $Z_C$           | 0.04671 | 0.06009 | 0.06221 | 0.07030 | 0.07534 | 0.09061 | 0.10645 | 0.15200 | 0.21486 | 0.36438 |
|                                                | $Z_K$           | 0.04585 | 0.05767 | 0.05641 | 0.07371 | 0.07615 | 0.12425 | 0.19551 | 0.41012 | 0.70672 | 0.91599 |
|                                                | $M_{A^2}$       | 0.06305 | 0.08900 | 0.11793 | 0.15588 | 0.19589 | 0.29013 | 0.38622 | 0.59478 | 0.81494 | 0.97555 |
|                                                | $AP_{P_1}$      | 0.05111 | 0.05495 | 0.05493 | 0.03735 | 0.04858 | 0.05065 | 0.05690 | 0.06997 | 0.09457 | 0.12506 |
|                                                | $AP_{P_2}$      | 0.07733 | 0.08617 | 0.09135 | 0.09348 | 0.09212 | 0.10410 | 0.11408 | 0.13067 | 0.13999 | 0.18486 |
|                                                | $AP_{P_3}$      | 0.08307 | 0.09260 | 0.09819 | 0.09847 | 0.10307 | 0.10624 | 0.10509 | 0.11685 | 0.12850 | 0.14413 |
|                                                | $AP_{P_4}$      | 0.08331 | 0.08871 | 0.09297 | 0.09551 | 0.09915 | 0.10127 | 0.10233 | 0.10755 | 0.11218 | 0.12559 |
|                                                | $AP_{P_5}$      | 0.08305 | 0.08841 | 0.09219 | 0.09445 | 0.09749 | 0.09814 | 0.10217 | 0.10747 | 0.11329 | 0.12041 |
| $AP_{P_6}$                                     | 0.08273         | 0.08665 | 0.08937 | 0.09156 | 0.09271 | 0.08941 | 0.09225 | 0.09545 | 0.10392 | 0.10176 |         |
| $HTD_7$<br>(0.08867)                           | $KS$            | 0.09661 | 0.32213 | 0.40159 | 0.65711 | 0.70483 | 0.88366 | 0.96031 | 0.99776 | 1.00000 | 1.00000 |
|                                                | $A^2$           | 0.09184 | 0.22961 | 0.26480 | 0.44460 | 0.48876 | 0.68076 | 0.82463 | 0.95780 | 0.99671 | 1.00000 |
|                                                | $W^2$           | 0.12168 | 0.29559 | 0.37963 | 0.56817 | 0.64693 | 0.82627 | 0.92450 | 0.98998 | 0.99976 | 1.00000 |
|                                                | $D_1$           | 0.12608 | 0.14123 | 0.14823 | 0.14042 | 0.13879 | 0.12569 | 0.11478 | 0.11059 | 0.10563 | 0.10231 |
|                                                | $D_2$           | 0.12563 | 0.15261 | 0.17059 | 0.18350 | 0.19469 | 0.20484 | 0.21113 | 0.21891 | 0.21729 | 0.21017 |
|                                                | $D_3$           | 0.11305 | 0.11274 | 0.11383 | 0.11004 | 0.10896 | 0.10331 | 0.10158 | 0.10039 | 0.09746 | 0.09445 |
|                                                | $D_4$           | 0.12009 | 0.12683 | 0.12721 | 0.12600 | 0.12423 | 0.11858 | 0.11672 | 0.11535 | 0.11172 | 0.10777 |
|                                                | $D_5$           | 0.10068 | 0.12658 | 0.09315 | 0.10671 | 0.11893 | 0.11223 | 0.10853 | 0.10632 | 0.10179 | 0.09841 |
|                                                | $D_6$           | 0.11500 | 0.12016 | 0.11998 | 0.11843 | 0.11701 | 0.11072 | 0.10811 | 0.10859 | 0.10386 | 0.10154 |
|                                                | $D_7$           | 0.11727 | 0.12864 | 0.13284 | 0.13681 | 0.13455 | 0.14332 | 0.16719 | 0.19508 | 0.20300 | 0.20155 |
|                                                | $D_{n,\lambda}$ | 0.04902 | 0.09840 | 0.10337 | 0.16610 | 0.18813 | 0.31783 | 0.43406 | 0.65277 | 0.83282 | 0.93257 |
|                                                | $Z_A$           | 0.07204 | 0.11254 | 0.12258 | 0.16385 | 0.17599 | 0.23145 | 0.29194 | 0.44145 | 0.65626 | 0.88946 |
|                                                | $Z_C$           | 0.06385 | 0.09843 | 0.10678 | 0.14255 | 0.15236 | 0.21710 | 0.28312 | 0.45959 | 0.67758 | 0.90434 |
|                                                | $Z_K$           | 0.06107 | 0.11786 | 0.13162 | 0.31109 | 0.32673 | 0.55042 | 0.71321 | 0.89135 | 0.98481 | 0.99992 |
|                                                | $M_{A^2}$       | 0.12280 | 0.20719 | 0.31265 | 0.43051 | 0.54110 | 0.74035 | 0.87186 | 0.98058 | 0.99939 | 1.00000 |
|                                                | $AP_{P_1}$      | 0.07539 | 0.08887 | 0.08597 | 0.05206 | 0.07729 | 0.08078 | 0.09515 | 0.12292 | 0.17253 | 0.24726 |
|                                                | $AP_{P_2}$      | 0.10777 | 0.12413 | 0.13546 | 0.13764 | 0.13701 | 0.16202 | 0.18297 | 0.21879 | 0.24529 | 0.33439 |
|                                                | $AP_{P_3}$      | 0.11088 | 0.12556 | 0.13780 | 0.13620 | 0.14479 | 0.15266 | 0.15214 | 0.17928 | 0.19771 | 0.23278 |
|                                                | $AP_{P_4}$      | 0.10911 | 0.11676 | 0.12517 | 0.12456 | 0.13038 | 0.13827 | 0.14002 | 0.14996 | 0.15647 | 0.18105 |
|                                                | $AP_{P_5}$      | 0.10886 | 0.11577 | 0.12369 | 0.12197 | 0.12779 | 0.13372 | 0.13948 | 0.14653 | 0.15616 | 0.16986 |
| $AP_{P_6}$                                     | 0.10784         | 0.11250 | 0.11818 | 0.11598 | 0.11961 | 0.11750 | 0.11821 | 0.12477 | 0.13384 | 0.13542 |         |

**Table 4.** The empirical power of tests for different alternatives (4/10)

| Distributions<br>( $R(\theta, \mathbf{P}_5)$ ) | Statistics      | $n=10$  | $n=15$  | $n=20$  | $n=25$  | $n=30$  | $n=40$  | $n=50$  | $n=70$  | $n=100$ | $n=150$ |
|------------------------------------------------|-----------------|---------|---------|---------|---------|---------|---------|---------|---------|---------|---------|
| $HTD_8$<br>(0.10289)                           | $KS$            | 0.03686 | 0.04048 | 0.04298 | 0.04544 | 0.04551 | 0.04882 | 0.05210 | 0.05708 | 0.06422 | 0.07883 |
|                                                | $A^2$           | 0.02957 | 0.03348 | 0.03133 | 0.03187 | 0.03259 | 0.03400 | 0.03872 | 0.04588 | 0.05416 | 0.08381 |
|                                                | $W^2$           | 0.03547 | 0.04074 | 0.04030 | 0.04180 | 0.04099 | 0.04328 | 0.04684 | 0.05052 | 0.05312 | 0.06702 |
|                                                | $D_1$           | 0.06131 | 0.07578 | 0.09409 | 0.10633 | 0.11633 | 0.12631 | 0.13010 | 0.13622 | 0.13950 | 0.14011 |
|                                                | $D_2$           | 0.07623 | 0.09174 | 0.10926 | 0.12160 | 0.13448 | 0.15248 | 0.16733 | 0.18663 | 0.20294 | 0.21456 |
|                                                | $D_3$           | 0.07753 | 0.09087 | 0.10381 | 0.10979 | 0.11530 | 0.12213 | 0.12550 | 0.12997 | 0.13223 | 0.13006 |
|                                                | $D_4$           | 0.08162 | 0.09384 | 0.10827 | 0.11675 | 0.12319 | 0.13130 | 0.13575 | 0.14317 | 0.14675 | 0.14668 |
|                                                | $D_5$           | 0.06325 | 0.07144 | 0.09640 | 0.11066 | 0.11944 | 0.12738 | 0.13143 | 0.13599 | 0.13893 | 0.13878 |
|                                                | $D_6$           | 0.07542 | 0.08992 | 0.10311 | 0.11031 | 0.11702 | 0.12491 | 0.12839 | 0.13481 | 0.13796 | 0.13935 |
|                                                | $D_7$           | 0.07276 | 0.08277 | 0.09253 | 0.10079 | 0.10520 | 0.11845 | 0.13849 | 0.16745 | 0.18930 | 0.20604 |
|                                                | $D_{n,\lambda}$ | 0.02816 | 0.02502 | 0.02442 | 0.02454 | 0.02668 | 0.03670 | 0.04560 | 0.06730 | 0.09867 | 0.16551 |
|                                                | $Z_A$           | 0.03223 | 0.03939 | 0.04796 | 0.05467 | 0.06528 | 0.08099 | 0.09834 | 0.12537 | 0.15866 | 0.20995 |
|                                                | $Z_C$           | 0.03067 | 0.03423 | 0.03806 | 0.03810 | 0.04411 | 0.05404 | 0.06388 | 0.08565 | 0.10666 | 0.15534 |
|                                                | $Z_K$           | 0.03073 | 0.03191 | 0.03383 | 0.03286 | 0.03628 | 0.04378 | 0.05208 | 0.06699 | 0.08940 | 0.13021 |
|                                                | $M_{A^2}$       | 0.03182 | 0.03370 | 0.03614 | 0.04038 | 0.04406 | 0.05676 | 0.06788 | 0.09417 | 0.12861 | 0.20157 |
|                                                | $AP_{P_1}$      | 0.03251 | 0.03413 | 0.03739 | 0.03383 | 0.03658 | 0.03648 | 0.03917 | 0.04214 | 0.04820 | 0.05802 |
|                                                | $AP_{P_2}$      | 0.06111 | 0.05947 | 0.06750 | 0.07201 | 0.06685 | 0.08103 | 0.09422 | 0.11420 | 0.12901 | 0.18917 |
|                                                | $AP_{P_3}$      | 0.07458 | 0.08963 | 0.09363 | 0.09663 | 0.10814 | 0.12279 | 0.12814 | 0.16648 | 0.20027 | 0.26839 |
|                                                | $AP_{P_4}$      | 0.07557 | 0.08976 | 0.10657 | 0.11945 | 0.12939 | 0.14333 | 0.15565 | 0.18471 | 0.21617 | 0.28188 |
|                                                | $AP_{P_5}$      | 0.07554 | 0.08971 | 0.10613 | 0.11942 | 0.12956 | 0.14944 | 0.15723 | 0.18637 | 0.21861 | 0.27076 |
| $AP_{P_6}$                                     | 0.07531         | 0.08957 | 0.10567 | 0.11852 | 0.12665 | 0.14051 | 0.15281 | 0.17412 | 0.20286 | 0.23341 |         |
| $Lomax(1,2)$<br>(0.14819)                      | $KS$            | 0.33592 | 0.56824 | 0.79846 | 0.88491 | 0.96838 | 0.99780 | 0.99989 | 1.00000 | 1.00000 | 1.00000 |
|                                                | $A^2$           | 0.21983 | 0.41262 | 0.60549 | 0.72168 | 0.87167 | 0.97700 | 0.99774 | 0.99999 | 1.00000 | 1.00000 |
|                                                | $W^2$           | 0.27419 | 0.42612 | 0.60561 | 0.69716 | 0.83469 | 0.95177 | 0.99020 | 0.99977 | 1.00000 | 1.00000 |
|                                                | $D_1$           | 0.42184 | 0.68778 | 0.83620 | 0.85797 | 0.87672 | 0.85720 | 0.85947 | 0.89542 | 0.94663 | 0.97380 |
|                                                | $D_2$           | 0.16956 | 0.22365 | 0.26896 | 0.29457 | 0.32356 | 0.36010 | 0.39318 | 0.45258 | 0.52383 | 0.61635 |
|                                                | $D_3$           | 0.17211 | 0.19837 | 0.22804 | 0.25011 | 0.27766 | 0.31953 | 0.35771 | 0.42790 | 0.50875 | 0.59690 |
|                                                | $D_4$           | 0.13302 | 0.13894 | 0.15019 | 0.16658 | 0.18163 | 0.21699 | 0.25368 | 0.33783 | 0.44670 | 0.58452 |
|                                                | $D_5$           | 0.40460 | 0.72119 | 0.79662 | 0.76652 | 0.72115 | 0.75088 | 0.78689 | 0.86311 | 0.93452 | 0.97150 |
|                                                | $D_6$           | 0.20446 | 0.29500 | 0.33929 | 0.43309 | 0.47584 | 0.58144 | 0.67249 | 0.79503 | 0.88899 | 0.94919 |
|                                                | $D_7$           | 0.23643 | 0.42518 | 0.59597 | 0.66458 | 0.74660 | 0.81583 | 0.85956 | 0.89578 | 0.92091 | 0.94000 |
|                                                | $D_{n,\lambda}$ | 0.01150 | 0.10169 | 0.19717 | 0.27218 | 0.44013 | 0.71801 | 0.88723 | 0.99603 | 1.00000 | 1.00000 |
|                                                | $Z_A$           | 0.27424 | 0.60934 | 0.86793 | 0.96592 | 0.99647 | 0.99999 | 1.00000 | 1.00000 | 1.00000 | 1.00000 |
|                                                | $Z_C$           | 0.15333 | 0.39020 | 0.63905 | 0.79722 | 0.93739 | 0.99704 | 0.99997 | 1.00000 | 1.00000 | 1.00000 |
|                                                | $Z_K$           | 0.25727 | 0.58852 | 0.84905 | 0.94947 | 0.99383 | 0.99997 | 1.00000 | 1.00000 | 1.00000 | 1.00000 |
|                                                | $M_{A^2}$       | 0.06033 | 0.23974 | 0.49296 | 0.73680 | 0.89037 | 0.99061 | 0.99970 | 1.00000 | 1.00000 | 1.00000 |
|                                                | $AP_{P_1}$      | 0.04336 | 0.06033 | 0.07102 | 0.06471 | 0.07379 | 0.08044 | 0.08508 | 0.09435 | 0.11035 | 0.12269 |
|                                                | $AP_{P_2}$      | 0.12989 | 0.12751 | 0.14486 | 0.15792 | 0.15560 | 0.18303 | 0.20539 | 0.24173 | 0.27210 | 0.35873 |
|                                                | $AP_{P_3}$      | 0.18150 | 0.22460 | 0.22942 | 0.22362 | 0.26063 | 0.28912 | 0.31455 | 0.39242 | 0.45759 | 0.58271 |
|                                                | $AP_{P_4}$      | 0.18620 | 0.23331 | 0.28038 | 0.31814 | 0.36301 | 0.38187 | 0.41382 | 0.51436 | 0.59478 | 0.73325 |
|                                                | $AP_{P_5}$      | 0.18647 | 0.23412 | 0.28123 | 0.31940 | 0.36588 | 0.42538 | 0.41874 | 0.52609 | 0.60431 | 0.73601 |
| $AP_{P_6}$                                     | 0.18760         | 0.23589 | 0.28454 | 0.32315 | 0.37148 | 0.43880 | 0.50032 | 0.60728 | 0.66940 | 0.79031 |         |
| $t(2)$<br>(0.17792)                            | $KS$            | 0.02737 | 0.03791 | 0.04035 | 0.04639 | 0.04825 | 0.05975 | 0.06534 | 0.08776 | 0.12148 | 0.20023 |
|                                                | $A^2$           | 0.01307 | 0.02371 | 0.02475 | 0.02882 | 0.03415 | 0.04857 | 0.06840 | 0.12581 | 0.22215 | 0.46885 |
|                                                | $W^2$           | 0.02701 | 0.03855 | 0.03846 | 0.04349 | 0.04546 | 0.05235 | 0.06265 | 0.08390 | 0.11400 | 0.20190 |
|                                                | $D_1$           | 0.08699 | 0.14169 | 0.21527 | 0.28359 | 0.34857 | 0.44384 | 0.50825 | 0.61821 | 0.71979 | 0.80736 |
|                                                | $D_2$           | 0.12912 | 0.18994 | 0.26777 | 0.33419 | 0.41522 | 0.54124 | 0.63822 | 0.77721 | 0.86931 | 0.92324 |
|                                                | $D_3$           | 0.12998 | 0.18728 | 0.25307 | 0.30450 | 0.35572 | 0.43419 | 0.49384 | 0.59493 | 0.68872 | 0.77175 |
|                                                | $D_4$           | 0.14071 | 0.19954 | 0.27250 | 0.33161 | 0.38739 | 0.47702 | 0.54383 | 0.65024 | 0.74435 | 0.82345 |
|                                                | $D_5$           | 0.09257 | 0.12692 | 0.22340 | 0.29931 | 0.36437 | 0.44927 | 0.51312 | 0.61776 | 0.71669 | 0.80221 |
|                                                | $D_6$           | 0.12492 | 0.18258 | 0.25017 | 0.30419 | 0.35788 | 0.44060 | 0.50473 | 0.61407 | 0.71464 | 0.80336 |
|                                                | $D_7$           | 0.11796 | 0.15552 | 0.19598 | 0.24092 | 0.27238 | 0.36285 | 0.49196 | 0.71280 | 0.85036 | 0.91779 |
|                                                | $D_{n,\lambda}$ | 0.01036 | 0.01207 | 0.02170 | 0.03021 | 0.05529 | 0.11585 | 0.17305 | 0.32129 | 0.51585 | 0.77856 |
|                                                | $Z_A$           | 0.01407 | 0.03412 | 0.06069 | 0.09107 | 0.13592 | 0.22347 | 0.31995 | 0.51888 | 0.73438 | 0.92030 |
|                                                | $Z_C$           | 0.00724 | 0.01849 | 0.03504 | 0.05021 | 0.08131 | 0.15041 | 0.22425 | 0.42024 | 0.64334 | 0.88637 |
|                                                | $Z_K$           | 0.01213 | 0.01948 | 0.02507 | 0.03200 | 0.04356 | 0.07522 | 0.11143 | 0.21491 | 0.38029 | 0.64944 |
|                                                | $M_{A^2}$       | 0.01621 | 0.02908 | 0.04904 | 0.07484 | 0.10409 | 0.17351 | 0.24721 | 0.41940 | 0.63529 | 0.87278 |
|                                                | $AP_{P_1}$      | 0.01779 | 0.02662 | 0.03376 | 0.02770 | 0.03363 | 0.03727 | 0.04133 | 0.05035 | 0.06813 | 0.09079 |
|                                                | $AP_{P_2}$      | 0.08687 | 0.08244 | 0.10865 | 0.11935 | 0.12054 | 0.16533 | 0.20415 | 0.27896 | 0.35780 | 0.54181 |
|                                                | $AP_{P_3}$      | 0.12318 | 0.18163 | 0.20398 | 0.20278 | 0.26525 | 0.32600 | 0.38189 | 0.53624 | 0.67240 | 0.85482 |
|                                                | $AP_{P_4}$      | 0.12545 | 0.18693 | 0.26434 | 0.32924 | 0.40375 | 0.45683 | 0.51953 | 0.69432 | 0.81987 | 0.94364 |
|                                                | $AP_{P_5}$      | 0.12539 | 0.18672 | 0.26380 | 0.32891 | 0.40485 | 0.51863 | 0.52083 | 0.70430 | 0.82067 | 0.94235 |
| $AP_{P_6}$                                     | 0.12542         | 0.18625 | 0.26179 | 0.32597 | 0.39683 | 0.50967 | 0.60263 | 0.75388 | 0.84626 | 0.94524 |         |

**Table 5.** The empirical power of tests for different alternatives (5/10)

| Distributions<br>( $R(\theta, \mathbf{P}_5)$ ) | Statistics          | $n=10$  | $n=15$  | $n=20$  | $n=25$  | $n=30$  | $n=40$  | $n=50$  | $n=70$  | $n=100$ | $n=150$ |
|------------------------------------------------|---------------------|---------|---------|---------|---------|---------|---------|---------|---------|---------|---------|
| LogNormal(0,1)<br>(0.19817)                    | $KS$                | 0.22536 | 0.40229 | 0.62433 | 0.73461 | 0.88441 | 0.98090 | 0.99737 | 0.99997 | 1.00000 | 1.00000 |
|                                                | $A^2$               | 0.13548 | 0.28203 | 0.43648 | 0.54840 | 0.72335 | 0.91047 | 0.98165 | 0.99968 | 1.00000 | 1.00000 |
|                                                | $W^2$               | 0.19004 | 0.30714 | 0.45234 | 0.53745 | 0.68286 | 0.85424 | 0.94775 | 0.99638 | 0.99998 | 1.00000 |
|                                                | $D_1$               | 0.34221 | 0.62321 | 0.81623 | 0.87781 | 0.92135 | 0.94336 | 0.96031 | 0.98538 | 0.99763 | 0.99976 |
|                                                | $D_2$               | 0.20573 | 0.30777 | 0.40730 | 0.47204 | 0.54195 | 0.64041 | 0.71297 | 0.82405 | 0.91418 | 0.97082 |
|                                                | $D_3$               | 0.20594 | 0.26986 | 0.33860 | 0.39264 | 0.44940 | 0.54488 | 0.61789 | 0.74094 | 0.84623 | 0.92615 |
|                                                | $D_4$               | 0.16989 | 0.20683 | 0.24922 | 0.29441 | 0.33896 | 0.43834 | 0.52536 | 0.68961 | 0.83984 | 0.94298 |
|                                                | $D_5$               | 0.33921 | 0.62439 | 0.79022 | 0.82501 | 0.83519 | 0.89626 | 0.93514 | 0.97892 | 0.99675 | 0.99970 |
|                                                | $D_6$               | 0.22958 | 0.35396 | 0.45113 | 0.57462 | 0.64916 | 0.78774 | 0.87351 | 0.95856 | 0.99105 | 0.99896 |
|                                                | $D_7$               | 0.26465 | 0.51476 | 0.75330 | 0.84482 | 0.91723 | 0.96513 | 0.98254 | 0.99361 | 0.99783 | 0.99927 |
|                                                | $D_{n,\lambda}$     | 0.00816 | 0.08556 | 0.18254 | 0.25618 | 0.42109 | 0.70226 | 0.87597 | 0.99423 | 0.99998 | 1.00000 |
|                                                | $Z_A$               | 0.16939 | 0.44854 | 0.73177 | 0.89363 | 0.97908 | 0.99962 | 1.00000 | 1.00000 | 1.00000 | 1.00000 |
|                                                | $Z_C$               | 0.08683 | 0.26794 | 0.49082 | 0.66397 | 0.85505 | 0.98579 | 0.99929 | 0.99999 | 1.00000 | 1.00000 |
|                                                | $Z_K$               | 0.15609 | 0.41312 | 0.68911 | 0.85105 | 0.96584 | 0.99916 | 1.00000 | 1.00000 | 1.00000 | 1.00000 |
|                                                | $M_{A^2}$           | 0.05124 | 0.20610 | 0.43294 | 0.65871 | 0.82429 | 0.97293 | 0.99757 | 0.99998 | 1.00000 | 1.00000 |
|                                                | $AP_{\mathbf{P}_1}$ | 0.03199 | 0.04912 | 0.06191 | 0.05211 | 0.06172 | 0.06987 | 0.07677 | 0.09118 | 0.11471 | 0.13917 |
|                                                | $AP_{\mathbf{P}_2}$ | 0.14409 | 0.14153 | 0.17335 | 0.19143 | 0.19309 | 0.24272 | 0.28499 | 0.35292 | 0.42411 | 0.57811 |
|                                                | $AP_{\mathbf{P}_3}$ | 0.21105 | 0.28990 | 0.30709 | 0.30113 | 0.37248 | 0.42981 | 0.48591 | 0.61697 | 0.72688 | 0.87346 |
|                                                | $AP_{\mathbf{P}_4}$ | 0.21633 | 0.30309 | 0.39625 | 0.46706 | 0.54535 | 0.58562 | 0.64137 | 0.79326 | 0.88527 | 0.96711 |
|                                                | $AP_{\mathbf{P}_5}$ | 0.21668 | 0.30369 | 0.39721 | 0.46966 | 0.55216 | 0.65893 | 0.64578 | 0.80776 | 0.89126 | 0.96955 |
| $AP_{\mathbf{P}_6}$                            | 0.21824             | 0.30597 | 0.40011 | 0.47564 | 0.55947 | 0.68434 | 0.77351 | 0.89628 | 0.93429 | 0.98779 |         |
| Laplace(0,1)<br>(0.22247)                      | $KS$                | 0.02760 | 0.03541 | 0.03976 | 0.04387 | 0.04501 | 0.05488 | 0.06171 | 0.08537 | 0.13190 | 0.25686 |
|                                                | $A^2$               | 0.01188 | 0.02318 | 0.02576 | 0.03141 | 0.04002 | 0.06477 | 0.09770 | 0.19681 | 0.37865 | 0.73181 |
|                                                | $W^2$               | 0.02704 | 0.03778 | 0.03952 | 0.04519 | 0.04637 | 0.05762 | 0.06789 | 0.09502 | 0.14002 | 0.26004 |
|                                                | $D_1$               | 0.10170 | 0.19058 | 0.33199 | 0.48807 | 0.63816 | 0.83840 | 0.93490 | 0.99277 | 0.99982 | 1.00000 |
|                                                | $D_2$               | 0.15961 | 0.26691 | 0.40153 | 0.52285 | 0.66110 | 0.84433 | 0.94510 | 0.99695 | 1.00000 | 1.00000 |
|                                                | $D_3$               | 0.16433 | 0.27885 | 0.42966 | 0.56293 | 0.69127 | 0.85891 | 0.94301 | 0.99387 | 0.99976 | 1.00000 |
|                                                | $D_4$               | 0.17620 | 0.29477 | 0.45447 | 0.60158 | 0.73424 | 0.89687 | 0.96685 | 0.99795 | 0.99999 | 1.00000 |
|                                                | $D_5$               | 0.10965 | 0.17051 | 0.34942 | 0.51767 | 0.66999 | 0.85145 | 0.94064 | 0.99314 | 0.99981 | 1.00000 |
|                                                | $D_6$               | 0.15694 | 0.26712 | 0.41699 | 0.54875 | 0.68002 | 0.85025 | 0.93854 | 0.99303 | 0.99981 | 1.00000 |
|                                                | $D_7$               | 0.14528 | 0.20907 | 0.27248 | 0.35287 | 0.41569 | 0.60969 | 0.82536 | 0.98848 | 0.99998 | 1.00000 |
|                                                | $D_{n,\lambda}$     | 0.00773 | 0.01321 | 0.03230 | 0.05111 | 0.09732 | 0.21611 | 0.32979 | 0.57579 | 0.82439 | 0.98028 |
|                                                | $Z_A$               | 0.01383 | 0.03672 | 0.07789 | 0.13123 | 0.21023 | 0.39521 | 0.59315 | 0.88089 | 0.99159 | 0.99999 |
|                                                | $Z_C$               | 0.00711 | 0.02169 | 0.05025 | 0.08117 | 0.13909 | 0.29523 | 0.46458 | 0.80225 | 0.97527 | 0.99989 |
|                                                | $Z_K$               | 0.01051 | 0.01801 | 0.02508 | 0.03159 | 0.04620 | 0.09582 | 0.16592 | 0.38818 | 0.73492 | 0.97959 |
|                                                | $M_{A^2}$           | 0.01573 | 0.03381 | 0.06075 | 0.09807 | 0.13951 | 0.24872 | 0.37254 | 0.63411 | 0.87974 | 0.99304 |
|                                                | $AP_{\mathbf{P}_1}$ | 0.01473 | 0.02652 | 0.03388 | 0.02951 | 0.03301 | 0.03684 | 0.03913 | 0.04481 | 0.05272 | 0.06364 |
|                                                | $AP_{\mathbf{P}_2}$ | 0.10464 | 0.08786 | 0.11380 | 0.12454 | 0.12310 | 0.16538 | 0.20460 | 0.27515 | 0.35268 | 0.52934 |
|                                                | $AP_{\mathbf{P}_3}$ | 0.15504 | 0.25017 | 0.26074 | 0.25430 | 0.34949 | 0.42107 | 0.51269 | 0.69727 | 0.83011 | 0.96077 |
|                                                | $AP_{\mathbf{P}_4}$ | 0.15683 | 0.26705 | 0.41073 | 0.53363 | 0.65422 | 0.68398 | 0.78346 | 0.94116 | 0.98812 | 0.99950 |
|                                                | $AP_{\mathbf{P}_5}$ | 0.15675 | 0.26763 | 0.41266 | 0.54020 | 0.67127 | 0.80452 | 0.79111 | 0.95662 | 0.99075 | 0.99973 |
| $AP_{\mathbf{P}_6}$                            | 0.15726             | 0.26805 | 0.41730 | 0.55503 | 0.69961 | 0.87654 | 0.96021 | 0.99753 | 0.99937 | 1.00000 |         |
| $t(3)$<br>(0.22893)                            | $KS$                | 0.02642 | 0.03722 | 0.04467 | 0.05224 | 0.05790 | 0.07556 | 0.09362 | 0.14192 | 0.23727 | 0.44730 |
|                                                | $A^2$               | 0.01203 | 0.02481 | 0.02841 | 0.03880 | 0.05061 | 0.08817 | 0.14224 | 0.28913 | 0.53528 | 0.86684 |
|                                                | $W^2$               | 0.02597 | 0.03908 | 0.04291 | 0.05293 | 0.05676 | 0.07388 | 0.09514 | 0.14726 | 0.24503 | 0.47820 |
|                                                | $D_1$               | 0.11409 | 0.21736 | 0.34556 | 0.47885 | 0.58159 | 0.72634 | 0.80606 | 0.90049 | 0.95758 | 0.98382 |
|                                                | $D_2$               | 0.18121 | 0.29908 | 0.43259 | 0.55477 | 0.67173 | 0.82861 | 0.91267 | 0.97507 | 0.99259 | 0.99741 |
|                                                | $D_3$               | 0.18183 | 0.29516 | 0.41206 | 0.51503 | 0.59523 | 0.71531 | 0.79009 | 0.88328 | 0.94083 | 0.97200 |
|                                                | $D_4$               | 0.19801 | 0.31739 | 0.44477 | 0.56126 | 0.64555 | 0.76898 | 0.84055 | 0.92024 | 0.96339 | 0.98506 |
|                                                | $D_5$               | 0.12301 | 0.19163 | 0.35893 | 0.50502 | 0.60758 | 0.73412 | 0.81098 | 0.90004 | 0.95598 | 0.98246 |
|                                                | $D_6$               | 0.17309 | 0.28659 | 0.40607 | 0.51187 | 0.59818 | 0.72356 | 0.80288 | 0.89778 | 0.95496 | 0.98274 |
|                                                | $D_7$               | 0.16175 | 0.23401 | 0.29899 | 0.38473 | 0.43559 | 0.59380 | 0.78070 | 0.95597 | 0.99102 | 0.99743 |
|                                                | $D_{n,\lambda}$     | 0.00565 | 0.01305 | 0.03657 | 0.05968 | 0.11983 | 0.26529 | 0.39780 | 0.65194 | 0.87412 | 0.98637 |
|                                                | $Z_A$               | 0.01400 | 0.04325 | 0.09512 | 0.16210 | 0.24803 | 0.44017 | 0.61484 | 0.85529 | 0.97583 | 0.99925 |
|                                                | $Z_C$               | 0.00724 | 0.02501 | 0.06173 | 0.10028 | 0.16842 | 0.33803 | 0.50106 | 0.79103 | 0.95640 | 0.99864 |
|                                                | $Z_K$               | 0.01045 | 0.02016 | 0.03091 | 0.04179 | 0.06469 | 0.13458 | 0.22322 | 0.44830 | 0.73819 | 0.95743 |
|                                                | $M_{A^2}$           | 0.01845 | 0.04584 | 0.08778 | 0.14272 | 0.20414 | 0.35286 | 0.49947 | 0.75116 | 0.93312 | 0.99640 |
|                                                | $AP_{\mathbf{P}_1}$ | 0.01641 | 0.02856 | 0.03750 | 0.02821 | 0.03608 | 0.04181 | 0.04913 | 0.06350 | 0.09260 | 0.13176 |
|                                                | $AP_{\mathbf{P}_2}$ | 0.11589 | 0.11166 | 0.15305 | 0.17560 | 0.18089 | 0.25782 | 0.32796 | 0.45145 | 0.58302 | 0.79690 |
|                                                | $AP_{\mathbf{P}_3}$ | 0.17033 | 0.28514 | 0.31349 | 0.32457 | 0.43132 | 0.53285 | 0.63537 | 0.81117 | 0.92042 | 0.98969 |
|                                                | $AP_{\mathbf{P}_4}$ | 0.17363 | 0.29510 | 0.42893 | 0.54855 | 0.65779 | 0.72262 | 0.80630 | 0.94120 | 0.98681 | 0.99938 |
|                                                | $AP_{\mathbf{P}_5}$ | 0.17339 | 0.29490 | 0.42864 | 0.55015 | 0.66321 | 0.80234 | 0.80708 | 0.94779 | 0.98662 | 0.99935 |
| $AP_{\mathbf{P}_6}$                            | 0.17332             | 0.29360 | 0.42668 | 0.54813 | 0.65921 | 0.80557 | 0.89258 | 0.97076 | 0.99031 | 0.99950 |         |

**Table 6.** The empirical power of tests for different alternatives (6/10)

| Distributions<br>( $R(\theta, P_5)$ ) | Statistics      | $n=10$  | $n=15$  | $n=20$  | $n=25$  | $n=30$  | $n=40$  | $n=50$  | $n=70$  | $n=100$ | $n=150$ |
|---------------------------------------|-----------------|---------|---------|---------|---------|---------|---------|---------|---------|---------|---------|
| Gamma(0.5,1)<br>(0.23355)             | $KS$            | 0.44799 | 0.71082 | 0.90946 | 0.96315 | 0.99452 | 0.99992 | 1.00000 | 1.00000 | 1.00000 | 1.00000 |
|                                       | $A^2$           | 0.27937 | 0.50223 | 0.71615 | 0.82639 | 0.94474 | 0.99530 | 0.99974 | 1.00000 | 1.00000 | 1.00000 |
|                                       | $W^2$           | 0.35364 | 0.52566 | 0.72588 | 0.81595 | 0.92740 | 0.98764 | 0.99865 | 0.99998 | 1.00000 | 1.00000 |
|                                       | $D_1$           | 0.62902 | 0.89371 | 0.97746 | 0.99152 | 0.99683 | 0.99874 | 0.99952 | 0.99999 | 1.00000 | 1.00000 |
|                                       | $D_2$           | 0.22627 | 0.33722 | 0.44236 | 0.51956 | 0.60307 | 0.72821 | 0.82136 | 0.93469 | 0.99029 | 0.99971 |
|                                       | $D_3$           | 0.23521 | 0.30745 | 0.39343 | 0.47236 | 0.55327 | 0.69357 | 0.79485 | 0.92055 | 0.98395 | 0.99880 |
|                                       | $D_4$           | 0.17255 | 0.21038 | 0.26120 | 0.32465 | 0.38873 | 0.53494 | 0.66704 | 0.86966 | 0.98066 | 0.99951 |
|                                       | $D_5$           | 0.60670 | 0.91118 | 0.96576 | 0.97231 | 0.97035 | 0.98942 | 0.99681 | 0.99994 | 1.00000 | 1.00000 |
|                                       | $D_6$           | 0.29458 | 0.47846 | 0.58507 | 0.74804 | 0.82463 | 0.94302 | 0.98567 | 0.99949 | 1.00000 | 1.00000 |
|                                       | $D_7$           | 0.32982 | 0.61870 | 0.83576 | 0.91676 | 0.97178 | 0.99589 | 0.99949 | 0.99998 | 1.00000 | 1.00000 |
|                                       | $D_{n,\lambda}$ | 0.01440 | 0.18054 | 0.35418 | 0.46712 | 0.67857 | 0.90875 | 0.98307 | 0.99997 | 1.00000 | 1.00000 |
|                                       | $Z_A$           | 0.35854 | 0.72263 | 0.93946 | 0.99035 | 0.99949 | 1.00000 | 1.00000 | 1.00000 | 1.00000 | 1.00000 |
|                                       | $Z_C$           | 0.21620 | 0.51852 | 0.78700 | 0.91358 | 0.98611 | 0.99992 | 1.00000 | 1.00000 | 1.00000 | 1.00000 |
|                                       | $Z_K$           | 0.35917 | 0.72585 | 0.93684 | 0.98638 | 0.99920 | 1.00000 | 1.00000 | 1.00000 | 1.00000 | 1.00000 |
|                                       | $M_{A^2}$       | 0.12469 | 0.45924 | 0.77127 | 0.93391 | 0.98527 | 0.99973 | 0.99999 | 1.00000 | 1.00000 | 1.00000 |
|                                       | $AP_{P_1}$      | 0.04576 | 0.06762 | 0.08300 | 0.07152 | 0.08499 | 0.09656 | 0.10450 | 0.12148 | 0.14955 | 0.17740 |
|                                       | $AP_{P_2}$      | 0.18249 | 0.17652 | 0.21371 | 0.23401 | 0.24231 | 0.29981 | 0.34332 | 0.42834 | 0.51066 | 0.67204 |
|                                       | $AP_{P_3}$      | 0.25079 | 0.35035 | 0.36796 | 0.36549 | 0.44913 | 0.52296 | 0.59536 | 0.73359 | 0.84158 | 0.95040 |
|                                       | $AP_{P_4}$      | 0.25700 | 0.36624 | 0.48162 | 0.57635 | 0.66812 | 0.70316 | 0.77595 | 0.91213 | 0.97164 | 0.99686 |
|                                       | $AP_{P_5}$      | 0.25722 | 0.36716 | 0.48369 | 0.58010 | 0.67864 | 0.79133 | 0.78133 | 0.92653 | 0.97549 | 0.99776 |
| $AP_{P_6}$                            | 0.25882         | 0.36894 | 0.49000 | 0.59152 | 0.69465 | 0.83998 | 0.92333 | 0.98588 | 0.99445 | 0.99987 |         |
| Logistic(4,3)<br>(0.25412)            | $KS$            | 0.05150 | 0.08605 | 0.13400 | 0.17113 | 0.24654 | 0.40183 | 0.56077 | 0.83472 | 0.98238 | 0.99988 |
|                                       | $A^2$           | 0.02599 | 0.06515 | 0.09647 | 0.13430 | 0.20602 | 0.35867 | 0.53872 | 0.83499 | 0.98152 | 0.99997 |
|                                       | $W^2$           | 0.05055 | 0.08551 | 0.11481 | 0.14377 | 0.18927 | 0.28017 | 0.38760 | 0.61196 | 0.85044 | 0.98836 |
|                                       | $D_1$           | 0.17970 | 0.37809 | 0.59961 | 0.75517 | 0.85265 | 0.93573 | 0.96600 | 0.98990 | 0.99801 | 0.99963 |
|                                       | $D_2$           | 0.24368 | 0.41858 | 0.60119 | 0.73070 | 0.82972 | 0.92469 | 0.96210 | 0.98727 | 0.99555 | 0.99876 |
|                                       | $D_3$           | 0.24345 | 0.39605 | 0.53402 | 0.63657 | 0.71332 | 0.81528 | 0.86984 | 0.93203 | 0.96892 | 0.98836 |
|                                       | $D_4$           | 0.24807 | 0.38857 | 0.51606 | 0.62077 | 0.70008 | 0.81213 | 0.87683 | 0.94435 | 0.97966 | 0.99384 |
|                                       | $D_5$           | 0.19166 | 0.34228 | 0.60594 | 0.75793 | 0.84011 | 0.92656 | 0.96098 | 0.98853 | 0.99783 | 0.99962 |
|                                       | $D_6$           | 0.23744 | 0.40935 | 0.56653 | 0.69848 | 0.78500 | 0.89539 | 0.94402 | 0.98396 | 0.99629 | 0.99940 |
|                                       | $D_7$           | 0.23496 | 0.41403 | 0.62220 | 0.79839 | 0.89988 | 0.98425 | 0.99662 | 0.99916 | 0.99965 | 0.99988 |
|                                       | $D_{n,\lambda}$ | 0.00421 | 0.02993 | 0.09120 | 0.14561 | 0.28073 | 0.53384 | 0.72764 | 0.94564 | 0.99781 | 1.00000 |
|                                       | $Z_A$           | 0.03234 | 0.12059 | 0.27071 | 0.44652 | 0.65001 | 0.90027 | 0.98327 | 0.99989 | 1.00000 | 1.00000 |
|                                       | $Z_C$           | 0.01603 | 0.06979 | 0.17022 | 0.28107 | 0.45539 | 0.75352 | 0.91648 | 0.99728 | 1.00000 | 1.00000 |
|                                       | $Z_K$           | 0.02498 | 0.07039 | 0.14135 | 0.23198 | 0.39778 | 0.72467 | 0.91804 | 0.99838 | 1.00000 | 1.00000 |
|                                       | $M_{A^2}$       | 0.02830 | 0.10265 | 0.22030 | 0.37004 | 0.51412 | 0.76346 | 0.90515 | 0.99202 | 0.99995 | 1.00000 |
|                                       | $AP_{P_1}$      | 0.01924 | 0.03482 | 0.04591 | 0.03265 | 0.04503 | 0.05145 | 0.06019 | 0.08081 | 0.11523 | 0.16450 |
|                                       | $AP_{P_2}$      | 0.14869 | 0.14821 | 0.19600 | 0.22671 | 0.24045 | 0.32811 | 0.40764 | 0.54113 | 0.67458 | 0.86315 |
|                                       | $AP_{P_3}$      | 0.23046 | 0.37516 | 0.40406 | 0.41744 | 0.54338 | 0.63753 | 0.73748 | 0.87790 | 0.95384 | 0.99518 |
|                                       | $AP_{P_4}$      | 0.23552 | 0.39894 | 0.55433 | 0.67095 | 0.77169 | 0.81531 | 0.88298 | 0.96933 | 0.99336 | 0.99969 |
|                                       | $AP_{P_5}$      | 0.23573 | 0.39963 | 0.55620 | 0.67469 | 0.77772 | 0.87923 | 0.88354 | 0.97359 | 0.99336 | 0.99970 |
| $AP_{P_6}$                            | 0.23666         | 0.40176 | 0.55975 | 0.67988 | 0.78102 | 0.89349 | 0.94700 | 0.98745 | 0.99558 | 0.99985 |         |
| Logistic(0,1)<br>(0.29015)            | $KS$            | 0.02720 | 0.04187 | 0.05158 | 0.06256 | 0.07529 | 0.11201 | 0.15274 | 0.27395 | 0.50000 | 0.83615 |
|                                       | $A^2$           | 0.01211 | 0.03182 | 0.04132 | 0.06066 | 0.09351 | 0.18540 | 0.31423 | 0.60899 | 0.88412 | 0.99602 |
|                                       | $W^2$           | 0.02696 | 0.04721 | 0.05358 | 0.06839 | 0.08123 | 0.12070 | 0.17062 | 0.30526 | 0.52035 | 0.83760 |
|                                       | $D_1$           | 0.15839 | 0.34182 | 0.57153 | 0.76411 | 0.88228 | 0.97572 | 0.99519 | 0.99985 | 1.00000 | 1.00000 |
|                                       | $D_2$           | 0.26242 | 0.46435 | 0.66950 | 0.81410 | 0.91243 | 0.98568 | 0.99843 | 0.99999 | 1.00000 | 1.00000 |
|                                       | $D_3$           | 0.26458 | 0.47061 | 0.67775 | 0.81765 | 0.90469 | 0.97778 | 0.99555 | 0.99990 | 1.00000 | 1.00000 |
|                                       | $D_4$           | 0.28688 | 0.50601 | 0.72174 | 0.86371 | 0.93704 | 0.99005 | 0.99883 | 0.99998 | 1.00000 | 1.00000 |
|                                       | $D_5$           | 0.17216 | 0.29920 | 0.59190 | 0.79329 | 0.90232 | 0.97909 | 0.99597 | 0.99986 | 1.00000 | 1.00000 |
|                                       | $D_6$           | 0.25132 | 0.45408 | 0.66527 | 0.80794 | 0.90111 | 0.97721 | 0.99539 | 0.99986 | 1.00000 | 1.00000 |
|                                       | $D_7$           | 0.23106 | 0.35857 | 0.46701 | 0.59657 | 0.67796 | 0.86875 | 0.97774 | 0.99993 | 1.00000 | 1.00000 |
|                                       | $D_{n,\lambda}$ | 0.00316 | 0.02002 | 0.07555 | 0.13323 | 0.27575 | 0.54929 | 0.73597 | 0.94025 | 0.99626 | 0.99999 |
|                                       | $Z_A$           | 0.01603 | 0.06740 | 0.17269 | 0.30927 | 0.47657 | 0.76254 | 0.92007 | 0.99615 | 1.00000 | 1.00000 |
|                                       | $Z_C$           | 0.00881 | 0.04283 | 0.12090 | 0.21351 | 0.36361 | 0.66426 | 0.85629 | 0.99011 | 0.99995 | 1.00000 |
|                                       | $Z_K$           | 0.01048 | 0.02442 | 0.04144 | 0.06464 | 0.11089 | 0.26349 | 0.45713 | 0.81288 | 0.98451 | 0.99999 |
|                                       | $M_{A^2}$       | 0.02484 | 0.07668 | 0.16049 | 0.26924 | 0.38424 | 0.62665 | 0.80152 | 0.96638 | 0.99879 | 1.00000 |
|                                       | $AP_{P_1}$      | 0.01771 | 0.03243 | 0.04269 | 0.03000 | 0.04179 | 0.04986 | 0.06001 | 0.08278 | 0.12254 | 0.18204 |
|                                       | $AP_{P_2}$      | 0.15836 | 0.15500 | 0.21212 | 0.25205 | 0.26709 | 0.37807 | 0.47789 | 0.64399 | 0.78925 | 0.94365 |
|                                       | $AP_{P_3}$      | 0.24647 | 0.43264 | 0.46375 | 0.49156 | 0.64507 | 0.75777 | 0.86207 | 0.96559 | 0.99428 | 0.99995 |
|                                       | $AP_{P_4}$      | 0.25117 | 0.46280 | 0.67478 | 0.81181 | 0.90348 | 0.93407 | 0.97609 | 0.99898 | 1.00000 | 1.00000 |
|                                       | $AP_{P_5}$      | 0.25135 | 0.46372 | 0.67754 | 0.81789 | 0.91406 | 0.97462 | 0.97741 | 0.99943 | 1.00000 | 1.00000 |
| $AP_{P_6}$                            | 0.25173         | 0.46405 | 0.68335 | 0.82887 | 0.92727 | 0.99009 | 0.99898 | 0.99999 | 1.00000 | 1.00000 |         |

**Table 7.** The empirical power of tests for different alternatives (7/10)

| Distributions<br>( $R(\theta, P_5)$ ) | Statistics      | $n=10$  | $n=15$  | $n=20$  | $n=25$  | $n=30$  | $n=40$  | $n=50$  | $n=70$  | $n=100$ | $n=150$ |
|---------------------------------------|-----------------|---------|---------|---------|---------|---------|---------|---------|---------|---------|---------|
| $t(10)$<br>(0.30443)                  | $KS$            | 0.02776 | 0.04359 | 0.05667 | 0.06824 | 0.08443 | 0.13056 | 0.18089 | 0.33204 | 0.59054 | 0.90641 |
|                                       | $A^2$           | 0.01314 | 0.03451 | 0.04641 | 0.06821 | 0.10976 | 0.22257 | 0.37635 | 0.68599 | 0.92880 | 0.99887 |
|                                       | $W^2$           | 0.02808 | 0.04948 | 0.05833 | 0.07480 | 0.09083 | 0.13720 | 0.20284 | 0.36248 | 0.60401 | 0.90058 |
|                                       | $D_1$           | 0.17114 | 0.37597 | 0.61507 | 0.80672 | 0.91258 | 0.98338 | 0.99685 | 0.99987 | 1.00000 | 1.00000 |
|                                       | $D_2$           | 0.28426 | 0.50618 | 0.71184 | 0.84891 | 0.93734 | 0.99122 | 0.99937 | 1.00000 | 1.00000 | 1.00000 |
|                                       | $D_3$           | 0.28586 | 0.51532 | 0.72060 | 0.85555 | 0.92960 | 0.98439 | 0.99662 | 0.99981 | 0.99998 | 1.00000 |
|                                       | $D_4$           | 0.31170 | 0.55258 | 0.76419 | 0.89468 | 0.95568 | 0.99278 | 0.99896 | 0.99997 | 1.00000 | 1.00000 |
|                                       | $D_5$           | 0.18590 | 0.32917 | 0.63623 | 0.83405 | 0.92947 | 0.98602 | 0.99731 | 0.99988 | 1.00000 | 1.00000 |
|                                       | $D_6$           | 0.27181 | 0.49715 | 0.70847 | 0.84644 | 0.92738 | 0.98420 | 0.99690 | 0.99987 | 1.00000 | 1.00000 |
|                                       | $D_7$           | 0.25002 | 0.39040 | 0.50434 | 0.64059 | 0.73179 | 0.90463 | 0.98635 | 0.99996 | 1.00000 | 1.00000 |
|                                       | $D_{n,\lambda}$ | 0.00301 | 0.02236 | 0.08912 | 0.16041 | 0.33027 | 0.61765 | 0.80030 | 0.96386 | 0.99854 | 1.00000 |
|                                       | $Z_A$           | 0.01727 | 0.07538 | 0.19702 | 0.35254 | 0.54320 | 0.81868 | 0.94920 | 0.99859 | 1.00000 | 1.00000 |
|                                       | $Z_C$           | 0.00981 | 0.04843 | 0.14127 | 0.24890 | 0.42658 | 0.72977 | 0.90007 | 0.99522 | 0.99999 | 1.00000 |
|                                       | $Z_K$           | 0.01075 | 0.02588 | 0.04721 | 0.07485 | 0.13437 | 0.31612 | 0.52994 | 0.86881 | 0.99301 | 1.00000 |
|                                       | $M_{A^2}$       | 0.02781 | 0.08796 | 0.18280 | 0.30941 | 0.44113 | 0.68910 | 0.85381 | 0.98007 | 0.99968 | 1.00000 |
|                                       | $AP_{P_1}$      | 0.01894 | 0.03440 | 0.04371 | 0.02971 | 0.04499 | 0.05406 | 0.06450 | 0.08966 | 0.13511 | 0.20441 |
|                                       | $AP_{P_2}$      | 0.17183 | 0.16915 | 0.23053 | 0.27579 | 0.29903 | 0.41865 | 0.52950 | 0.69565 | 0.83793 | 0.96603 |
|                                       | $AP_{P_3}$      | 0.26545 | 0.46912 | 0.50434 | 0.53593 | 0.69988 | 0.80377 | 0.89996 | 0.97921 | 0.99772 | 0.99999 |
|                                       | $AP_{P_4}$      | 0.27102 | 0.50292 | 0.71827 | 0.84675 | 0.92928 | 0.95670 | 0.98604 | 0.99953 | 1.00000 | 1.00000 |
|                                       | $AP_{P_5}$      | 0.27113 | 0.50406 | 0.72074 | 0.85282 | 0.93764 | 0.98412 | 0.98707 | 0.99973 | 1.00000 | 1.00000 |
| $AP_{P_6}$                            | 0.27134         | 0.50660 | 0.72575 | 0.86381 | 0.94738 | 0.99361 | 0.99931 | 1.00000 | 1.00000 | 1.00000 |         |
| Gumbel(0,1)<br>(0.30624)              | $KS$            | 0.04769 | 0.08132 | 0.12981 | 0.16563 | 0.24229 | 0.41014 | 0.57580 | 0.85494 | 0.98672 | 0.99998 |
|                                       | $A^2$           | 0.02403 | 0.06354 | 0.09848 | 0.14001 | 0.22503 | 0.41334 | 0.61584 | 0.89571 | 0.99262 | 0.99999 |
|                                       | $W^2$           | 0.04601 | 0.08200 | 0.11328 | 0.14247 | 0.19106 | 0.29515 | 0.41646 | 0.66357 | 0.89178 | 0.99405 |
|                                       | $D_1$           | 0.21302 | 0.46670 | 0.73090 | 0.88605 | 0.96114 | 0.99575 | 0.99966 | 1.00000 | 1.00000 | 1.00000 |
|                                       | $D_2$           | 0.30396 | 0.54241 | 0.76131 | 0.88640 | 0.95844 | 0.99506 | 0.99962 | 1.00000 | 1.00000 | 1.00000 |
|                                       | $D_3$           | 0.30414 | 0.52433 | 0.71626 | 0.83766 | 0.91326 | 0.97661 | 0.99388 | 0.99968 | 1.00000 | 1.00000 |
|                                       | $D_4$           | 0.31441 | 0.52463 | 0.70840 | 0.83666 | 0.91470 | 0.97988 | 0.99606 | 0.99990 | 1.00000 | 1.00000 |
|                                       | $D_5$           | 0.22821 | 0.42042 | 0.74276 | 0.89622 | 0.96306 | 0.99547 | 0.99963 | 1.00000 | 1.00000 | 1.00000 |
|                                       | $D_6$           | 0.29510 | 0.53185 | 0.74152 | 0.87361 | 0.94637 | 0.99178 | 0.99915 | 1.00000 | 1.00000 | 1.00000 |
|                                       | $D_7$           | 0.28748 | 0.50617 | 0.70841 | 0.86090 | 0.93611 | 0.99325 | 0.99986 | 1.00000 | 1.00000 | 1.00000 |
|                                       | $D_{n,\lambda}$ | 0.00309 | 0.03682 | 0.13066 | 0.21543 | 0.41002 | 0.70669 | 0.87373 | 0.98927 | 0.99985 | 1.00000 |
|                                       | $Z_A$           | 0.03095 | 0.13316 | 0.32263 | 0.52064 | 0.73744 | 0.94495 | 0.99351 | 1.00000 | 1.00000 | 1.00000 |
|                                       | $Z_C$           | 0.01715 | 0.08460 | 0.22378 | 0.36540 | 0.58224 | 0.86689 | 0.97075 | 0.99976 | 1.00000 | 1.00000 |
|                                       | $Z_K$           | 0.02211 | 0.06494 | 0.13910 | 0.23327 | 0.40918 | 0.74625 | 0.92901 | 0.99874 | 1.00000 | 1.00000 |
|                                       | $M_{A^2}$       | 0.03527 | 0.13579 | 0.29035 | 0.46770 | 0.63075 | 0.86336 | 0.96050 | 0.99869 | 1.00000 | 1.00000 |
|                                       | $AP_{P_1}$      | 0.02092 | 0.03897 | 0.04742 | 0.03382 | 0.05008 | 0.05823 | 0.06916 | 0.09644 | 0.14210 | 0.21058 |
|                                       | $AP_{P_2}$      | 0.18120 | 0.18326 | 0.24785 | 0.28657 | 0.31051 | 0.42767 | 0.53071 | 0.68974 | 0.82943 | 0.95680 |
|                                       | $AP_{P_3}$      | 0.28708 | 0.48592 | 0.51730 | 0.54400 | 0.69827 | 0.79671 | 0.88850 | 0.97322 | 0.99557 | 0.99994 |
|                                       | $AP_{P_4}$      | 0.29389 | 0.52248 | 0.72348 | 0.84114 | 0.92480 | 0.94808 | 0.98139 | 0.99911 | 0.99997 | 1.00000 |
|                                       | $AP_{P_5}$      | 0.29419 | 0.52391 | 0.72703 | 0.84788 | 0.93351 | 0.97980 | 0.98200 | 0.99957 | 0.99998 | 1.00000 |
| $AP_{P_6}$                            | 0.29456         | 0.52709 | 0.73555 | 0.86047 | 0.94402 | 0.99209 | 0.99914 | 1.00000 | 1.00000 | 1.00000 |         |
| Gamma(2,1)<br>(0.31560)               | $KS$            | 0.08390 | 0.15794 | 0.27937 | 0.37331 | 0.54098 | 0.79274 | 0.92615 | 0.99665 | 1.00000 | 1.00000 |
|                                       | $A^2$           | 0.04369 | 0.11014 | 0.18490 | 0.26330 | 0.40266 | 0.65579 | 0.84398 | 0.98482 | 0.99989 | 1.00000 |
|                                       | $W^2$           | 0.07529 | 0.13231 | 0.20085 | 0.25617 | 0.34735 | 0.52453 | 0.68542 | 0.90114 | 0.99052 | 1.00000 |
|                                       | $D_1$           | 0.28370 | 0.60184 | 0.85046 | 0.95338 | 0.98722 | 0.99927 | 0.99997 | 1.00000 | 1.00000 | 1.00000 |
|                                       | $D_2$           | 0.32875 | 0.57990 | 0.79257 | 0.90544 | 0.96348 | 0.99544 | 0.99948 | 1.00000 | 1.00000 | 1.00000 |
|                                       | $D_3$           | 0.33004 | 0.53848 | 0.71604 | 0.83327 | 0.90711 | 0.97323 | 0.99251 | 0.99951 | 0.99998 | 1.00000 |
|                                       | $D_4$           | 0.31846 | 0.49909 | 0.66730 | 0.79941 | 0.88471 | 0.97019 | 0.99332 | 0.99976 | 1.00000 | 1.00000 |
|                                       | $D_5$           | 0.29857 | 0.56058 | 0.85060 | 0.94963 | 0.98316 | 0.99877 | 0.99992 | 1.00000 | 1.00000 | 1.00000 |
|                                       | $D_6$           | 0.33283 | 0.58377 | 0.77933 | 0.90830 | 0.96305 | 0.99618 | 0.99968 | 1.00000 | 1.00000 | 1.00000 |
|                                       | $D_7$           | 0.34232 | 0.65165 | 0.89252 | 0.97956 | 0.99695 | 0.99999 | 1.00000 | 1.00000 | 1.00000 | 1.00000 |
|                                       | $D_{n,\lambda}$ | 0.00293 | 0.06102 | 0.19007 | 0.30057 | 0.51293 | 0.80812 | 0.93670 | 0.99806 | 1.00000 | 1.00000 |
|                                       | $Z_A$           | 0.05799 | 0.23331 | 0.50367 | 0.72797 | 0.90091 | 0.99319 | 0.99976 | 1.00000 | 1.00000 | 1.00000 |
|                                       | $Z_C$           | 0.03243 | 0.14635 | 0.35064 | 0.53477 | 0.75953 | 0.95991 | 0.99604 | 1.00000 | 1.00000 | 1.00000 |
|                                       | $Z_K$           | 0.04574 | 0.15115 | 0.33042 | 0.52573 | 0.76905 | 0.97405 | 0.99861 | 1.00000 | 1.00000 | 1.00000 |
|                                       | $M_{A^2}$       | 0.05025 | 0.20084 | 0.41680 | 0.63326 | 0.79225 | 0.95595 | 0.99336 | 0.99996 | 1.00000 | 1.00000 |
|                                       | $AP_{P_1}$      | 0.02392 | 0.04432 | 0.05545 | 0.03946 | 0.05652 | 0.06886 | 0.07988 | 0.10986 | 0.16008 | 0.22917 |
|                                       | $AP_{P_2}$      | 0.20112 | 0.20384 | 0.27300 | 0.31754 | 0.34048 | 0.45804 | 0.55674 | 0.71301 | 0.84242 | 0.96119 |
|                                       | $AP_{P_3}$      | 0.31409 | 0.51070 | 0.54500 | 0.57089 | 0.71625 | 0.81208 | 0.89830 | 0.97517 | 0.99624 | 0.99996 |
|                                       | $AP_{P_4}$      | 0.32307 | 0.54980 | 0.74320 | 0.85391 | 0.92745 | 0.95052 | 0.98256 | 0.99920 | 0.99997 | 1.00000 |
|                                       | $AP_{P_5}$      | 0.32357 | 0.55146 | 0.74655 | 0.85992 | 0.93591 | 0.98092 | 0.98321 | 0.99955 | 0.99998 | 1.00000 |
| $AP_{P_6}$                            | 0.32512         | 0.55618 | 0.75476 | 0.87154 | 0.94709 | 0.99253 | 0.99915 | 1.00000 | 1.00000 | 1.00000 |         |

**Table 8.** The empirical power of tests for different alternatives (8/10)

| Distributions<br>( $R(\theta, P_5)$ ) | Statistics      | $n=10$  | $n=15$  | $n=20$  | $n=25$  | $n=30$  | $n=40$  | $n=50$  | $n=70$  | $n=100$ | $n=150$ |
|---------------------------------------|-----------------|---------|---------|---------|---------|---------|---------|---------|---------|---------|---------|
| Normal(0,1)<br>(0.33544)              | $KS$            | 0.03027 | 0.04786 | 0.06406 | 0.07897 | 0.10479 | 0.17028 | 0.24872 | 0.46569 | 0.77395 | 0.98187 |
|                                       | $A^2$           | 0.01519 | 0.04099 | 0.05879 | 0.08940 | 0.15468 | 0.31024 | 0.50933 | 0.82387 | 0.97975 | 0.99997 |
|                                       | $W^2$           | 0.03172 | 0.05590 | 0.06882 | 0.08825 | 0.11720 | 0.18418 | 0.27763 | 0.48932 | 0.76177 | 0.96965 |
|                                       | $D_1$           | 0.20317 | 0.45854 | 0.73646 | 0.90753 | 0.97599 | 0.99876 | 0.99999 | 1.00000 | 1.00000 | 1.00000 |
|                                       | $D_2$           | 0.33744 | 0.60215 | 0.80875 | 0.92110 | 0.97643 | 0.99848 | 0.99998 | 1.00000 | 1.00000 | 1.00000 |
|                                       | $D_3$           | 0.33996 | 0.61980 | 0.83988 | 0.94623 | 0.98651 | 0.99936 | 1.00000 | 1.00000 | 1.00000 | 1.00000 |
|                                       | $D_4$           | 0.36796 | 0.65627 | 0.87388 | 0.96537 | 0.99320 | 0.99990 | 1.00000 | 1.00000 | 1.00000 | 1.00000 |
|                                       | $D_5$           | 0.22068 | 0.40709 | 0.75595 | 0.92614 | 0.98321 | 0.99908 | 0.99999 | 1.00000 | 1.00000 | 1.00000 |
|                                       | $D_6$           | 0.32350 | 0.59765 | 0.82652 | 0.93721 | 0.98355 | 0.99898 | 0.99999 | 1.00000 | 1.00000 | 1.00000 |
|                                       | $D_7$           | 0.29737 | 0.47181 | 0.61134 | 0.75803 | 0.84523 | 0.96959 | 0.99846 | 1.00000 | 1.00000 | 1.00000 |
|                                       | $D_{n,\lambda}$ | 0.00272 | 0.02899 | 0.12881 | 0.22869 | 0.44832 | 0.75335 | 0.90258 | 0.99199 | 0.99994 | 1.00000 |
|                                       | $Z_A$           | 0.01950 | 0.09734 | 0.26836 | 0.46458 | 0.67866 | 0.91743 | 0.98770 | 0.99995 | 1.00000 | 1.00000 |
|                                       | $Z_C$           | 0.01167 | 0.06519 | 0.20002 | 0.34549 | 0.56036 | 0.85405 | 0.96574 | 0.99965 | 1.00000 | 1.00000 |
|                                       | $Z_K$           | 0.01186 | 0.02989 | 0.05848 | 0.09884 | 0.18599 | 0.43643 | 0.69398 | 0.96322 | 0.99975 | 1.00000 |
|                                       | $M_{A^2}$       | 0.03324 | 0.11583 | 0.24296 | 0.40089 | 0.55206 | 0.80409 | 0.93292 | 0.99604 | 0.99998 | 1.00000 |
|                                       | $AP_{P_1}$      | 0.02090 | 0.03844 | 0.04799 | 0.03278 | 0.04830 | 0.06029 | 0.07140 | 0.10257 | 0.15581 | 0.23816 |
|                                       | $AP_{P_2}$      | 0.19426 | 0.19703 | 0.27202 | 0.32564 | 0.35161 | 0.48799 | 0.60619 | 0.77467 | 0.90211 | 0.98580 |
|                                       | $AP_{P_3}$      | 0.31473 | 0.54888 | 0.58294 | 0.62580 | 0.78527 | 0.87689 | 0.95024 | 0.99332 | 0.99959 | 1.00000 |
|                                       | $AP_{P_4}$      | 0.32169 | 0.59887 | 0.81197 | 0.91547 | 0.97005 | 0.98419 | 0.99736 | 0.99996 | 1.00000 | 1.00000 |
|                                       | $AP_{P_5}$      | 0.32194 | 0.60047 | 0.81632 | 0.92152 | 0.97534 | 0.99631 | 0.99771 | 1.00000 | 1.00000 | 1.00000 |
| $AP_{P_6}$                            | 0.32357         | 0.60563 | 0.82781 | 0.93580 | 0.98432 | 0.99934 | 1.00000 | 1.00000 | 1.00000 | 1.00000 |         |
| Weibull(2,1)<br>(0.35577)             | $KS$            | 0.04335 | 0.07411 | 0.12208 | 0.16209 | 0.24101 | 0.43088 | 0.62328 | 0.90681 | 0.99668 | 1.00000 |
|                                       | $A^2$           | 0.02194 | 0.06195 | 0.10135 | 0.15411 | 0.25584 | 0.48685 | 0.70853 | 0.94444 | 0.99815 | 0.99999 |
|                                       | $W^2$           | 0.04413 | 0.07865 | 0.11053 | 0.14232 | 0.19331 | 0.31562 | 0.45716 | 0.72289 | 0.93098 | 0.99798 |
|                                       | $D_1$           | 0.25329 | 0.56784 | 0.84389 | 0.96301 | 0.99377 | 0.99988 | 1.00000 | 1.00000 | 1.00000 | 1.00000 |
|                                       | $D_2$           | 0.38039 | 0.67043 | 0.87399 | 0.96098 | 0.99096 | 0.99961 | 0.99998 | 1.00000 | 1.00000 | 1.00000 |
|                                       | $D_3$           | 0.38607 | 0.67246 | 0.86919 | 0.95722 | 0.98857 | 0.99937 | 1.00000 | 1.00000 | 1.00000 | 1.00000 |
|                                       | $D_4$           | 0.39991 | 0.67867 | 0.87059 | 0.95985 | 0.99025 | 0.99970 | 0.99999 | 1.00000 | 1.00000 | 1.00000 |
|                                       | $D_5$           | 0.27214 | 0.51628 | 0.85419 | 0.96847 | 0.99488 | 0.99992 | 1.00000 | 1.00000 | 1.00000 | 1.00000 |
|                                       | $D_6$           | 0.37216 | 0.67149 | 0.87909 | 0.96699 | 0.99345 | 0.99983 | 1.00000 | 1.00000 | 1.00000 | 1.00000 |
|                                       | $D_7$           | 0.35314 | 0.59922 | 0.79281 | 0.92622 | 0.97464 | 0.99933 | 1.00000 | 1.00000 | 1.00000 | 1.00000 |
|                                       | $D_{n,\lambda}$ | 0.00240 | 0.04525 | 0.18258 | 0.30970 | 0.55675 | 0.84556 | 0.95246 | 0.99833 | 1.00000 | 1.00000 |
|                                       | $Z_A$           | 0.03025 | 0.15429 | 0.39401 | 0.62587 | 0.83109 | 0.97986 | 0.99886 | 1.00000 | 1.00000 | 1.00000 |
|                                       | $Z_C$           | 0.01768 | 0.10323 | 0.29270 | 0.47936 | 0.71236 | 0.94369 | 0.99286 | 0.99997 | 1.00000 | 1.00000 |
|                                       | $Z_K$           | 0.01906 | 0.05998 | 0.13694 | 0.25026 | 0.44906 | 0.82100 | 0.96889 | 0.99988 | 1.00000 | 1.00000 |
|                                       | $M_{A^2}$       | 0.04503 | 0.17285 | 0.36125 | 0.56361 | 0.72816 | 0.92631 | 0.98486 | 0.99983 | 1.00000 | 1.00000 |
|                                       | $AP_{P_1}$      | 0.02413 | 0.04335 | 0.05318 | 0.03617 | 0.05529 | 0.06542 | 0.08148 | 0.11710 | 0.17605 | 0.26641 |
|                                       | $AP_{P_2}$      | 0.21648 | 0.22489 | 0.30695 | 0.36407 | 0.39528 | 0.54110 | 0.65685 | 0.81668 | 0.92804 | 0.99112 |
|                                       | $AP_{P_3}$      | 0.35450 | 0.59632 | 0.63093 | 0.67423 | 0.82664 | 0.90876 | 0.96395 | 0.99623 | 0.99980 | 1.00000 |
|                                       | $AP_{P_4}$      | 0.36486 | 0.65202 | 0.84848 | 0.93672 | 0.97849 | 0.99010 | 0.99820 | 0.99999 | 1.00000 | 1.00000 |
|                                       | $AP_{P_5}$      | 0.36529 | 0.65436 | 0.85248 | 0.94199 | 0.98282 | 0.99757 | 0.99841 | 1.00000 | 1.00000 | 1.00000 |
| $AP_{P_6}$                            | 0.36760         | 0.66136 | 0.86525 | 0.95364 | 0.99006 | 0.99957 | 0.99999 | 1.00000 | 1.00000 | 1.00000 |         |
| Kumaraswamy(2,5)<br>(0.38539)         | $KS$            | 0.03955 | 0.06525 | 0.10271 | 0.13355 | 0.19268 | 0.34930 | 0.51941 | 0.83843 | 0.98853 | 1.00000 |
|                                       | $A^2$           | 0.02025 | 0.05864 | 0.09985 | 0.15599 | 0.26884 | 0.51624 | 0.73823 | 0.95629 | 0.99872 | 1.00000 |
|                                       | $W^2$           | 0.04044 | 0.07404 | 0.10325 | 0.13777 | 0.18714 | 0.31505 | 0.46272 | 0.73499 | 0.93758 | 0.99832 |
|                                       | $D_1$           | 0.27663 | 0.61488 | 0.88903 | 0.98315 | 0.99831 | 1.00000 | 1.00000 | 1.00000 | 1.00000 | 1.00000 |
|                                       | $D_2$           | 0.43203 | 0.73711 | 0.91713 | 0.97950 | 0.99636 | 0.99994 | 1.00000 | 1.00000 | 1.00000 | 1.00000 |
|                                       | $D_3$           | 0.43992 | 0.76813 | 0.94589 | 0.99187 | 0.99923 | 1.00000 | 1.00000 | 1.00000 | 1.00000 | 1.00000 |
|                                       | $D_4$           | 0.46018 | 0.78316 | 0.95144 | 0.99352 | 0.99953 | 1.00000 | 1.00000 | 1.00000 | 1.00000 | 1.00000 |
|                                       | $D_5$           | 0.29808 | 0.55970 | 0.90046 | 0.98710 | 0.99893 | 1.00000 | 1.00000 | 1.00000 | 1.00000 | 1.00000 |
|                                       | $D_6$           | 0.42122 | 0.75091 | 0.94040 | 0.99025 | 0.99902 | 1.00000 | 1.00000 | 1.00000 | 1.00000 | 1.00000 |
|                                       | $D_7$           | 0.39212 | 0.63194 | 0.80579 | 0.92984 | 0.97496 | 0.99926 | 1.00000 | 1.00000 | 1.00000 | 1.00000 |
|                                       | $D_{n,\lambda}$ | 0.00209 | 0.04800 | 0.21836 | 0.37010 | 0.63794 | 0.89878 | 0.97561 | 0.99961 | 1.00000 | 1.00000 |
|                                       | $Z_A$           | 0.02937 | 0.16257 | 0.42749 | 0.66904 | 0.86264 | 0.98609 | 0.99945 | 1.00000 | 1.00000 | 1.00000 |
|                                       | $Z_C$           | 0.01866 | 0.11263 | 0.33150 | 0.53571 | 0.76697 | 0.96316 | 0.99650 | 0.99999 | 1.00000 | 1.00000 |
|                                       | $Z_K$           | 0.01734 | 0.04931 | 0.11317 | 0.20664 | 0.38340 | 0.76195 | 0.94888 | 0.99973 | 1.00000 | 1.00000 |
|                                       | $M_{A^2}$       | 0.04924 | 0.18351 | 0.38280 | 0.59092 | 0.75399 | 0.93952 | 0.98938 | 0.99992 | 1.00000 | 1.00000 |
|                                       | $AP_{P_1}$      | 0.02531 | 0.04520 | 0.05615 | 0.03749 | 0.05813 | 0.07226 | 0.08806 | 0.12680 | 0.19362 | 0.29909 |
|                                       | $AP_{P_2}$      | 0.23998 | 0.24865 | 0.33948 | 0.40607 | 0.44371 | 0.60396 | 0.72031 | 0.87146 | 0.95909 | 0.99701 |
|                                       | $AP_{P_3}$      | 0.39928 | 0.65739 | 0.69389 | 0.74634 | 0.88249 | 0.94719 | 0.98460 | 0.99904 | 0.99996 | 1.00000 |
|                                       | $AP_{P_4}$      | 0.41328 | 0.72395 | 0.90511 | 0.96705 | 0.99168 | 0.99715 | 0.99973 | 1.00000 | 1.00000 | 1.00000 |
|                                       | $AP_{P_5}$      | 0.41408 | 0.72745 | 0.90998 | 0.97121 | 0.99389 | 0.99948 | 0.99980 | 1.00000 | 1.00000 | 1.00000 |
| $AP_{P_6}$                            | 0.41637         | 0.73780 | 0.92320 | 0.98063 | 0.99721 | 0.99997 | 1.00000 | 1.00000 | 1.00000 | 1.00000 |         |



**Table 9.** The empirical power of tests for different alternatives (9/10)

| Distributions<br>( $R(\theta, P_5)$ ) | Statistics      | $n=10$  | $n=15$  | $n=20$  | $n=25$  | $n=30$  | $n=40$  | $n=50$  | $n=70$  | $n=100$ | $n=150$ |
|---------------------------------------|-----------------|---------|---------|---------|---------|---------|---------|---------|---------|---------|---------|
| Beta(2,1)<br>(0.43578)                | $KS$            | 0.09671 | 0.18938 | 0.34604 | 0.46489 | 0.66276 | 0.88953 | 0.97292 | 0.99958 | 1.00000 | 1.00000 |
|                                       | $A^2$           | 0.04882 | 0.13675 | 0.24777 | 0.36105 | 0.56409 | 0.82833 | 0.95190 | 0.99844 | 1.00000 | 1.00000 |
|                                       | $W^2$           | 0.08393 | 0.15374 | 0.24029 | 0.31250 | 0.44411 | 0.65950 | 0.82400 | 0.96904 | 0.99896 | 1.00000 |
|                                       | $D_1$           | 0.42469 | 0.81069 | 0.97437 | 0.99842 | 0.99996 | 1.00000 | 1.00000 | 1.00000 | 1.00000 | 1.00000 |
|                                       | $D_2$           | 0.51295 | 0.82851 | 0.96559 | 0.99516 | 0.99952 | 1.00000 | 1.00000 | 1.00000 | 1.00000 | 1.00000 |
|                                       | $D_3$           | 0.52510 | 0.83273 | 0.96842 | 0.99661 | 0.99968 | 1.00000 | 1.00000 | 1.00000 | 1.00000 | 1.00000 |
|                                       | $D_4$           | 0.50712 | 0.79647 | 0.94690 | 0.99121 | 0.99889 | 0.99999 | 1.00000 | 1.00000 | 1.00000 | 1.00000 |
|                                       | $D_5$           | 0.44279 | 0.77869 | 0.97434 | 0.99836 | 0.99997 | 1.00000 | 1.00000 | 1.00000 | 1.00000 | 1.00000 |
|                                       | $D_6$           | 0.52490 | 0.85462 | 0.97796 | 0.99858 | 0.99995 | 1.00000 | 1.00000 | 1.00000 | 1.00000 | 1.00000 |
|                                       | $D_7$           | 0.52002 | 0.84130 | 0.96630 | 0.99625 | 0.99967 | 1.00000 | 1.00000 | 1.00000 | 1.00000 | 1.00000 |
|                                       | $D_{n,\lambda}$ | 0.00257 | 0.11188 | 0.37395 | 0.55247 | 0.80561 | 0.96900 | 0.99661 | 0.99999 | 1.00000 | 1.00000 |
|                                       | $Z_A$           | 0.07567 | 0.35199 | 0.69675 | 0.88402 | 0.97650 | 0.99940 | 0.99999 | 1.00000 | 1.00000 | 1.00000 |
|                                       | $Z_C$           | 0.04751 | 0.25128 | 0.57124 | 0.77637 | 0.93475 | 0.99642 | 0.99991 | 1.00000 | 1.00000 | 1.00000 |
|                                       | $Z_K$           | 0.05436 | 0.18988 | 0.41539 | 0.63837 | 0.86323 | 0.99138 | 0.99976 | 1.00000 | 1.00000 | 1.00000 |
|                                       | $M_{A^2}$       | 0.08963 | 0.26915 | 0.50762 | 0.72716 | 0.87246 | 0.98453 | 0.99895 | 1.00000 | 1.00000 | 1.00000 |
|                                       | $AP_{P_1}$      | 0.03356 | 0.05845 | 0.07116 | 0.04758 | 0.07694 | 0.09394 | 0.11519 | 0.16592 | 0.24994 | 0.37963 |
|                                       | $AP_{P_2}$      | 0.29312 | 0.32050 | 0.41719 | 0.49540 | 0.53998 | 0.70012 | 0.80817 | 0.92757 | 0.98218 | 0.99940 |
|                                       | $AP_{P_3}$      | 0.48025 | 0.73627 | 0.77320 | 0.82149 | 0.92905 | 0.97370 | 0.99392 | 0.99978 | 1.00000 | 1.00000 |
|                                       | $AP_{P_4}$      | 0.50021 | 0.80207 | 0.94246 | 0.98209 | 0.99604 | 0.99900 | 0.99995 | 1.00000 | 1.00000 | 1.00000 |
|                                       | $AP_{P_5}$      | 0.50100 | 0.80560 | 0.94628 | 0.98480 | 0.99712 | 0.99977 | 0.99996 | 1.00000 | 1.00000 | 1.00000 |
| $AP_{P_6}$                            | 0.50612         | 0.81701 | 0.95685 | 0.99072 | 0.99918 | 0.99998 | 1.00000 | 1.00000 | 1.00000 | 1.00000 |         |
| Arcsine(-1,1)<br>(0.44510)            | $KS$            | 0.25408 | 0.46293 | 0.74150 | 0.85898 | 0.95906 | 0.99717 | 0.99981 | 1.00000 | 1.00000 | 1.00000 |
|                                       | $A^2$           | 0.14987 | 0.36938 | 0.67141 | 0.82083 | 0.94912 | 0.99576 | 0.99976 | 1.00000 | 1.00000 | 1.00000 |
|                                       | $W^2$           | 0.21744 | 0.36067 | 0.61045 | 0.73287 | 0.88244 | 0.97592 | 0.99596 | 0.99995 | 1.00000 | 1.00000 |
|                                       | $D_1$           | 0.77694 | 0.98255 | 0.99976 | 1.00000 | 1.00000 | 1.00000 | 1.00000 | 1.00000 | 1.00000 | 1.00000 |
|                                       | $D_2$           | 0.78932 | 0.97785 | 0.99885 | 0.99996 | 1.00000 | 1.00000 | 1.00000 | 1.00000 | 1.00000 | 1.00000 |
|                                       | $D_3$           | 0.81907 | 0.98514 | 0.99941 | 0.99998 | 1.00000 | 1.00000 | 1.00000 | 1.00000 | 1.00000 | 1.00000 |
|                                       | $D_4$           | 0.76451 | 0.96222 | 0.99634 | 0.99962 | 0.99999 | 1.00000 | 1.00000 | 1.00000 | 1.00000 | 1.00000 |
|                                       | $D_5$           | 0.77528 | 0.97947 | 0.99954 | 1.00000 | 1.00000 | 1.00000 | 1.00000 | 1.00000 | 1.00000 | 1.00000 |
|                                       | $D_6$           | 0.83006 | 0.99002 | 0.99980 | 1.00000 | 1.00000 | 1.00000 | 1.00000 | 1.00000 | 1.00000 | 1.00000 |
|                                       | $D_7$           | 0.82440 | 0.98690 | 0.99959 | 0.99999 | 1.00000 | 1.00000 | 1.00000 | 1.00000 | 1.00000 | 1.00000 |
|                                       | $D_{n,\lambda}$ | 0.01082 | 0.37540 | 0.82024 | 0.92570 | 0.98943 | 0.99980 | 0.99999 | 1.00000 | 1.00000 | 1.00000 |
|                                       | $Z_A$           | 0.26735 | 0.78002 | 0.96737 | 0.99583 | 0.99978 | 1.00000 | 1.00000 | 1.00000 | 1.00000 | 1.00000 |
|                                       | $Z_C$           | 0.20828 | 0.68908 | 0.93846 | 0.98664 | 0.99892 | 1.00000 | 1.00000 | 1.00000 | 1.00000 | 1.00000 |
|                                       | $Z_K$           | 0.17287 | 0.48309 | 0.81289 | 0.94367 | 0.99282 | 0.99996 | 0.99999 | 1.00000 | 1.00000 | 1.00000 |
|                                       | $M_{A^2}$       | 0.30307 | 0.71228 | 0.92415 | 0.98670 | 0.99805 | 0.99999 | 1.00000 | 1.00000 | 1.00000 | 1.00000 |
|                                       | $AP_{P_1}$      | 0.09776 | 0.15423 | 0.17697 | 0.12624 | 0.21645 | 0.26304 | 0.34456 | 0.48738 | 0.68052 | 0.87036 |
|                                       | $AP_{P_2}$      | 0.52232 | 0.64748 | 0.77093 | 0.85997 | 0.91112 | 0.97727 | 0.99421 | 0.99971 | 0.99999 | 1.00000 |
|                                       | $AP_{P_3}$      | 0.75437 | 0.93933 | 0.96958 | 0.98651 | 0.99817 | 0.99987 | 0.99998 | 1.00000 | 1.00000 | 1.00000 |
|                                       | $AP_{P_4}$      | 0.78284 | 0.96817 | 0.99685 | 0.99960 | 0.99997 | 1.00000 | 1.00000 | 1.00000 | 1.00000 | 1.00000 |
|                                       | $AP_{P_5}$      | 0.78496 | 0.96972 | 0.99722 | 0.99969 | 0.99999 | 1.00000 | 1.00000 | 1.00000 | 1.00000 | 1.00000 |
| $AP_{P_6}$                            | 0.79293         | 0.97516 | 0.99829 | 0.99985 | 1.00000 | 1.00000 | 1.00000 | 1.00000 | 1.00000 | 1.00000 |         |
| Uniform(0,1)<br>(0.52320)             | $KS$            | 0.08195 | 0.15420 | 0.28473 | 0.38704 | 0.57439 | 0.83288 | 0.95102 | 0.99843 | 1.00000 | 1.00000 |
|                                       | $A^2$           | 0.04466 | 0.13281 | 0.27594 | 0.41431 | 0.64113 | 0.88703 | 0.97587 | 0.99957 | 1.00000 | 1.00000 |
|                                       | $W^2$           | 0.07772 | 0.14308 | 0.24279 | 0.32408 | 0.47296 | 0.70597 | 0.86209 | 0.98161 | 0.99944 | 1.00000 |
|                                       | $D_1$           | 0.49638 | 0.87784 | 0.99170 | 0.99982 | 1.00000 | 1.00000 | 1.00000 | 1.00000 | 1.00000 | 1.00000 |
|                                       | $D_2$           | 0.63949 | 0.92156 | 0.99180 | 0.99935 | 0.99996 | 1.00000 | 1.00000 | 1.00000 | 1.00000 | 1.00000 |
|                                       | $D_3$           | 0.66351 | 0.94808 | 0.99748 | 0.99991 | 1.00000 | 1.00000 | 1.00000 | 1.00000 | 1.00000 | 1.00000 |
|                                       | $D_4$           | 0.65244 | 0.93373 | 0.99531 | 0.99991 | 0.99999 | 1.00000 | 1.00000 | 1.00000 | 1.00000 | 1.00000 |
|                                       | $D_5$           | 0.51596 | 0.85062 | 0.99138 | 0.99973 | 1.00000 | 1.00000 | 1.00000 | 1.00000 | 1.00000 | 1.00000 |
|                                       | $D_6$           | 0.65267 | 0.94286 | 0.99700 | 0.99990 | 1.00000 | 1.00000 | 1.00000 | 1.00000 | 1.00000 | 1.00000 |
|                                       | $D_7$           | 0.62496 | 0.89347 | 0.98149 | 0.99832 | 0.99986 | 1.00000 | 1.00000 | 1.00000 | 1.00000 | 1.00000 |
|                                       | $D_{n,\lambda}$ | 0.00219 | 0.13682 | 0.51199 | 0.70347 | 0.90804 | 0.99184 | 0.99938 | 1.00000 | 1.00000 | 1.00000 |
|                                       | $Z_A$           | 0.07501 | 0.41668 | 0.77755 | 0.93074 | 0.98874 | 0.99986 | 1.00000 | 1.00000 | 1.00000 | 1.00000 |
|                                       | $Z_C$           | 0.05268 | 0.32274 | 0.68810 | 0.86577 | 0.96944 | 0.99914 | 1.00000 | 1.00000 | 1.00000 | 1.00000 |
|                                       | $Z_K$           | 0.04224 | 0.15178 | 0.35849 | 0.58726 | 0.82722 | 0.98644 | 0.99949 | 1.00000 | 1.00000 | 1.00000 |
|                                       | $M_{A^2}$       | 0.11242 | 0.38447 | 0.67149 | 0.86501 | 0.95274 | 0.99655 | 0.99988 | 1.00000 | 1.00000 | 1.00000 |
|                                       | $AP_{P_1}$      | 0.04245 | 0.07230 | 0.08542 | 0.05578 | 0.09544 | 0.11560 | 0.15084 | 0.22190 | 0.33880 | 0.51502 |
|                                       | $AP_{P_2}$      | 0.35750 | 0.41550 | 0.53526 | 0.63236 | 0.69315 | 0.84718 | 0.92606 | 0.98455 | 0.99874 | 0.99999 |
|                                       | $AP_{P_3}$      | 0.58969 | 0.84166 | 0.88503 | 0.92491 | 0.98052 | 0.99596 | 0.99953 | 0.99999 | 1.00000 | 1.00000 |
|                                       | $AP_{P_4}$      | 0.61754 | 0.90101 | 0.98385 | 0.99658 | 0.99958 | 0.99998 | 1.00000 | 1.00000 | 1.00000 | 1.00000 |
|                                       | $AP_{P_5}$      | 0.61895 | 0.90457 | 0.98555 | 0.99720 | 0.99975 | 1.00000 | 1.00000 | 1.00000 | 1.00000 | 1.00000 |
| $AP_{P_6}$                            | 0.62547         | 0.91554 | 0.99020 | 0.99878 | 0.99992 | 1.00000 | 1.00000 | 1.00000 | 1.00000 | 1.00000 |         |

**Table 10.** The empirical power of tests for different alternatives (10/10)

| Distributions<br>( $R(\theta, P_5)$ ) | Statistics      | $n=10$  | $n=15$  | $n=20$  | $n=25$  | $n=30$  | $n=40$  | $n=50$  | $n=70$  | $n=100$ | $n=150$ |
|---------------------------------------|-----------------|---------|---------|---------|---------|---------|---------|---------|---------|---------|---------|
| Kumaraswamy(0.5,0.5)<br>(0.68950)     | $KS$            | 0.24314 | 0.44818 | 0.71798 | 0.84629 | 0.95198 | 0.99631 | 0.99977 | 1.00000 | 1.00000 | 1.00000 |
|                                       | $A^2$           | 0.13947 | 0.35171 | 0.64391 | 0.80235 | 0.93841 | 0.99459 | 0.99972 | 1.00000 | 1.00000 | 1.00000 |
|                                       | $W^2$           | 0.20626 | 0.34668 | 0.58468 | 0.71148 | 0.86600 | 0.96945 | 0.99519 | 0.99991 | 1.00000 | 1.00000 |
|                                       | $D_1$           | 0.76016 | 0.97995 | 0.99959 | 1.00000 | 1.00000 | 1.00000 | 1.00000 | 1.00000 | 1.00000 | 1.00000 |
|                                       | $D_2$           | 0.77161 | 0.97300 | 0.99814 | 0.99989 | 1.00000 | 1.00000 | 1.00000 | 1.00000 | 1.00000 | 1.00000 |
|                                       | $D_3$           | 0.80173 | 0.98044 | 0.99900 | 0.99998 | 1.00000 | 1.00000 | 1.00000 | 1.00000 | 1.00000 | 1.00000 |
|                                       | $D_4$           | 0.74543 | 0.95428 | 0.99392 | 0.99946 | 0.99995 | 1.00000 | 1.00000 | 1.00000 | 1.00000 | 1.00000 |
|                                       | $D_5$           | 0.76060 | 0.97560 | 0.99927 | 1.00000 | 1.00000 | 1.00000 | 1.00000 | 1.00000 | 1.00000 | 1.00000 |
|                                       | $D_6$           | 0.81338 | 0.98718 | 0.99960 | 1.00000 | 1.00000 | 1.00000 | 1.00000 | 1.00000 | 1.00000 | 1.00000 |
|                                       | $D_7$           | 0.80958 | 0.98434 | 0.99935 | 0.99999 | 1.00000 | 1.00000 | 1.00000 | 1.00000 | 1.00000 | 1.00000 |
|                                       | $D_{n,\lambda}$ | 0.01039 | 0.35443 | 0.79874 | 0.91363 | 0.98655 | 0.99976 | 1.00000 | 1.00000 | 1.00000 | 1.00000 |
|                                       | $Z_A$           | 0.25060 | 0.76048 | 0.96148 | 0.99482 | 0.99970 | 1.00000 | 1.00000 | 1.00000 | 1.00000 | 1.00000 |
|                                       | $Z_C$           | 0.19349 | 0.66625 | 0.92644 | 0.98416 | 0.99857 | 0.99999 | 1.00000 | 1.00000 | 1.00000 | 1.00000 |
|                                       | $Z_K$           | 0.16550 | 0.46742 | 0.79394 | 0.93719 | 0.99101 | 0.99989 | 1.00000 | 1.00000 | 1.00000 | 1.00000 |
|                                       | $M_{A^2}$       | 0.28821 | 0.68052 | 0.90535 | 0.98113 | 0.99706 | 1.00000 | 1.00000 | 1.00000 | 1.00000 | 1.00000 |
|                                       | $AP_{P_1}$      | 0.09066 | 0.14168 | 0.16248 | 0.11571 | 0.19528 | 0.23887 | 0.31147 | 0.44474 | 0.62998 | 0.82565 |
|                                       | $AP_{P_2}$      | 0.50476 | 0.62353 | 0.74472 | 0.83924 | 0.88996 | 0.96777 | 0.99081 | 0.99942 | 0.99999 | 1.00000 |
|                                       | $AP_{P_3}$      | 0.73584 | 0.93029 | 0.96131 | 0.98230 | 0.99700 | 0.99979 | 1.00000 | 1.00000 | 1.00000 | 1.00000 |
|                                       | $AP_{P_4}$      | 0.76470 | 0.96302 | 0.99551 | 0.99940 | 0.99994 | 0.99999 | 1.00000 | 1.00000 | 1.00000 | 1.00000 |
|                                       | $AP_{P_5}$      | 0.76684 | 0.96475 | 0.99605 | 0.99956 | 0.99998 | 1.00000 | 1.00000 | 1.00000 | 1.00000 | 1.00000 |
| $AP_{P_6}$                            | 0.77531         | 0.97058 | 0.99765 | 0.99982 | 0.99999 | 1.00000 | 1.00000 | 1.00000 | 1.00000 | 1.00000 |         |
| Beta(0.5,0.5)<br>(0.70883)            | $KS$            | 0.25270 | 0.46550 | 0.73910 | 0.85924 | 0.95884 | 0.99673 | 0.99977 | 1.00000 | 1.00000 | 1.00000 |
|                                       | $A^2$           | 0.14793 | 0.37316 | 0.67011 | 0.82216 | 0.94907 | 0.99586 | 0.99971 | 1.00000 | 1.00000 | 1.00000 |
|                                       | $W^2$           | 0.21441 | 0.36520 | 0.60922 | 0.73349 | 0.88124 | 0.97480 | 0.99625 | 0.99996 | 1.00000 | 1.00000 |
|                                       | $D_1$           | 0.77484 | 0.98294 | 0.99970 | 1.00000 | 1.00000 | 1.00000 | 1.00000 | 1.00000 | 1.00000 | 1.00000 |
|                                       | $D_2$           | 0.78747 | 0.97829 | 0.99888 | 0.99991 | 1.00000 | 1.00000 | 1.00000 | 1.00000 | 1.00000 | 1.00000 |
|                                       | $D_3$           | 0.81866 | 0.98495 | 0.99940 | 0.99998 | 1.00000 | 1.00000 | 1.00000 | 1.00000 | 1.00000 | 1.00000 |
|                                       | $D_4$           | 0.76313 | 0.96223 | 0.99587 | 0.99961 | 0.99999 | 1.00000 | 1.00000 | 1.00000 | 1.00000 | 1.00000 |
|                                       | $D_5$           | 0.77448 | 0.97938 | 0.99955 | 1.00000 | 1.00000 | 1.00000 | 1.00000 | 1.00000 | 1.00000 | 1.00000 |
|                                       | $D_6$           | 0.82870 | 0.98954 | 0.99974 | 1.00000 | 1.00000 | 1.00000 | 1.00000 | 1.00000 | 1.00000 | 1.00000 |
|                                       | $D_7$           | 0.82446 | 0.98685 | 0.99950 | 1.00000 | 1.00000 | 1.00000 | 1.00000 | 1.00000 | 1.00000 | 1.00000 |
|                                       | $D_{n,\lambda}$ | 0.01136 | 0.38003 | 0.82055 | 0.92632 | 0.98944 | 0.99984 | 1.00000 | 1.00000 | 1.00000 | 1.00000 |
|                                       | $Z_A$           | 0.26620 | 0.78432 | 0.96722 | 0.99552 | 0.99982 | 1.00000 | 1.00000 | 1.00000 | 1.00000 | 1.00000 |
|                                       | $Z_C$           | 0.20712 | 0.69538 | 0.93768 | 0.98654 | 0.99912 | 0.99999 | 1.00000 | 1.00000 | 1.00000 | 1.00000 |
|                                       | $Z_K$           | 0.17173 | 0.48622 | 0.81012 | 0.94450 | 0.99267 | 0.99993 | 1.00000 | 1.00000 | 1.00000 | 1.00000 |
|                                       | $M_{A^2}$       | 0.30274 | 0.71799 | 0.92411 | 0.98623 | 0.99807 | 1.00000 | 1.00000 | 1.00000 | 1.00000 | 1.00000 |
|                                       | $AP_{P_1}$      | 0.09774 | 0.15426 | 0.17528 | 0.12710 | 0.21350 | 0.26293 | 0.34197 | 0.48648 | 0.68066 | 0.87041 |
|                                       | $AP_{P_2}$      | 0.52127 | 0.65128 | 0.77136 | 0.86095 | 0.91168 | 0.97635 | 0.99414 | 0.99966 | 1.00000 | 1.00000 |
|                                       | $AP_{P_3}$      | 0.75300 | 0.93993 | 0.96892 | 0.98568 | 0.99802 | 0.99987 | 1.00000 | 1.00000 | 1.00000 | 1.00000 |
|                                       | $AP_{P_4}$      | 0.78098 | 0.96889 | 0.99681 | 0.99951 | 0.99997 | 1.00000 | 1.00000 | 1.00000 | 1.00000 | 1.00000 |
|                                       | $AP_{P_5}$      | 0.78295 | 0.97037 | 0.99723 | 0.99962 | 0.99997 | 1.00000 | 1.00000 | 1.00000 | 1.00000 | 1.00000 |
| $AP_{P_6}$                            | 0.79116         | 0.97553 | 0.99829 | 0.99979 | 1.00000 | 1.00000 | 1.00000 | 1.00000 | 1.00000 | 1.00000 |         |
| Beta(0.1,0.1)<br>(0.99831)            | $KS$            | 0.83676 | 0.99368 | 0.99997 | 100.000 | 100.000 | 100.000 | 1.00000 | 1.00000 | 1.00000 | 1.00000 |
|                                       | $A^2$           | 0.85231 | 0.98958 | 0.99984 | 1.00000 | 1.00000 | 1.00000 | 1.00000 | 1.00000 | 1.00000 | 1.00000 |
|                                       | $W^2$           | 0.89806 | 0.98638 | 0.99975 | 0.99999 | 1.00000 | 1.00000 | 1.00000 | 1.00000 | 1.00000 | 1.00000 |
|                                       | $D_1$           | 0.99847 | 1.00000 | 1.00000 | 1.00000 | 1.00000 | 1.00000 | 1.00000 | 1.00000 | 1.00000 | 1.00000 |
|                                       | $D_2$           | 0.86548 | 0.96340 | 0.98801 | 0.99580 | 0.99917 | 0.99993 | 0.99996 | 1.00000 | 1.00000 | 1.00000 |
|                                       | $D_3$           | 0.88341 | 0.97235 | 0.99291 | 0.99811 | 0.99975 | 0.99998 | 1.00000 | 1.00000 | 1.00000 | 1.00000 |
|                                       | $D_4$           | 0.81909 | 0.93445 | 0.97773 | 0.99254 | 0.99815 | 0.99985 | 0.99996 | 1.00000 | 1.00000 | 1.00000 |
|                                       | $D_5$           | 0.99762 | 1.00000 | 1.00000 | 1.00000 | 1.00000 | 1.00000 | 1.00000 | 1.00000 | 1.00000 | 1.00000 |
|                                       | $D_6$           | 0.92776 | 0.99141 | 0.99827 | 0.99967 | 0.99997 | 1.00000 | 1.00000 | 1.00000 | 1.00000 | 1.00000 |
|                                       | $D_7$           | 0.90102 | 0.97976 | 0.99583 | 0.99869 | 0.99984 | 0.99998 | 1.00000 | 1.00000 | 1.00000 | 1.00000 |
|                                       | $D_{n,\lambda}$ | 0.29191 | 0.97235 | 0.99917 | 0.99980 | 1.00000 | 1.00000 | 1.00000 | 1.00000 | 1.00000 | 1.00000 |
|                                       | $Z_A$           | 0.95908 | 0.99960 | 1.00000 | 1.00000 | 1.00000 | 1.00000 | 1.00000 | 1.00000 | 1.00000 | 1.00000 |
|                                       | $Z_C$           | 0.93781 | 0.99873 | 0.99999 | 1.00000 | 1.00000 | 1.00000 | 1.00000 | 1.00000 | 1.00000 | 1.00000 |
|                                       | $Z_K$           | 0.75519 | 0.99462 | 0.99999 | 1.00000 | 1.00000 | 1.00000 | 1.00000 | 1.00000 | 1.00000 | 1.00000 |
|                                       | $M_{A^2}$       | 0.94524 | 0.99935 | 0.99999 | 1.00000 | 1.00000 | 1.00000 | 1.00000 | 1.00000 | 1.00000 | 1.00000 |
|                                       | $AP_{P_1}$      | 0.50027 | 0.70764 | 0.81049 | 0.84559 | 0.91433 | 0.96052 | 0.98385 | 0.99716 | 0.99991 | 1.00000 |
|                                       | $AP_{P_2}$      | 0.80869 | 0.89792 | 0.95335 | 0.97933 | 0.99097 | 0.99797 | 0.99956 | 0.99997 | 1.00000 | 1.00000 |
|                                       | $AP_{P_3}$      | 0.86854 | 0.95915 | 0.98013 | 0.99136 | 0.99778 | 0.99965 | 0.99992 | 1.00000 | 1.00000 | 1.00000 |
|                                       | $AP_{P_4}$      | 0.87877 | 0.96805 | 0.98966 | 0.99623 | 0.99930 | 0.99992 | 0.99996 | 1.00000 | 1.00000 | 1.00000 |
|                                       | $AP_{P_5}$      | 0.87956 | 0.96872 | 0.99006 | 0.99642 | 0.99939 | 0.99995 | 0.99996 | 1.00000 | 1.00000 | 1.00000 |
| $AP_{P_6}$                            | 0.88306         | 0.97111 | 0.99172 | 0.99708 | 0.99954 | 0.99998 | 0.99998 | 1.00000 | 1.00000 | 1.00000 |         |

**Table 11.** Empirical type-I error rates for the tests at significance level  $\alpha = 0.05$

| Distributions    | Statistics      | $n=10$  | $n=15$  | $n=20$  | $n=25$  | $n=30$  | $n=40$  | $n=50$  | $n=70$  | $n=100$ | $n=150$ |
|------------------|-----------------|---------|---------|---------|---------|---------|---------|---------|---------|---------|---------|
| Cauchy(0,0.5)    | $KS$            | 0.04919 | 0.04939 | 0.05046 | 0.05121 | 0.04927 | 0.05135 | 0.04979 | 0.05111 | 0.05097 | 0.04918 |
|                  | $A^2$           | 0.05004 | 0.05029 | 0.05027 | 0.05016 | 0.05072 | 0.05030 | 0.04952 | 0.05142 | 0.04944 | 0.05074 |
|                  | $W^2$           | 0.04949 | 0.05038 | 0.05003 | 0.05080 | 0.05010 | 0.05013 | 0.04998 | 0.05067 | 0.05005 | 0.05060 |
|                  | $D_1$           | 0.05030 | 0.04864 | 0.05095 | 0.05072 | 0.05149 | 0.04891 | 0.04936 | 0.05105 | 0.05073 | 0.04784 |
|                  | $D_2$           | 0.05107 | 0.04879 | 0.05108 | 0.04986 | 0.05086 | 0.04890 | 0.05053 | 0.05122 | 0.05098 | 0.04923 |
|                  | $D_3$           | 0.05141 | 0.04952 | 0.05112 | 0.05079 | 0.05071 | 0.04816 | 0.04951 | 0.05130 | 0.05100 | 0.04707 |
|                  | $D_4$           | 0.05165 | 0.04920 | 0.05048 | 0.05050 | 0.05057 | 0.04851 | 0.04961 | 0.05151 | 0.05076 | 0.04799 |
|                  | $D_5$           | 0.05032 | 0.04984 | 0.05049 | 0.05084 | 0.05115 | 0.04863 | 0.04975 | 0.05092 | 0.05079 | 0.04785 |
|                  | $D_6$           | 0.05143 | 0.04951 | 0.05034 | 0.05135 | 0.05107 | 0.04850 | 0.04954 | 0.05130 | 0.05070 | 0.04778 |
|                  | $D_7$           | 0.05131 | 0.04862 | 0.05090 | 0.05089 | 0.04981 | 0.04754 | 0.05034 | 0.05010 | 0.05043 | 0.04943 |
|                  | $D_{n,\lambda}$ | 0.05037 | 0.05050 | 0.05045 | 0.05063 | 0.04885 | 0.05104 | 0.04927 | 0.05155 | 0.04898 | 0.05017 |
|                  | $Z_A$           | 0.04966 | 0.04978 | 0.05107 | 0.04985 | 0.05017 | 0.05065 | 0.04979 | 0.04937 | 0.04950 | 0.04996 |
|                  | $Z_C$           | 0.04989 | 0.04828 | 0.05149 | 0.04848 | 0.04905 | 0.05060 | 0.04967 | 0.05163 | 0.04916 | 0.05059 |
|                  | $Z_K$           | 0.04970 | 0.04984 | 0.05152 | 0.05025 | 0.04887 | 0.05198 | 0.05000 | 0.05214 | 0.04968 | 0.05000 |
|                  | $M_{A^2}$       | 0.04983 | 0.05004 | 0.04947 | 0.05043 | 0.04807 | 0.04991 | 0.04894 | 0.04982 | 0.04871 | 0.04902 |
|                  | $AP_{P_1}$      | 0.04977 | 0.04971 | 0.05098 | 0.04949 | 0.04873 | 0.04990 | 0.05096 | 0.04830 | 0.04991 | 0.05169 |
|                  | $AP_{P_2}$      | 0.05002 | 0.04852 | 0.05175 | 0.05088 | 0.04999 | 0.05053 | 0.05120 | 0.05301 | 0.04972 | 0.05259 |
|                  | $AP_{P_3}$      | 0.05072 | 0.04797 | 0.05137 | 0.05117 | 0.04983 | 0.05150 | 0.04990 | 0.04992 | 0.05007 | 0.04890 |
|                  | $AP_{P_4}$      | 0.05127 | 0.04852 | 0.05074 | 0.05108 | 0.05022 | 0.04912 | 0.05074 | 0.05011 | 0.05106 | 0.05012 |
|                  | $AP_{P_5}$      | 0.05124 | 0.04824 | 0.05054 | 0.05088 | 0.05033 | 0.04823 | 0.05079 | 0.05009 | 0.05104 | 0.05001 |
| $AP_{P_6}$       | 0.05130         | 0.04832 | 0.05065 | 0.05085 | 0.05140 | 0.04884 | 0.04961 | 0.05140 | 0.05056 | 0.04961 |         |
| Cauchy(0,1)      | $KS$            | 0.04966 | 0.05046 | 0.05061 | 0.05016 | 0.04907 | 0.05062 | 0.04974 | 0.05111 | 0.04961 | 0.05064 |
|                  | $A^2$           | 0.05003 | 0.05095 | 0.05030 | 0.04870 | 0.04967 | 0.04809 | 0.05107 | 0.05255 | 0.04774 | 0.05164 |
|                  | $W^2$           | 0.04963 | 0.05080 | 0.05063 | 0.05016 | 0.04886 | 0.04927 | 0.05096 | 0.05185 | 0.04770 | 0.05075 |
|                  | $D_1$           | 0.04985 | 0.04923 | 0.05093 | 0.05076 | 0.05169 | 0.05013 | 0.04903 | 0.05102 | 0.04982 | 0.05045 |
|                  | $D_2$           | 0.05072 | 0.04946 | 0.05135 | 0.04970 | 0.05061 | 0.04985 | 0.04986 | 0.05057 | 0.05096 | 0.05118 |
|                  | $D_3$           | 0.05169 | 0.05011 | 0.05091 | 0.05021 | 0.05115 | 0.04948 | 0.04942 | 0.05002 | 0.05013 | 0.04982 |
|                  | $D_4$           | 0.05086 | 0.04954 | 0.05049 | 0.05054 | 0.05064 | 0.04955 | 0.04934 | 0.05017 | 0.05042 | 0.05062 |
|                  | $D_5$           | 0.04971 | 0.04978 | 0.05099 | 0.05083 | 0.05152 | 0.04947 | 0.04922 | 0.05073 | 0.04994 | 0.05047 |
|                  | $D_6$           | 0.05095 | 0.04968 | 0.05092 | 0.05064 | 0.05109 | 0.04955 | 0.04924 | 0.05057 | 0.04980 | 0.05040 |
|                  | $D_7$           | 0.05144 | 0.04887 | 0.05106 | 0.05163 | 0.04942 | 0.04956 | 0.05015 | 0.05119 | 0.04977 | 0.05110 |
|                  | $D_{n,\lambda}$ | 0.04952 | 0.04992 | 0.05049 | 0.04976 | 0.04919 | 0.05103 | 0.05044 | 0.05176 | 0.04825 | 0.05118 |
|                  | $Z_A$           | 0.05006 | 0.05074 | 0.05207 | 0.04926 | 0.04899 | 0.04893 | 0.05001 | 0.05070 | 0.04910 | 0.05111 |
|                  | $Z_C$           | 0.05043 | 0.05035 | 0.05248 | 0.04850 | 0.04859 | 0.04907 | 0.04951 | 0.05201 | 0.04847 | 0.05086 |
|                  | $Z_K$           | 0.04938 | 0.05034 | 0.05064 | 0.04910 | 0.04827 | 0.04902 | 0.04985 | 0.05199 | 0.04929 | 0.05118 |
|                  | $M_{A^2}$       | 0.05131 | 0.05144 | 0.04993 | 0.04935 | 0.04748 | 0.04949 | 0.04926 | 0.05118 | 0.04782 | 0.04919 |
|                  | $AP_{P_1}$      | 0.04978 | 0.05003 | 0.05173 | 0.04963 | 0.04896 | 0.04971 | 0.05085 | 0.04953 | 0.04889 | 0.05147 |
|                  | $AP_{P_2}$      | 0.04997 | 0.04894 | 0.04998 | 0.04939 | 0.05045 | 0.04985 | 0.05163 | 0.05266 | 0.04986 | 0.05338 |
|                  | $AP_{P_3}$      | 0.05004 | 0.04879 | 0.05126 | 0.05026 | 0.04892 | 0.04980 | 0.05131 | 0.05025 | 0.05116 | 0.04933 |
|                  | $AP_{P_4}$      | 0.05115 | 0.04968 | 0.05042 | 0.04940 | 0.05046 | 0.04927 | 0.05142 | 0.05069 | 0.04949 | 0.05073 |
|                  | $AP_{P_5}$      | 0.05111 | 0.04956 | 0.05020 | 0.04949 | 0.05050 | 0.04921 | 0.05124 | 0.05098 | 0.04933 | 0.05028 |
| $AP_{P_6}$       | 0.05113         | 0.04985 | 0.05034 | 0.04982 | 0.05142 | 0.04971 | 0.04985 | 0.05060 | 0.05077 | 0.05043 |         |
| Cauchy(100,1000) | $KS$            | 0.04881 | 0.04928 | 0.05076 | 0.04973 | 0.04861 | 0.04925 | 0.04934 | 0.05138 | 0.05042 | 0.05036 |
|                  | $A^2$           | 0.04858 | 0.05030 | 0.05014 | 0.04859 | 0.04872 | 0.04868 | 0.04957 | 0.05220 | 0.04814 | 0.05101 |
|                  | $W^2$           | 0.04942 | 0.05043 | 0.05126 | 0.04957 | 0.04907 | 0.04835 | 0.05093 | 0.05099 | 0.04930 | 0.05076 |
|                  | $D_1$           | 0.04932 | 0.04909 | 0.05146 | 0.04837 | 0.05111 | 0.04991 | 0.04821 | 0.04983 | 0.05100 | 0.05003 |
|                  | $D_2$           | 0.04955 | 0.04906 | 0.05020 | 0.04803 | 0.05056 | 0.04881 | 0.04975 | 0.04965 | 0.05098 | 0.05095 |
|                  | $D_3$           | 0.04990 | 0.04946 | 0.05115 | 0.04841 | 0.05076 | 0.04991 | 0.04865 | 0.04935 | 0.05105 | 0.04887 |
|                  | $D_4$           | 0.05040 | 0.04877 | 0.05025 | 0.04918 | 0.05016 | 0.04902 | 0.04845 | 0.04928 | 0.05088 | 0.04986 |
|                  | $D_5$           | 0.04928 | 0.04961 | 0.05117 | 0.04877 | 0.05036 | 0.04947 | 0.04850 | 0.04932 | 0.05104 | 0.05010 |
|                  | $D_6$           | 0.04947 | 0.04936 | 0.05100 | 0.04822 | 0.05082 | 0.04967 | 0.04823 | 0.04944 | 0.05106 | 0.04987 |
|                  | $D_7$           | 0.04992 | 0.04916 | 0.05103 | 0.04948 | 0.04916 | 0.04761 | 0.05054 | 0.05041 | 0.05010 | 0.05068 |
|                  | $D_{n,\lambda}$ | 0.05129 | 0.05078 | 0.05018 | 0.05037 | 0.04883 | 0.05099 | 0.05021 | 0.05137 | 0.04867 | 0.05028 |
|                  | $Z_A$           | 0.04870 | 0.05055 | 0.05046 | 0.04904 | 0.04917 | 0.04952 | 0.04969 | 0.05037 | 0.04945 | 0.05027 |
|                  | $Z_C$           | 0.04966 | 0.05062 | 0.04978 | 0.04920 | 0.04864 | 0.05042 | 0.04926 | 0.05217 | 0.04872 | 0.05004 |
|                  | $Z_K$           | 0.04936 | 0.05075 | 0.04996 | 0.04786 | 0.04837 | 0.04863 | 0.04983 | 0.05122 | 0.04950 | 0.05076 |
|                  | $M_{A^2}$       | 0.05224 | 0.05205 | 0.05154 | 0.05192 | 0.05133 | 0.05366 | 0.05291 | 0.05532 | 0.05152 | 0.05361 |
|                  | $AP_{P_1}$      | 0.05074 | 0.05049 | 0.04992 | 0.04993 | 0.04997 | 0.05128 | 0.05124 | 0.04999 | 0.04887 | 0.05080 |
|                  | $AP_{P_2}$      | 0.04859 | 0.04975 | 0.05103 | 0.04954 | 0.04991 | 0.05040 | 0.05146 | 0.05207 | 0.04957 | 0.05292 |
|                  | $AP_{P_3}$      | 0.04919 | 0.04751 | 0.04993 | 0.04936 | 0.04795 | 0.05024 | 0.05057 | 0.05100 | 0.05062 | 0.04967 |
|                  | $AP_{P_4}$      | 0.04980 | 0.04839 | 0.05015 | 0.04996 | 0.04975 | 0.04994 | 0.05056 | 0.05147 | 0.05004 | 0.05201 |
|                  | $AP_{P_5}$      | 0.04971 | 0.04842 | 0.05015 | 0.04972 | 0.04966 | 0.04938 | 0.05053 | 0.05185 | 0.05044 | 0.05057 |
| $AP_{P_6}$       | 0.04959         | 0.04860 | 0.04990 | 0.04981 | 0.05072 | 0.04922 | 0.04910 | 0.04940 | 0.05213 | 0.05002 |         |

**Table 12.** Some critical values for the tests at significance level  $\alpha = 0.01$

| Statistics      | $n=10$                 | $n=15$                 | $n=20$                 | $n=25$                 | $n=30$                 |
|-----------------|------------------------|------------------------|------------------------|------------------------|------------------------|
| $K_S$           | 0.3407876              | 0.2834410              | 0.2410219              | 0.2198424              | 0.1981575              |
| $A^2$           | 1.3206730              | 1.4520748              | 1.4232397              | 1.5025399              | 1.4880573              |
| $W^2$           | 0.2136227              | 0.2321362              | 0.2181642              | 0.2285257              | 0.2187129              |
| $D_1$           | 2.5940077              | 1.9309591              | 1.6673596              | 1.5328244              | 1.4275424              |
| $D_2$           | 1.3869066              | 1.3024448              | 1.2429148              | 1.2096797              | 1.1755909              |
| $D_3$           | 1.5541804              | 1.3643845              | 1.1996352              | 1.0766993              | 0.9653735              |
| $D_4$           | 0.9056100              | 0.8800025              | 0.8302720              | 0.7966267              | 0.7522291              |
| $D_5$           | 2.1606305              | 1.7015219              | 1.4506368              | 1.3538181              | 1.2686081              |
| $D_6$           | 1.5171558              | 1.4053085              | 1.2875374              | 1.1994779              | 1.1028997              |
| $D_7$           | 1.2743655              | 1.1302016              | 0.9885028              | 0.9375883              | 0.8495283              |
| $D_{n,\lambda}$ | 0.2371098              | 0.2252610              | 0.2223694              | 0.2528951              | 0.2369049              |
| $Z_A$           | 4.0296380              | 3.9039828              | 3.7896877              | 3.7256541              | 3.6729518              |
| $Z_C$           | 22.3149277             | 24.1429868             | 25.7169292             | 27.0891480             | 27.7420413             |
| $Z_K$           | 2.9318539              | 3.3765832              | 3.6685789              | 4.0542591              | 4.1678916              |
| $M_{A^2}$       | 0.9565752              | 0.9132426              | 0.8970988              | 0.9045584              | 0.8957828              |
| $AP_{p_1}$      | (0.2676371, 0.9635554) | (0.4396927, 0.9661394) | (0.4405277, 0.9649135) | (0.3878955, 0.9696322) | (0.4254182, 0.9448144) |
| $AP_{p_2}$      | (0.0001606, 0.7616981) | (0.0361527, 0.7367930) | (0.0651408, 0.6983990) | (0.0806475, 0.6822559) | (0.0955988, 0.6461435) |
| $AP_{p_3}$      | (0.0000008, 0.6486071) | (0.0000026, 0.5359443) | (0.0001271, 0.5134628) | (0.0103181, 0.4918005) | (0.0134710, 0.4425474) |
| $AP_{p_4}$      | (0.0000005, 0.6167203) | (0.0000012, 0.4788643) | (0.0000030, 0.4007753) | (0.0000083, 0.3514809) | (0.0000097, 0.3130504) |
| $AP_{p_5}$      | (0.0000005, 0.6136474) | (0.0000011, 0.4745071) | (0.0000028, 0.3939127) | (0.0000000, 0.3424151) | (0.0000075, 0.3017983) |
| $AP_{p_6}$      | (0.0000005, 0.6007800) | (0.0000009, 0.4551876) | (0.0000020, 0.3689400) | (0.0000000, 0.3138656) | (0.0000037, 0.2682250) |
| Statistics      | $n=40$                 | $n=50$                 | $n=70$                 | $n=100$                | $n=150$                |
| $K_S$           | 0.1706687              | 0.1534843              | 0.1285502              | 0.1077105              | 0.0873178              |
| $A^2$           | 1.4940290              | 1.5181176              | 1.5041760              | 1.5255240              | 1.5452288              |
| $W^2$           | 0.2186018              | 0.2217249              | 0.2153594              | 0.2159970              | 0.2162106              |
| $D_1$           | 1.2850854              | 1.1561406              | 0.9571366              | 0.7456861              | 0.5562050              |
| $D_2$           | 1.1355900              | 1.1053886              | 1.0658122              | 1.0290224              | 0.9901282              |
| $D_3$           | 0.8118997              | 0.6961354              | 0.5474452              | 0.4135649              | 0.2972848              |
| $D_4$           | 0.6898895              | 0.6360959              | 0.5571312              | 0.4724448              | 0.3839779              |
| $D_5$           | 1.0978592              | 0.9549380              | 0.7556197              | 0.5608240              | 0.3954632              |
| $D_6$           | 0.9681570              | 0.8585869              | 0.7062477              | 0.5552997              | 0.4156109              |
| $D_7$           | 0.7573927              | 0.6945298              | 0.6176578              | 0.5632799              | 0.5252970              |
| $D_{n,\lambda}$ | 0.2339123              | 0.2364998              | 0.2344412              | 0.2314429              | 0.2319071              |
| $Z_A$           | 3.5985612              | 3.5529792              | 3.4903181              | 3.4394056              | 3.3968925              |
| $Z_C$           | 29.0429267             | 30.1973253             | 31.3533108             | 32.9628521             | 34.3295420             |
| $Z_K$           | 4.4461338              | 4.6372453              | 4.8514298              | 5.1189581              | 5.3807129              |
| $M_{A^2}$       | 0.8906348              | 0.8947952              | 0.8876523              | 0.8729203              | 0.8775017              |
| $AP_{p_1}$      | (0.4675004, 0.9367286) | (0.4846873, 0.9253623) | (0.5183908, 0.9069657) | (0.5513096, 0.8850304) | (0.5797999, 0.8603562) |
| $AP_{p_2}$      | (0.1155923, 0.6061690) | (0.1350043, 0.5787444) | (0.1599830, 0.5378337) | (0.1862195, 0.5046017) | (0.2063085, 0.4674825) |
| $AP_{p_3}$      | (0.0252570, 0.4083524) | (0.0352286, 0.3737034) | (0.0478063, 0.3352664) | (0.0606246, 0.3027989) | (0.0753809, 0.2717240) |
| $AP_{p_4}$      | (0.0000058, 0.2942731) | (0.0036282, 0.2678096) | (0.0084458, 0.2215394) | (0.0160773, 0.1962725) | (0.0244157, 0.1710126) |
| $AP_{p_5}$      | (0.0000011, 0.2641947) | (0.0016900, 0.2605569) | (0.0059178, 0.2099716) | (0.0128440, 0.1870868) | (0.0173436, 0.1583258) |
| $AP_{p_6}$      | (0.0000002, 0.2151284) | (0.0000000, 0.1806885) | (0.0000044, 0.1421206) | (0.0004626, 0.1295133) | (0.0021534, 0.1006283) |

**Table 13.** Some critical values for the tests at significance level  $\alpha = 0.1$

| Statistics      | $n=10$                 | $n=15$                 | $n=20$                  | $n=25$                 | $n=30$                 |
|-----------------|------------------------|------------------------|-------------------------|------------------------|------------------------|
| $K_S$           | 0.2369831              | 0.2076034              | 0.1759463               | 0.1648761              | 0.1476084              |
| $A^2$           | 0.7502831              | 0.8207915              | 0.8023881               | 0.8704474              | 0.8350348              |
| $W^2$           | 0.0989124              | 0.1147367              | 0.1061003               | 0.1167149              | 0.1096662              |
| $D_1$           | 1.8920900              | 1.5475608              | 1.3710287               | 1.2521839              | 1.1467493              |
| $D_2$           | 1.2136261              | 1.1535281              | 1.1124876               | 1.0863404              | 1.0616761              |
| $D_3$           | 1.2064496              | 1.0085285              | 0.8580286               | 0.7429437              | 0.6550076              |
| $D_4$           | 0.7984774              | 0.7478201              | 0.6835564               | 0.6392879              | 0.5914923              |
| $D_5$           | 1.5933073              | 1.3488726              | 1.1731899               | 1.0482852              | 0.9240280              |
| $D_6$           | 1.2746812              | 1.1422667              | 1.0095802               | 0.9153342              | 0.8229973              |
| $D_7$           | 1.0343351              | 0.9326059              | 0.8000497               | 0.7666427              | 0.6835241              |
| $D_{n,\lambda}$ | 0.1196807              | 0.1220810              | 0.1225906               | 0.1344187              | 0.1289610              |
| $Z_A$           | 3.6427705              | 3.5890249              | 3.5415754               | 3.5138807              | 3.4842675              |
| $Z_C$           | 10.0498921             | 11.9331396             | 13.0247958              | 14.1438891             | 14.5994169             |
| $Z_K$           | 1.5020106              | 1.8255242              | 2.0226602               | 2.2686003              | 2.3376512              |
| $MA^2$          | 0.4992522              | 0.5087223              | 0.5143525               | 0.5196568              | 0.5199903              |
| $AP_{p_1}$      | (0.5162361, 0.9192776) | (0.5723219, 0.9088315) | (0.5625551, 0.9229915)  | (0.5396396, 0.9326593) | (0.5674036, 0.9039714) |
| $AP_{p_2}$      | (0.0692220, 0.6524682) | (0.1196531, 0.6109426) | (0.1404696, 0.5771669)  | (0.1460574, 0.5512440) | (0.1646527, 0.5325194) |
| $AP_{p_3}$      | (0.0000161, 0.4539356) | (0.0001005, 0.3681149) | (0.0257455, 0.3737043)  | (0.0389896, 0.3585117) | (0.0449273, 0.3276298) |
| $AP_{p_4}$      | (0.0000115, 0.4117568) | (0.0000006, 0.3068039) | (0.0000015, 0.2506364)  | (0.0000050, 0.2174633) | (0.0000777, 0.1991696) |
| $AP_{p_5}$      | (0.0000111, 0.4075247) | (0.0000006, 0.3016334) | (0.0000171, 0.2443101)  | (0.0000043, 0.2096486) | (0.0000025, 0.1887378) |
| $AP_{p_6}$      | (0.0000027, 0.3911641) | (0.0000005, 0.2815806) | (0.0000038, 0.2212364)  | (0.0000026, 0.1835932) | (0.0000021, 0.1583586) |
| Statistics      | $n=40$                 | $n=50$                 | $n=70$                  | $n=100$                | $n=150$                |
| $K_S$           | 0.1287496              | 0.1163104              | 0.0990066               | 0.0832604              | 0.0683304              |
| $A^2$           | 0.8372623              | 0.8547370              | 0.8553903               | 0.8653879              | 0.8673797              |
| $W^2$           | 0.1099586              | 0.1120011              | 0.1125186               | 0.1140586              | 0.1142660              |
| $D_1$           | 0.9638084              | 0.8289536              | 0.6514604               | 0.4948165              | 0.3516397              |
| $D_2$           | 1.0257984              | 1.0004217              | 0.9626096               | 0.9238375              | 0.8788736              |
| $D_3$           | 0.5310165              | 0.4456933              | 0.3393338               | 0.2499478              | 0.1725250              |
| $D_4$           | 0.5247561              | 0.4732263              | 0.4001335               | 0.3286741              | 0.2558844              |
| $D_5$           | 0.7484511              | 0.6257921              | 0.4711254               | 0.3404107              | 0.2294589              |
| $D_6$           | 0.6946820              | 0.6015206              | 0.4774048               | 0.3645231              | 0.2609591              |
| $D_7$           | 0.6165693              | 0.5778559              | 0.5329362               | 0.4959891              | 0.4620343              |
| $D_{n,\lambda}$ | 0.1295442              | 0.1316666              | 0.1314667               | 0.1327258              | 0.1332119              |
| $Z_A$           | 3.4491725              | 3.4264184              | 3.3955640               | 3.3699320              | 3.3476972              |
| $Z_C$           | 15.5505597             | 16.3553360             | 17.4364689              | 18.7258816             | 19.9339421             |
| $Z_K$           | 2.5078059              | 2.6673377              | 2.8438683               | 3.0454883              | 3.2348852              |
| $MA^2$          | 0.5220599              | 0.5254324              | 0.5259482               | 0.5315039              | 0.5299482              |
| $AP_{p_1}$      | (0.5832045, 0.8939766) | (0.5896820, 0.8797860) | (0.6073926, 0.8603931)  | (0.6186589, 0.8371288) | (0.6373394, 0.8190010) |
| $AP_{p_2}$      | (0.1813727, 0.5034809) | (0.1952890, 0.4849342) | (0.21117630, 0.4564699) | (0.2294342, 0.4356794) | (0.2469321, 0.4155153) |
| $AP_{p_3}$      | (0.0595657, 0.3080891) | (0.0685050, 0.2868754) | (0.0788924, 0.2630598)  | (0.0918142, 0.2488706) | (0.1031914, 0.2287184) |
| $AP_{p_4}$      | (0.0132830, 0.2021986) | (0.0192511, 0.1881079) | (0.0255859, 0.1618041)  | (0.0310960, 0.1455267) | (0.0386731, 0.1316193) |
| $AP_{p_5}$      | (0.0027956, 0.1717283) | (0.0148431, 0.1793558) | (0.0181102, 0.1484130)  | (0.0266916, 0.1371092) | (0.0341346, 0.1232727) |
| $AP_{p_6}$      | (0.0000010, 0.1254875) | (0.0000059, 0.1069337) | (0.0000001, 0.0867152)  | (0.0052788, 0.0864436) | (0.0082429, 0.0701422) |

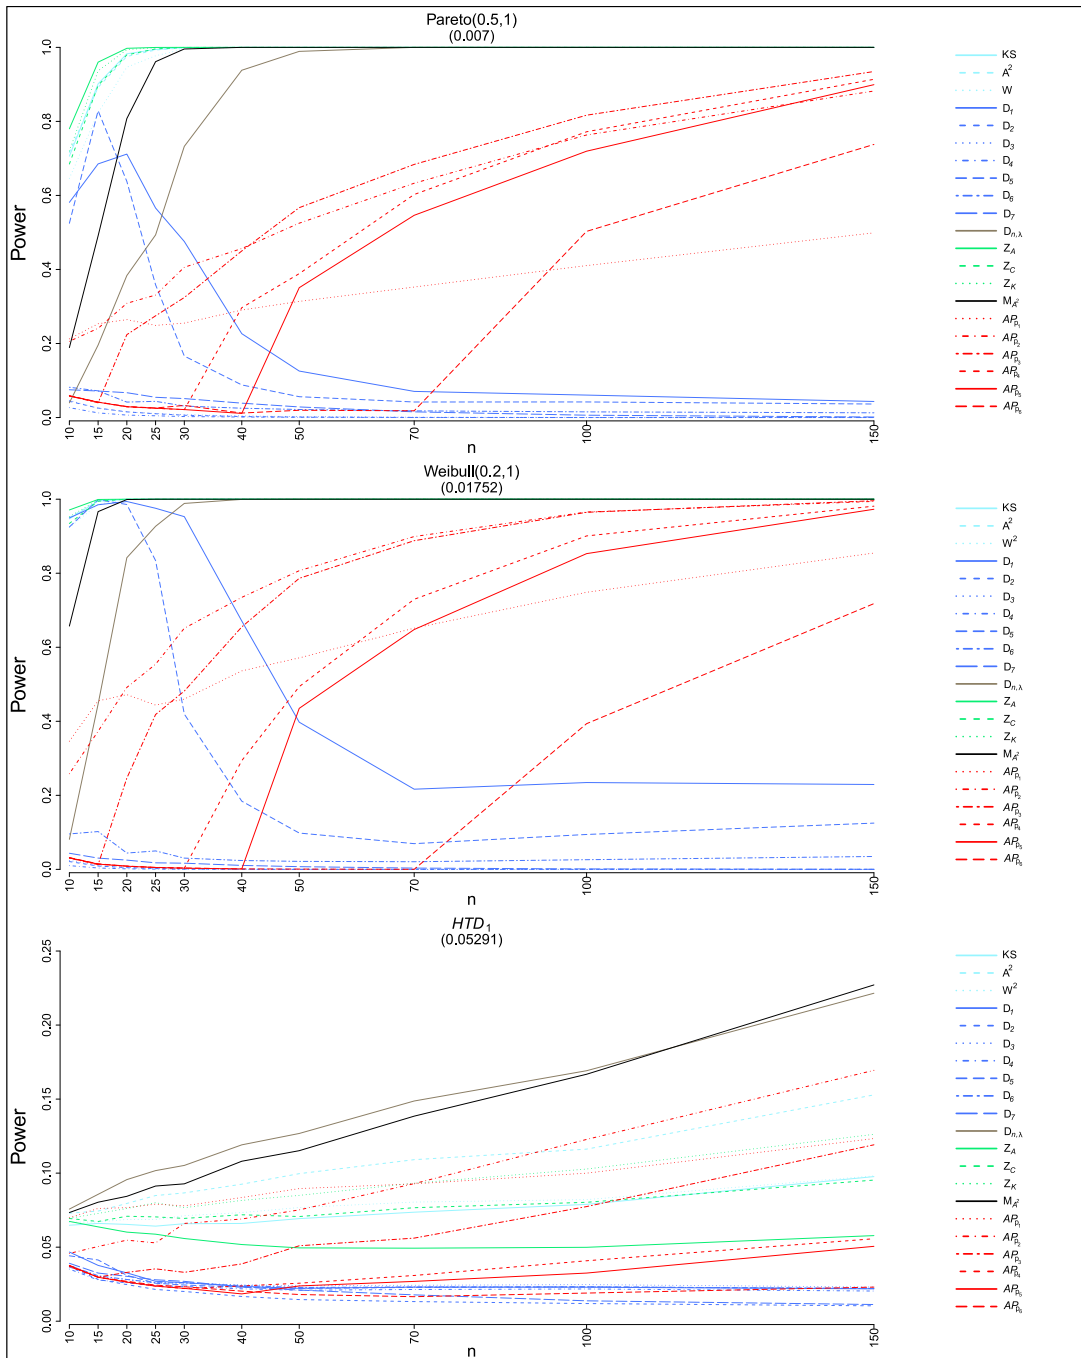

Figure 1. The empirical powers for different alternative distributions (1/10).

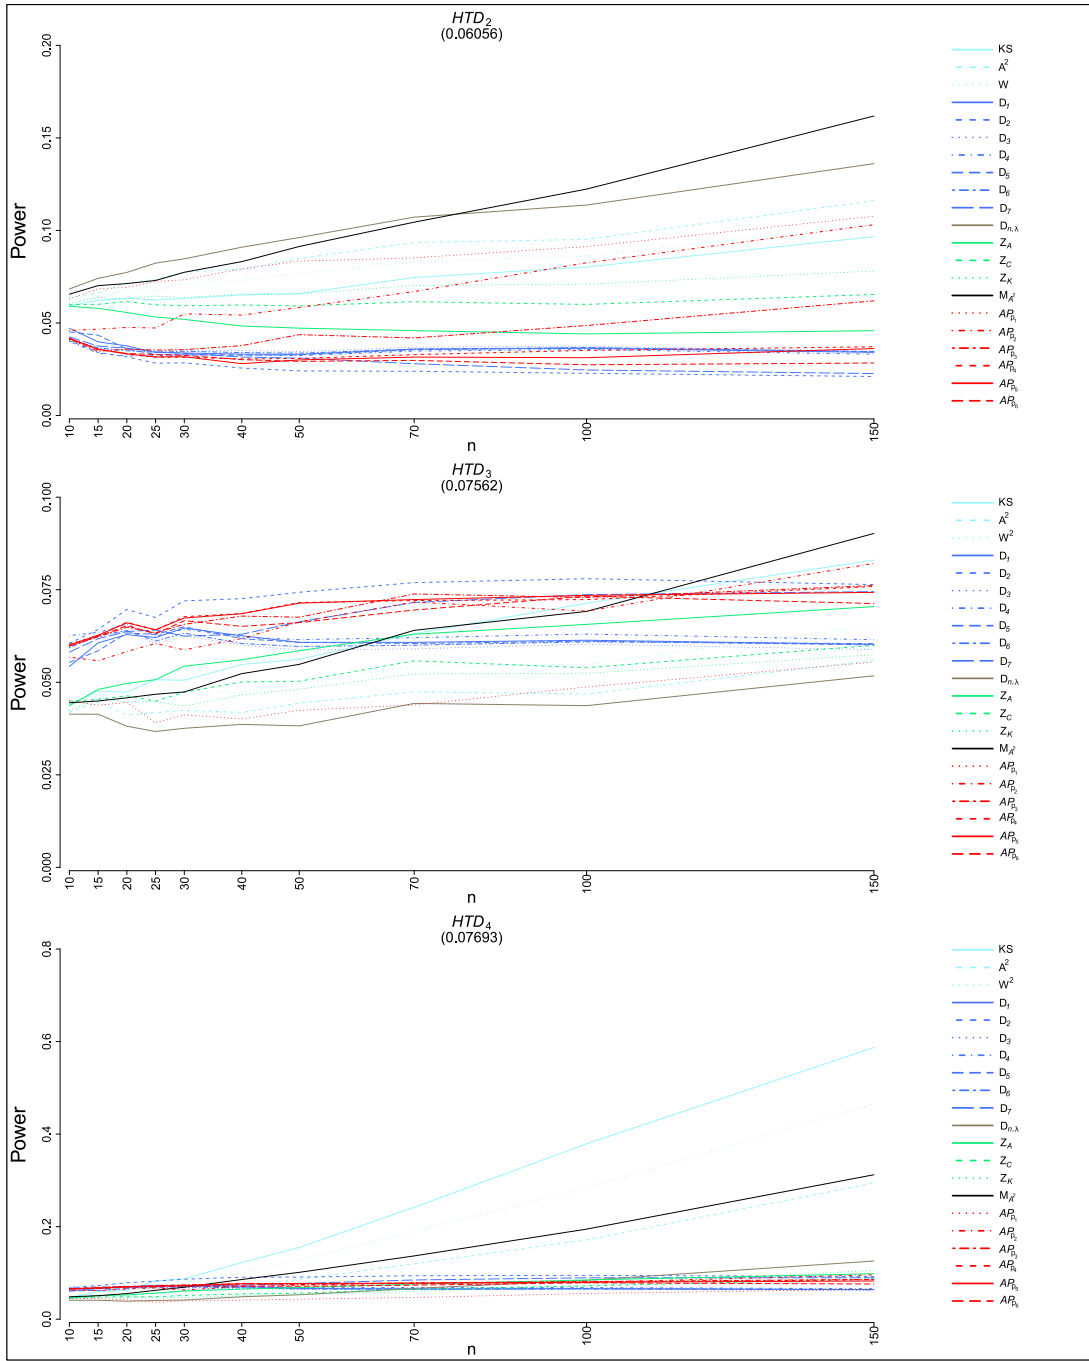

Figure 2. The empirical powers for different alternative distributions (2/10).

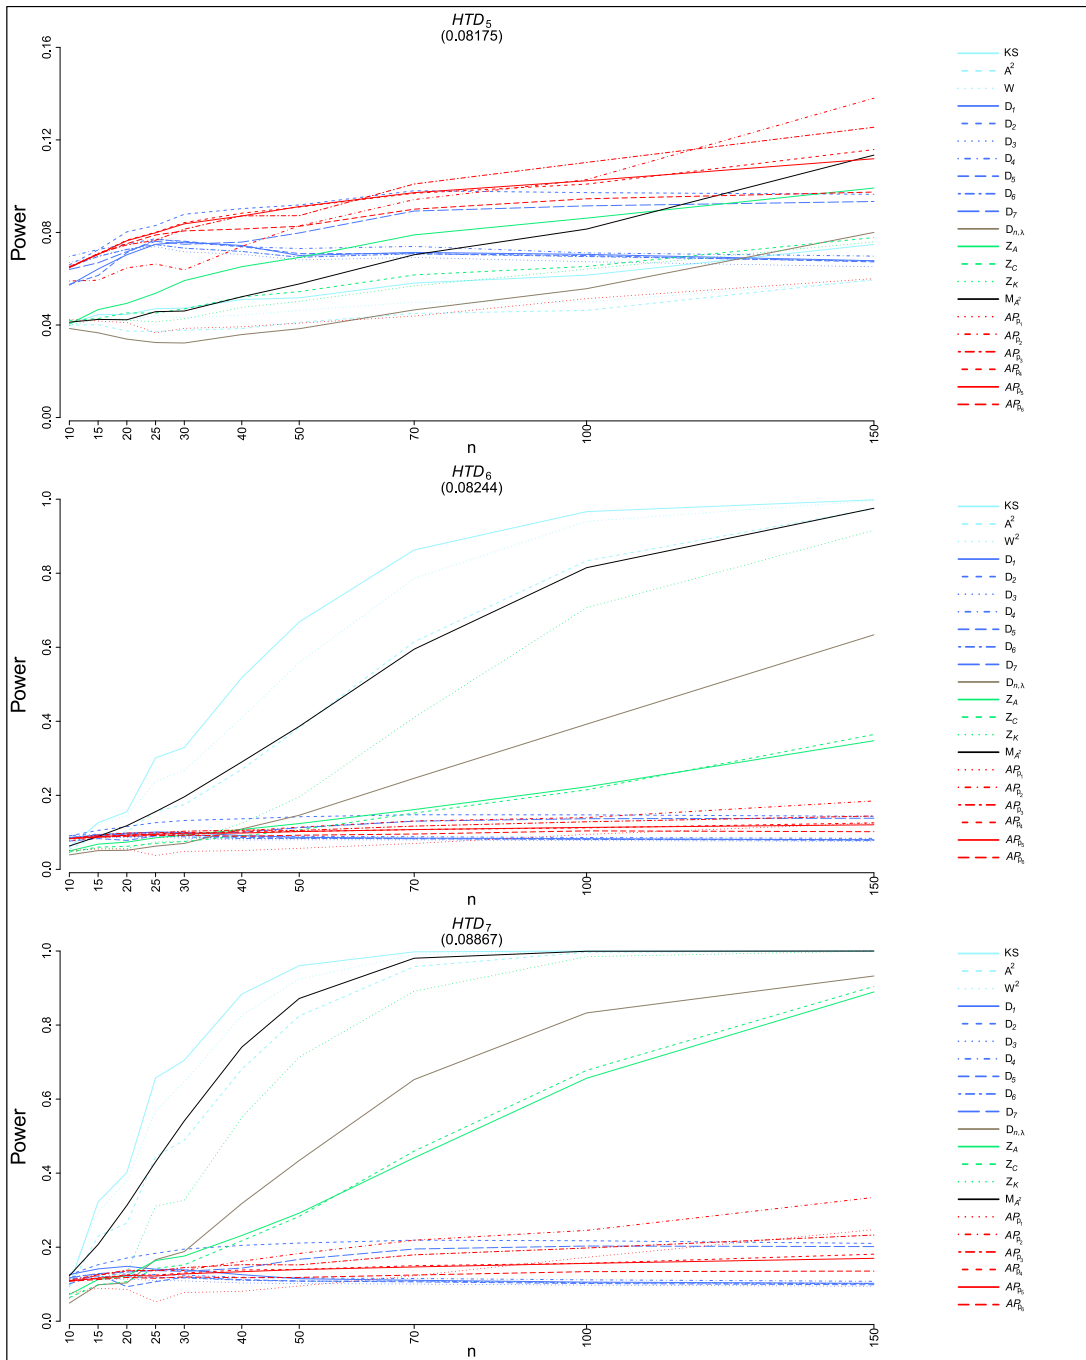

Figure 3. The empirical powers for different alternative distributions (3/10).



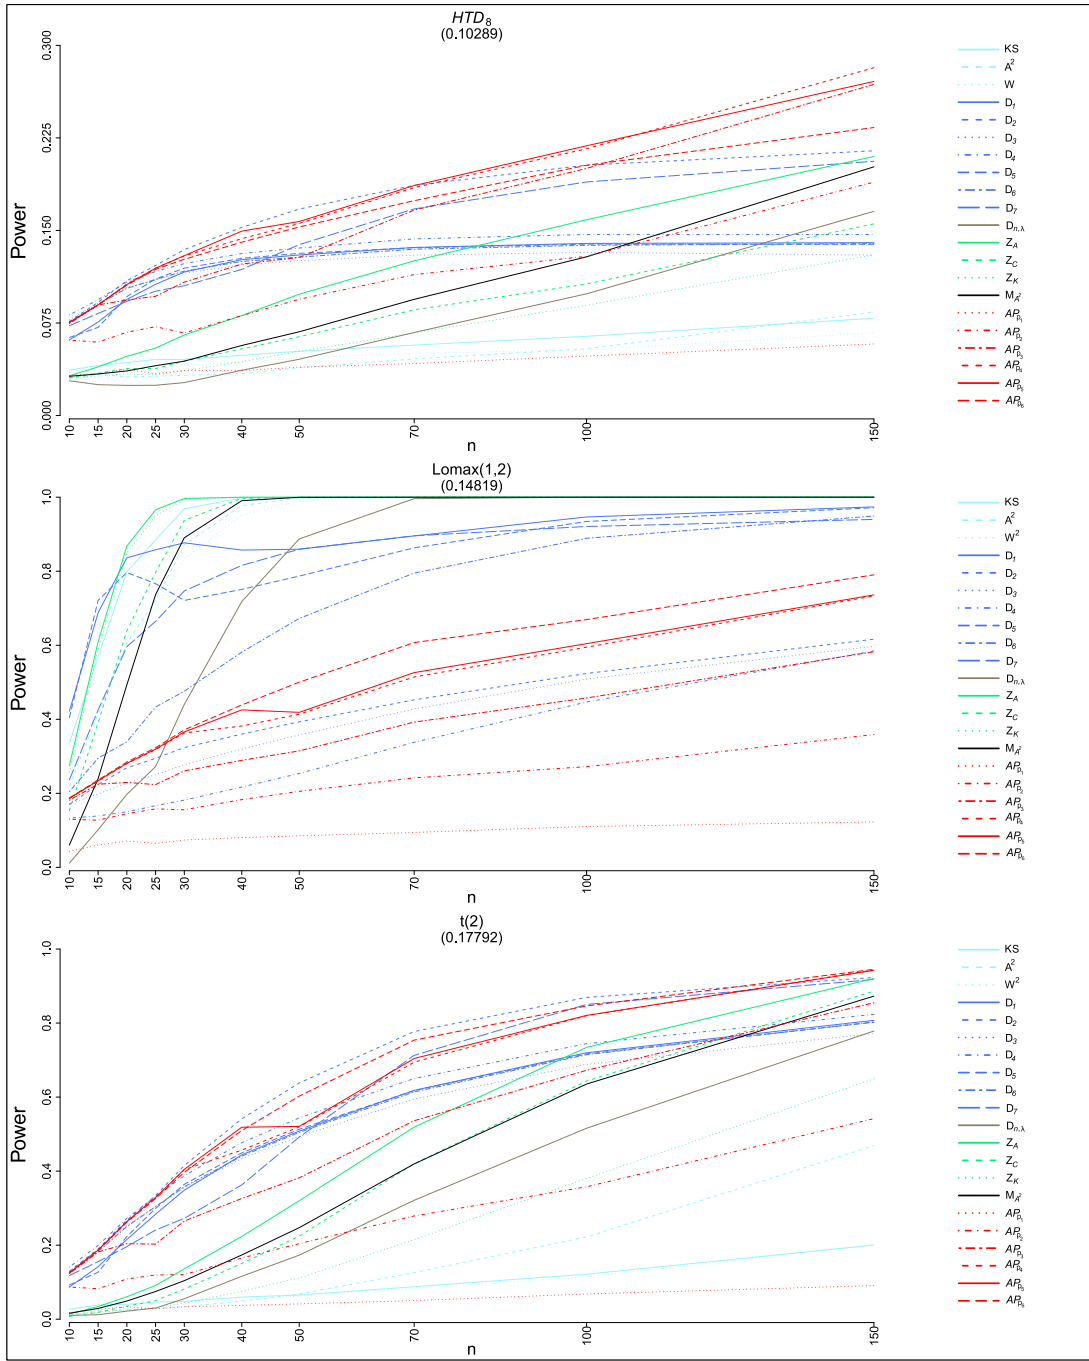

Figure 4. The empirical powers for different alternative distributions (4/10).

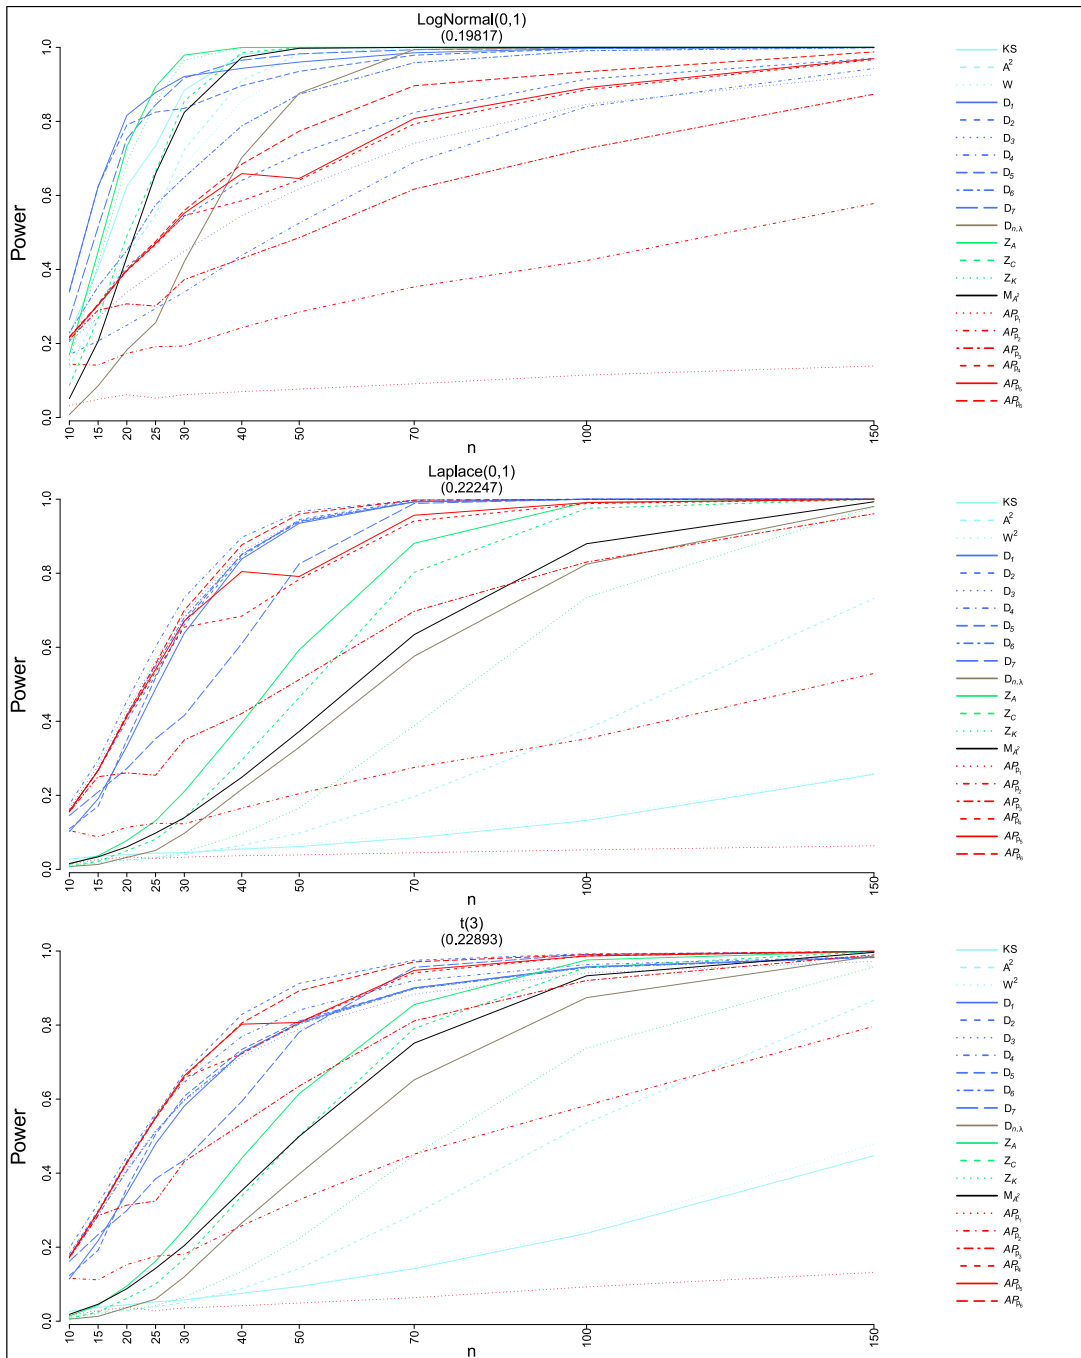

Figure 5. The empirical powers for different alternative distributions (5/10).

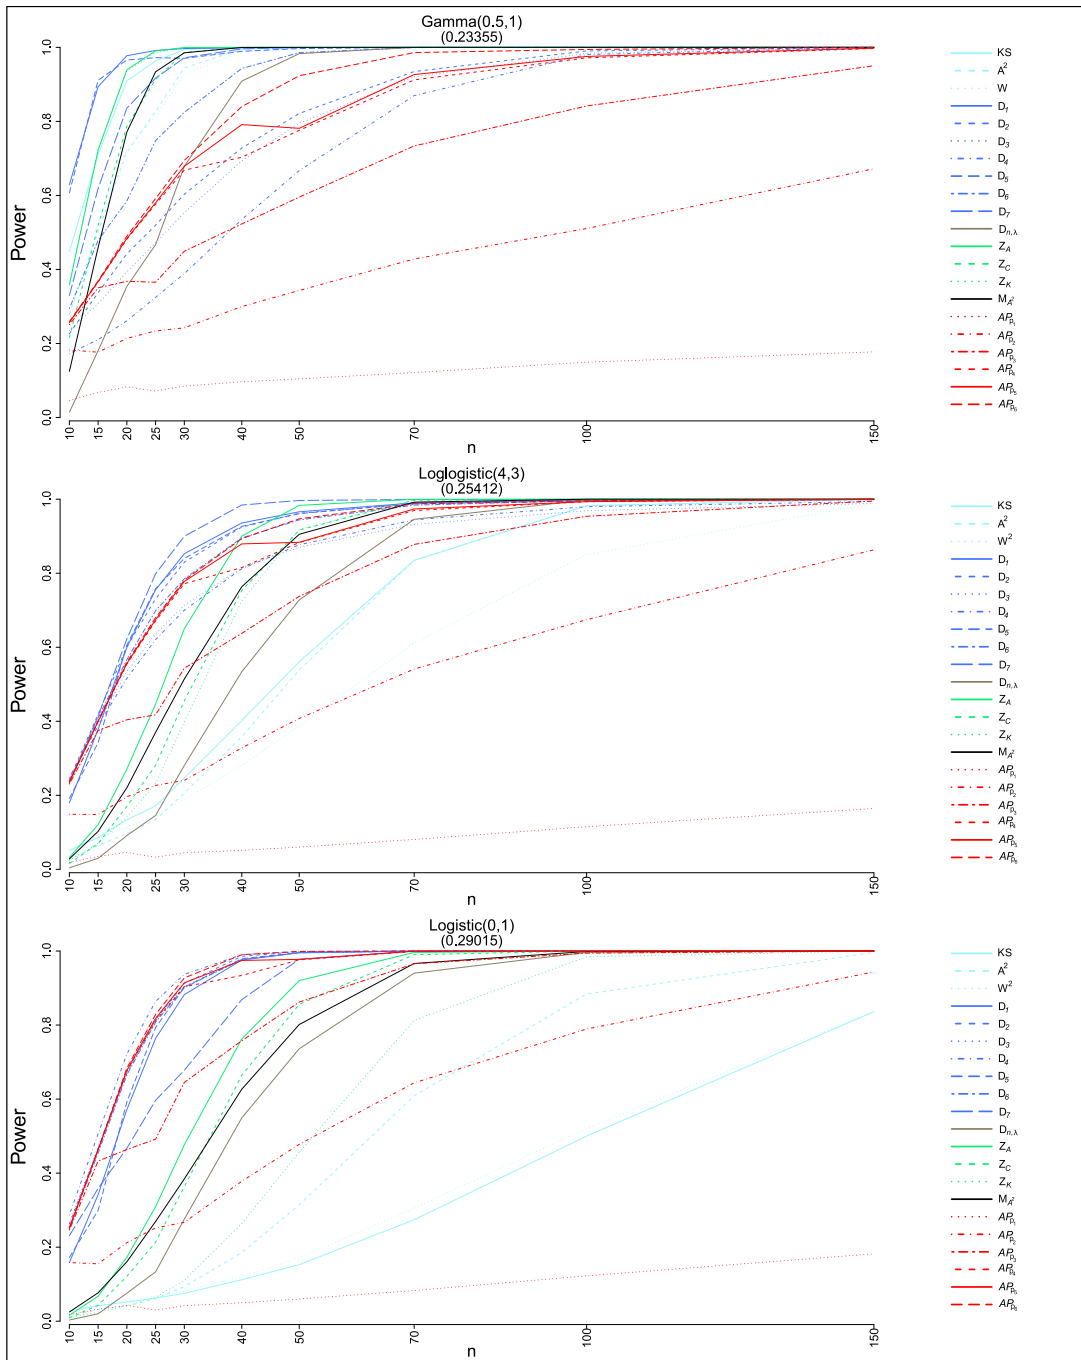

Figure 6. The empirical powers for different alternative distributions (6/10).

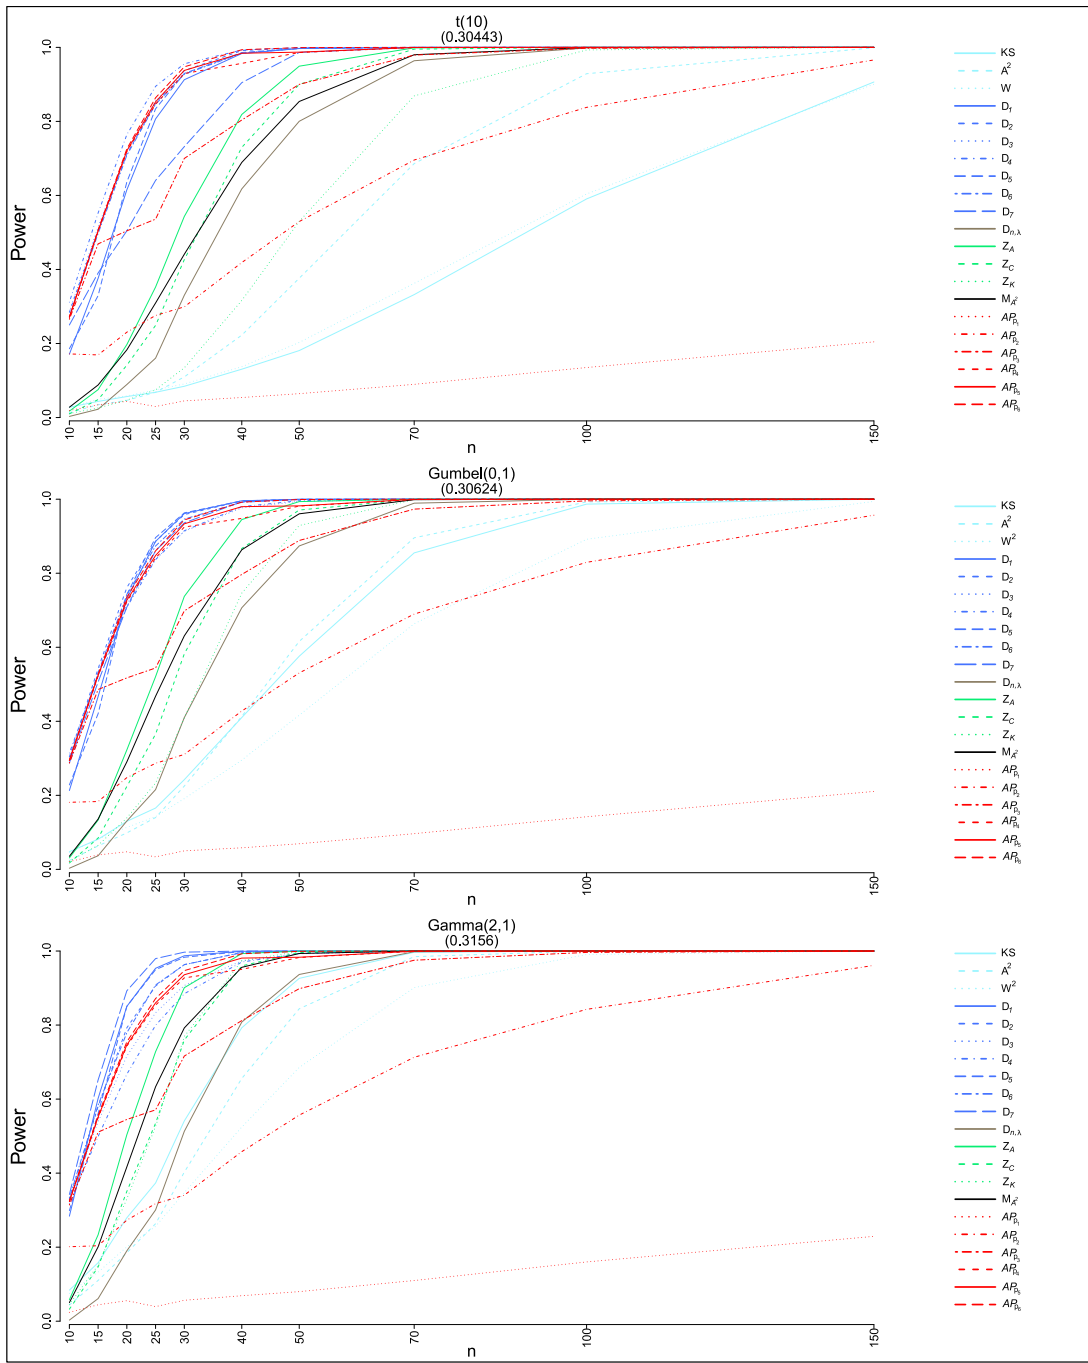

Figure 7. The empirical powers for different alternative distributions (7/10).

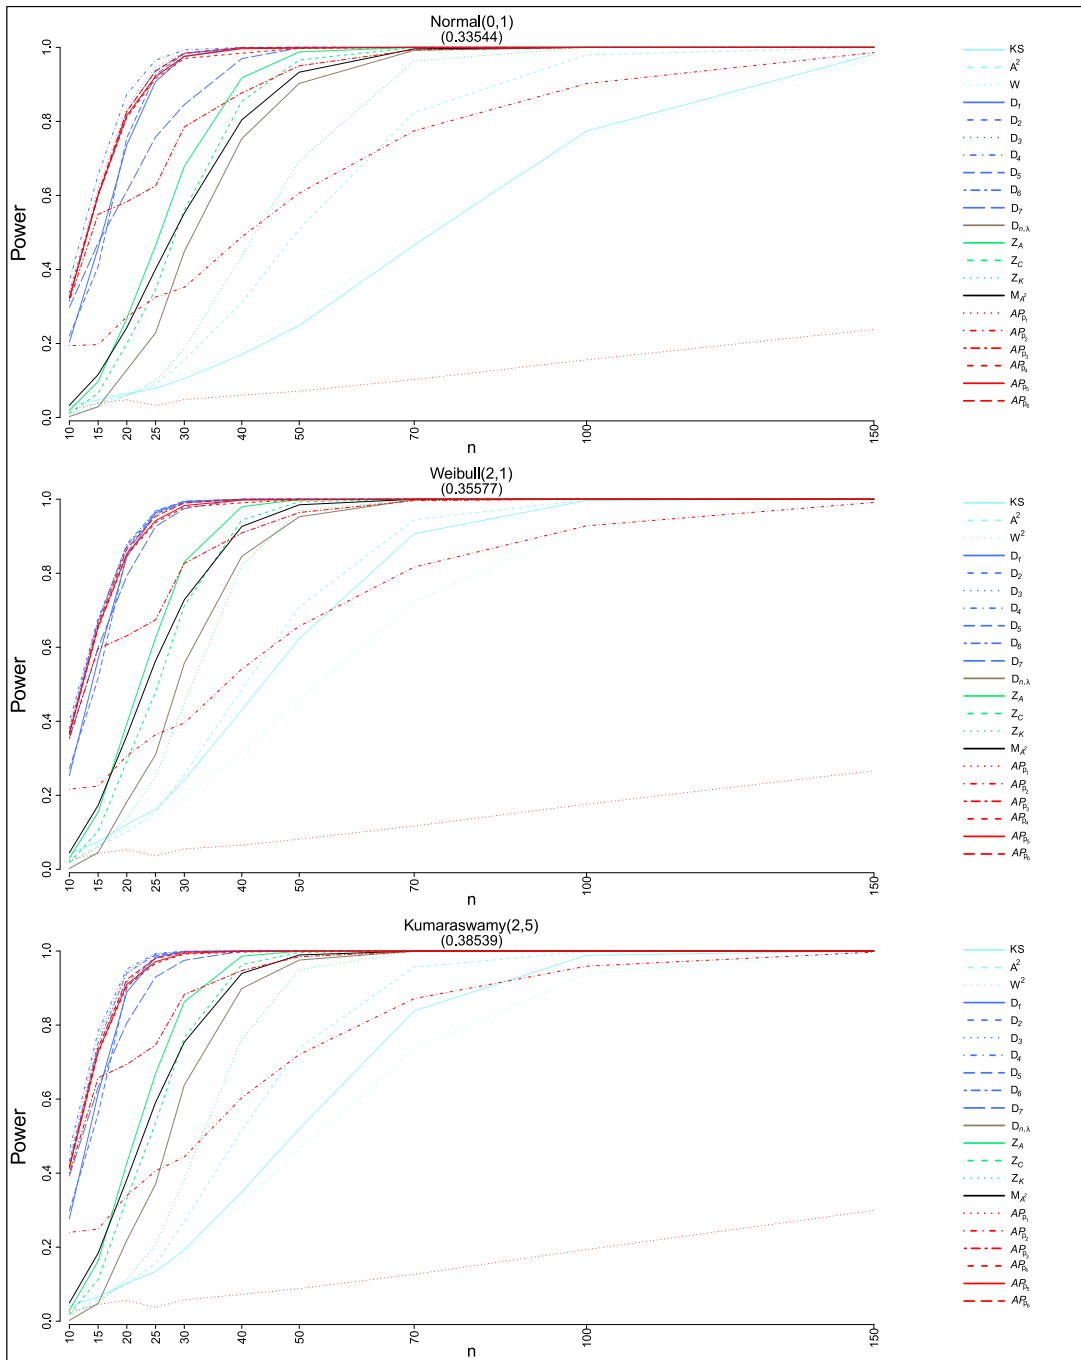

Figure 8. The empirical powers for different alternative distributions (8/10).

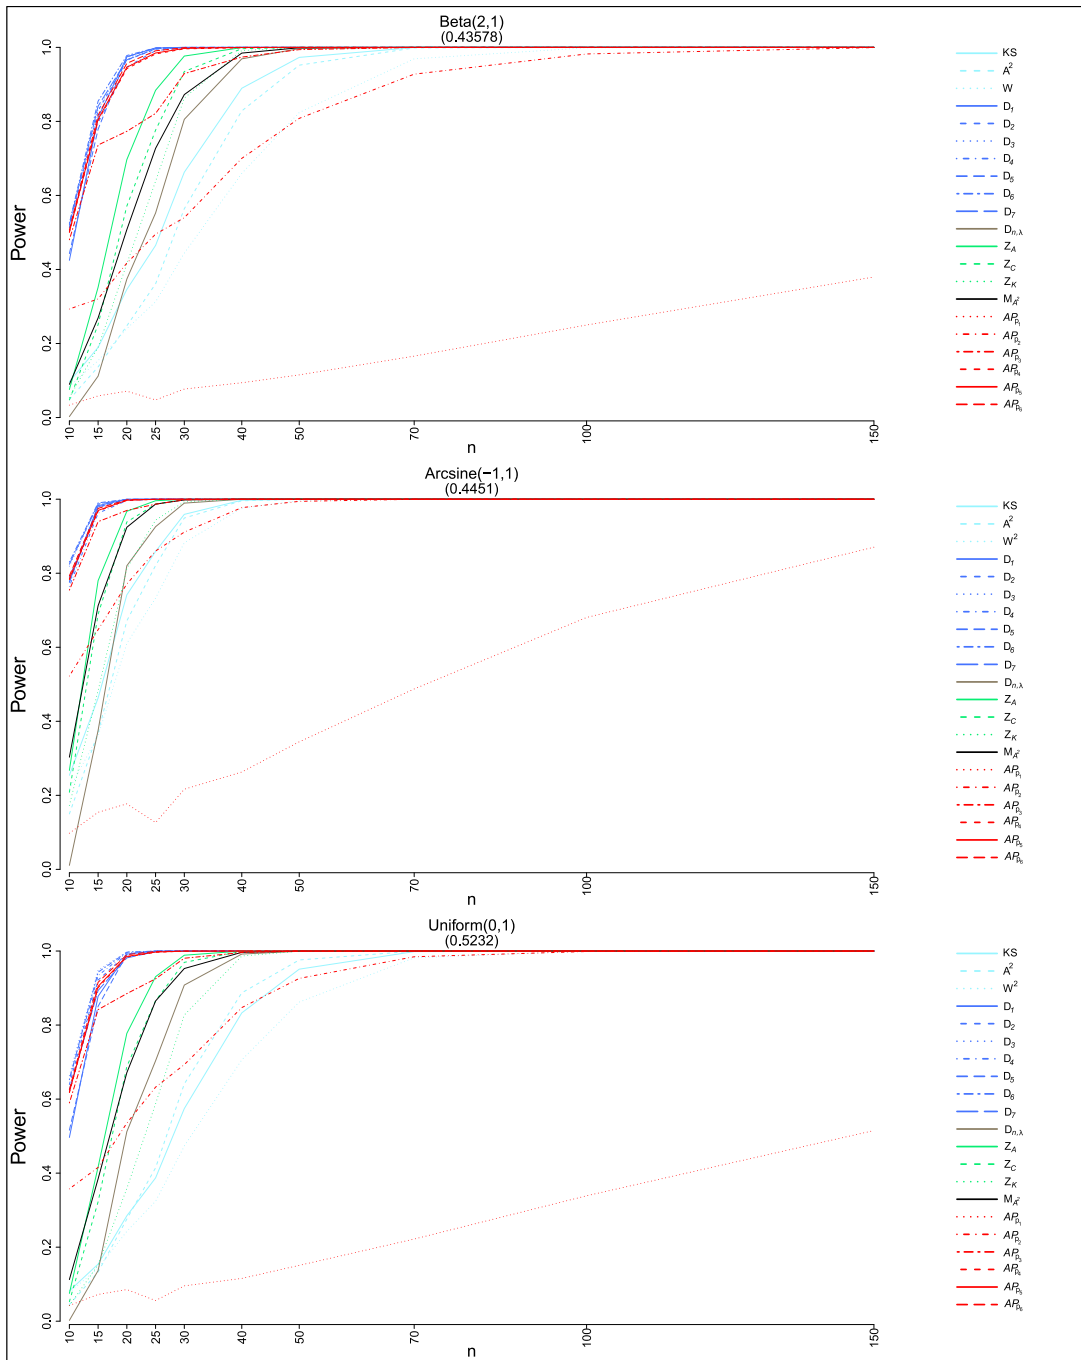

Figure 9. The empirical powers for different alternative distributions (9/10).

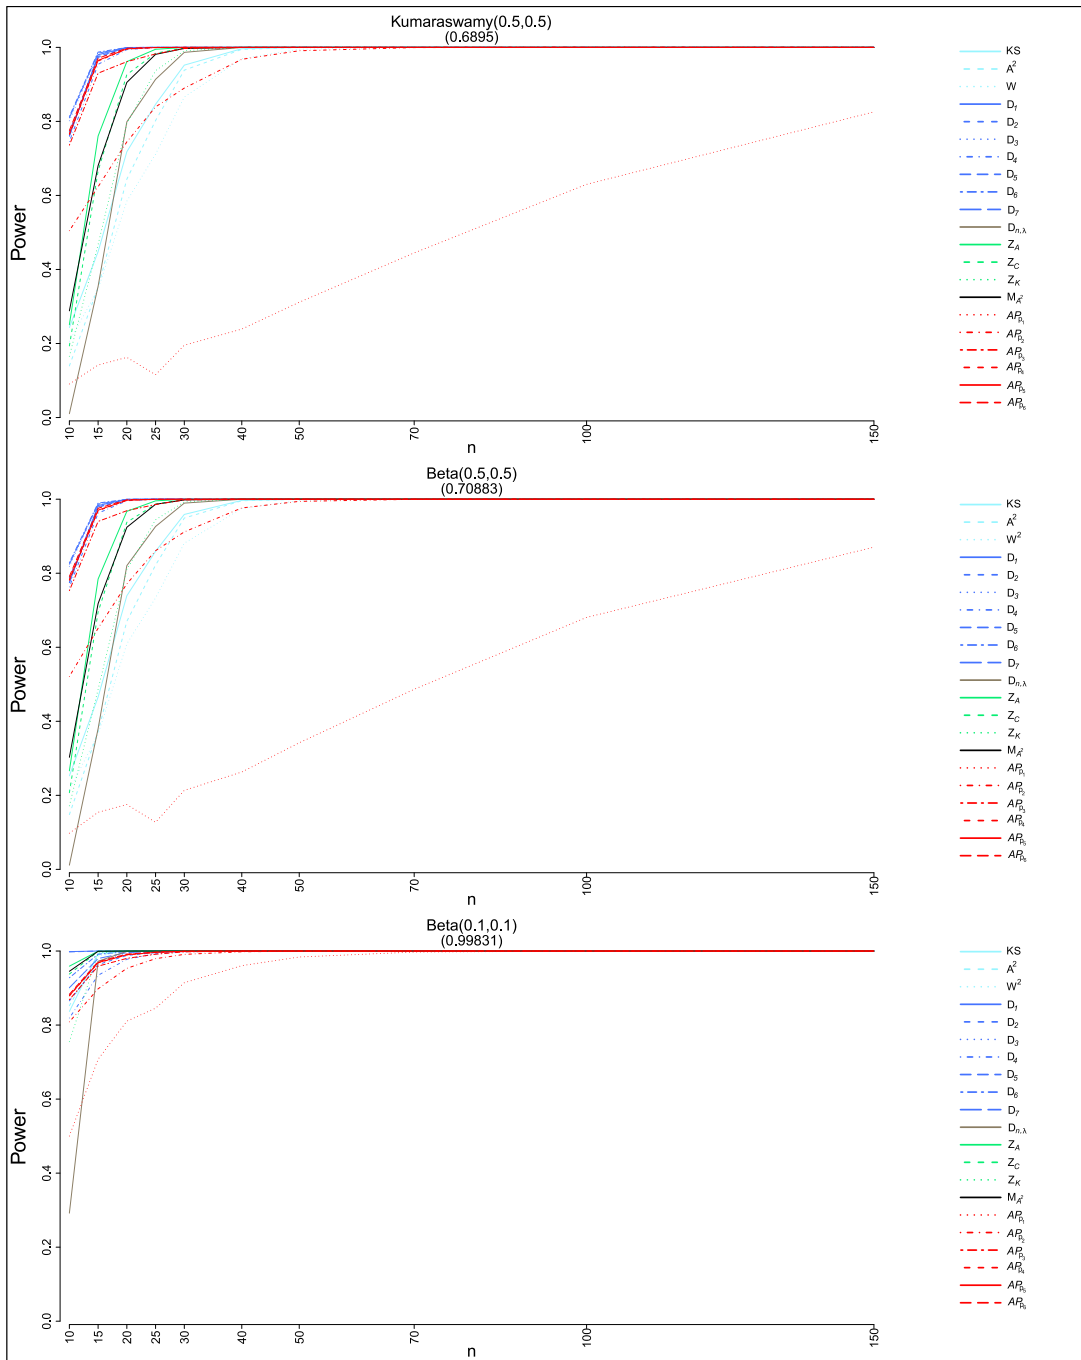

Figure 10. The empirical powers for different alternative distributions (10/10).

```

AP.test=function(x,alpha=0.05,n.trial=1000,asym=F,p1=0.02217468,p2=.25,p3=.75,p4=0.97782532)
{ n=NROW(x)
  b=quantile(x,probs=p4,names =F)
  a=quantile(x,probs=p1,names =F)
  AP=IQR(x)/(b-a) # AP statistics
  names(AP)=paste0("AP statistic")
  if (asym==T)
  { p=c(p1,p2,p3,p4)
    ksi1=qcauchy(p1,0,1); ksi2=qcauchy(p2,0,1)
    ksi3=qcauchy(p3,0,1); ksi4=qcauchy(p4,0,1)
    ksi=c(ksi1,ksi2,ksi3,ksi4)
    sigma=matrix(c(seq(1,16)),ncol =4,byrow =T)
    for(i1 in 1:4)
    {for(i2 in i1:4)
      {sigma[i1,i2]=(p[i1]*(1-p[i2]))/(dcauchy(ksi[i1],0,1)*dcauchy(ksi[i2],0,1))
      }
    }
    sigma[2,1]=sigma[1,2];sigma[3,1]=sigma[1,3];sigma[4,1]=sigma[1,4]
    sigma[3,2]=sigma[2,3];sigma[4,2]=sigma[2,4];sigma[4,3]=sigma[3,4]
    gradfun= function(x) {(x[3]-x[2])/(x[4]-x[1])} # define function
    gr=matrix(numDeriv::grad(gradfun, ksi)) # calculate
    varappr=(t(gr)%*%sigma%*%gr)/n #Asymptotic variance of AP statistic
    pr=(1-pnorm(AP,(qcauchy(p3)-qcauchy(p2))/(qcauchy(p4)-qcauchy(p1)),sqrt(varappr)))
    pval=2*min(pr,1-pr) #Asymptotic p value of AP statistic
    names(pval)="Asym.pval"
  }
  else
  {
    AP_sim=NULL
    for (tr in 1:n.trial)
    { y=rcauchy(n,0,1)
      b=quantile(y,probs =p4,names = F)
      a=quantile(y,probs =p1,names = F)
      AP_sim[tr]=IQR(y)/(b-a)
    }
    c=HDInterval::hdi(AP_sim,credMass = 1-alpha)
    if(mean(AP<c[1]|AP>c[2]))
    {rst=0;names(rst)=paste("p.value <",alpha)}
    else
    {rst=1;names(rst)=paste("p.value >",alpha)}
  }
  if (asym==T) return(list(asym_p.value=pval,statistic=AP)) else
  return(list(statistic=AP,simulation=AP_sim,result=rst))
}

```

Figure 11. The R code for the  $AP_p$  tests.
